# Supplementary material
Source: publisher figshare collection journal article supplement (https://sage.figshare.com/ndownloader/files/15142307)
Supplement: Supplementary file 1 [file 15142307]

## Sheet: Description of Variables
Variables
Sales:	De-identified daily sales
ppt:	Precipitation measured in millimeters (MM)
maxtemp:	Maximum daily temperature measured in degrees Celcius (C )
mintemp:	Minimum daily temperature measured in degrees Celcius (C )
cc:	Cloud cover measured as % of day cloud cover present
wind:	Average wind speed measured in meteres per second
ppt10:	Days in which precipitation exceeded 10 millimeters (MM), coded 0 for no and 1 for yes
ppt20:	Days in which precipitation exceeded 20 millimeters (MM), coded 0 for no and 1 for yes
ppt50:	Days in which precipitation exceeded 50 millimeters (MM), coded 0 for no and 1 for yes
ppt100:	Days in which precipitation exceeded 100 millimeters (MM), coded 0 for no and 1 for yes
tmax34:	Days in which maximum temperature was above 34 Celcius (C ), coded 0 for no and 1 for yes
tmin23:	Days in which minimum temperature was below 23 Celcius (C ), coded 0 for no and 1 for yes
tmin0:	Days in which average minimum temperature was below 0 Celcius (C ), coded 0 for no and 1 for yes
season:	Winter (1), Spring (2), Summer (3), and Fall (4)
month:	January (1) - December (12)
day:	2007 (7) - 2016 (16)
Missing Values
-9,999 for cloud cover (CC) and wind speed (wind) indicates missing values and should not be included in analysis

## Sheet: Supplemental Sales and Weather 
year	season	month	day	sales	cc	ppt	mintemp	maxtemp	wind	ppt10	ppt20	ppt50	ppt100	tmax34	tmin23	tmin0
7	1	1	1	2141.12	93.875	0	4.56	18.32	6.42	0	0	0	0	0	1	0
7	1	1	2	2180.28	54.25	12.28	7.28	21.72	5.73	1	0	0	0	0	1	0
7	1	1	3	2204.67	7.5	0	0.24	11.82	1.13	0	0	0	0	0	1	0
7	1	1	4	2148.21	13.375	0	1.31	16.11	3.81	0	0	0	0	0	1	0
7	1	1	5	2108.49	100	0.37	13.33	21.11	3.81	0	0	0	0	0	1	0
7	1	1	6	2180.03	60	9.45	17.02	21.97	5.48	0	0	0	0	0	1	0
7	1	1	7	2117.3	30.25	0	9.1	22.7	0.65	0	0	0	0	0	1	0
7	1	1	8	2075	100	4.91	12.04	21.03	4.29	0	0	0	0	0	1	0
7	1	1	9	2095.09	20.375	18.07	1.66	19.45	4.17	1	0	0	0	0	1	0
7	1	1	10	2073.03	34.75	0.29	1.23	11.74	7.65	0	0	0	0	0	1	0
7	1	1	11	2145.2	7.75	0	-2.35	6.58	2.03	0	0	0	0	0	1	1
7	1	1	12	2064.84	52.625	0	-1.36	8.4	3.74	0	0	0	0	0	1	1
7	1	1	13	2112.74	52.375	0	6.7	18.79	4.44	0	0	0	0	0	1	0
7	1	1	14	2165.47	26.625	0	13.62	21.14	4.22	0	0	0	0	0	1	0
7	1	1	15	2038	73.5	0	14.11	22.79	5.05	0	0	0	0	0	1	0
7	1	1	16	2016.45	93.125	0	16.58	22.82	2.85	0	0	0	0	0	1	0
7	1	1	17	1993.12	79.375	2.87	0.48	17.23	8.4	0	0	0	0	0	1	0
7	1	1	18	1993.26	83.125	0	-2.97	5.26	3.09	0	0	0	0	0	1	1
7	1	1	19	1996.03	80.625	7.91	5.18	7.76	4.49	0	0	0	0	0	1	0
7	1	1	20	2118.6	20	0	1.2	11.75	7.18	0	0	0	0	0	1	0
7	1	1	21	2026.37	55.875	0	-0.19	6.1	3.92	0	0	0	0	0	1	1
7	1	1	22	2013.3	97.625	15.91	1.02	6.78	2.04	1	0	0	0	0	1	0
7	1	1	23	2076.37	81.625	0	4.28	6.62	4.01	0	0	0	0	0	1	0
7	1	1	24	1983.33	65.375	0	-1.06	6.15	2.66	0	0	0	0	0	1	1
7	1	1	25	2009.27	68.875	0	-0.89	7.2	3.4	0	0	0	0	0	1	1
7	1	1	26	2198	19.375	0	-4.43	6.62	7.4	0	0	0	0	0	1	1
7	1	1	27	2170.21	8.625	0	-4.42	4.12	4.99	0	0	0	0	0	1	1
7	1	1	28	2099	80.75	0	4.55	16.64	3.56	0	0	0	0	0	1	0
7	1	1	29	2034.1	56.5	2.82	-3.25	12.1	7.82	0	0	0	0	0	1	1
7	1	1	30	1990.9	10.625	0	-4.37	2.18	4.34	0	0	0	0	0	1	1
7	1	1	31	2010.7	33.125	0	-1.73	7.85	5.38	0	0	0	0	0	1	1
7	1	2	1	2074.8	77.75	0	-3.18	2.22	1	0	0	0	0	0	1	1
7	1	2	2	2102.2	100	6.35	0.2	5.33	3.5	0	0	0	0	0	1	0
7	1	2	3	2112.62	48.875	4.65	0.75	8.79	5.29	0	0	0	0	0	1	0
7	1	2	4	2163.84	51.5	0	-0.34	6.61	4.4	0	0	0	0	0	1	1
7	1	2	5	2074.42	33.875	0	-4.17	10.48	6.84	0	0	0	0	0	1	1
7	1	2	6	2083.45	9.75	0	-8.79	0.57	5.7	0	0	0	0	0	1	1
7	1	2	7	2107.45	77	0	-7.82	3.18	3.36	0	0	0	0	0	1	1
7	1	2	8	2088.59	19.25	0	-5.18	3.83	4.7	0	0	0	0	0	1	1
7	1	2	9	2146.19	12.875	0	-6.92	4.46	4.43	0	0	0	0	0	1	1
7	1	2	10	2265.44	29.625	0	-5.29	3.93	4.4	0	0	0	0	0	1	1
7	1	2	11	2133.06	13.75	0	-4.76	4.38	3.22	0	0	0	0	0	1	1
7	1	2	12	2059.7	49.375	0	-2.42	2.83	1.59	0	0	0	0	0	1	1
7	1	2	13	2014.7	95	3.09	-0.56	9.81	3.95	0	0	0	0	0	1	1
7	1	2	14	2033.2	100	28.84	2.86	15.37	1.66	1	1	0	0	0	1	0
7	1	2	15	2113.81	47.25	0.5	-3.28	8.78	7.99	0	0	0	0	0	1	1
7	1	2	16	2513.48	29.625	0	-4.41	1.78	6.29	0	0	0	0	0	1	1
7	1	2	17	2423.5	21.875	0	-6.02	1.72	3.38	0	0	0	0	0	1	1
7	1	2	18	2214.75	63.75	0	-3.3	8.28	4.09	0	0	0	0	0	1	1
7	1	2	19	2093.45	29.125	0	-4.27	5.57	7.17	0	0	0	0	0	1	1
7	1	2	20	2089.71	69.875	0	-2.88	5.61	6.09	0	0	0	0	0	1	1
7	1	2	21	2091.13	63.25	0	7.11	18.27	2.78	0	0	0	0	0	1	0
7	1	2	22	2087.25	70.75	2.55	6.84	14.75	1.13	0	0	0	0	0	1	0
7	1	2	23	2136.33	55.375	2.95	3.95	20.29	8.42	0	0	0	0	0	1	0
7	1	2	24	2116.53	4.5	0	0.3	7.92	6.48	0	0	0	0	0	1	0
7	1	2	25	2145.44	86.75	1.99	0.99	8.38	1.57	0	0	0	0	0	1	0
7	1	2	26	2151.16	72.125	19.48	3.96	13.73	1.34	1	0	0	0	0	1	0
7	1	2	27	2170.26	49.25	0.03	1.04	11.41	2.36	0	0	0	0	0	1	0
7	1	2	28	2209.61	36.5	0	3.32	13.01	3.02	0	0	0	0	0	1	0
7	2	3	1	2150.4	31.25	0	1.88	9.87	2.74	0	0	0	0	0	1	0
7	2	3	2	2236.34	100	5.96	6.87	16.88	5.44	0	0	0	0	0	1	0
7	2	3	3	2359	27.375	0.45	7.26	22.48	3.29	0	0	0	0	0	1	0
7	2	3	4	2123.2	32.5	0	3.52	19.78	3.41	0	0	0	0	0	1	0
7	2	3	5	2128.4	8.375	0	-0.91	9.1	5.84	0	0	0	0	0	1	1
7	2	3	6	2191.88	16.625	0	-0.63	15.84	5.78	0	0	0	0	0	1	1
7	2	3	7	2215.88	86.875	0	-2.98	2.23	1.3	0	0	0	0	0	1	1
7	2	3	8	2085.71	39.75	0	-1.01	14.5	6.09	0	0	0	0	0	1	1
7	2	3	9	2070.85	27.375	0	-0.04	6.36	4.51	0	0	0	0	0	1	1
7	2	3	10	2144.53	51.625	0	2.76	7.89	3.22	0	0	0	0	0	1	0
7	2	3	11	2031.01	49.375	0	7.47	18.9	0.52	0	0	0	0	0	1	0
7	2	3	12	2083.58	9.75	0	1.45	15.34	2.94	0	0	0	0	0	1	0
7	2	3	13	2109.76	56.625	0	4.39	10.62	2.37	0	0	0	0	0	1	0
7	2	3	14	2162.18	57.875	0	9.87	21.64	3.95	0	0	0	0	0	1	0
7	2	3	15	2179.63	43.75	0	16.02	26.95	4.63	0	0	0	0	0	1	0
7	2	3	16	2311.93	100	1.49	7.31	27.56	2.17	0	0	0	0	0	1	0
7	2	3	17	2324.61	71.375	31.16	1.63	11.68	7.11	1	1	0	0	0	1	0
7	2	3	18	2150.49	14.625	0	-1.39	5.88	6.88	0	0	0	0	0	1	1
7	2	3	19	2138.6	5.875	0	-2.63	8.16	2.21	0	0	0	0	0	1	1
7	2	3	20	2104.86	56.375	0	2.56	14.27	4.19	0	0	0	0	0	1	0
7	2	3	21	2082.04	93.375	0	7.78	20.93	5.66	0	0	0	0	0	1	0
7	2	3	22	2245.51	77.5	0	7.64	10.25	2.92	0	0	0	0	0	1	0
7	2	3	23	2320.47	13.875	0	11.58	23.2	3.98	0	0	0	0	0	1	0
7	2	3	24	2497.82	57.5	0	13.7	27.58	0.37	0	0	0	0	0	1	0
7	2	3	25	2228.89	21.375	0	10.16	16.68	2.99	0	0	0	0	0	1	0
7	2	3	26	2061.04	57.125	0	6.71	13.85	2.72	0	0	0	0	0	1	0
7	2	3	27	2114.8	42.625	0	9.84	20.97	4.19	0	0	0	0	0	1	0
7	2	3	28	2064.91	28.75	0	15.14	30.24	2.15	0	0	0	0	0	1	0
7	2	3	29	2149.26	63.125	0.41	10.14	21.06	5.26	0	0	0	0	0	1	0
7	2	3	30	2290.26	2.75	0	3.36	13.78	1.97	0	0	0	0	0	1	0
7	2	3	31	2467.41	18	0	7.14	15.56	2.35	0	0	0	0	0	1	0
7	2	4	1	2280.51	90.5	0	12.53	22.64	1.55	0	0	0	0	0	1	0
7	2	4	2	2363	58.625	3.7	15.77	21.76	3.32	0	0	0	0	0	1	0
7	2	4	3	2309.81	5.5	0	11.65	28.53	0.94	0	0	0	0	0	1	0
7	2	4	4	2576.8	69.75	0	9.53	23.76	2.52	0	0	0	0	0	1	0
7	2	4	5	2719.68	25.5	0	6.28	26.54	3.41	0	0	0	0	0	1	0
7	2	4	6	3208.65	52.625	0	2.27	13.21	3.29	0	0	0	0	0	1	0
7	2	4	7	2937.52	100	7.1	1.07	9.48	3.02	0	0	0	0	0	1	0
7	2	4	8	2656.17	45.125	2.66	-0.49	6.5	5.94	0	0	0	0	0	1	1
7	2	4	9	2586.07	35.25	0	1.14	10.84	2.95	0	0	0	0	0	1	0
7	2	4	10	2640.72	36.125	0	0.22	9.38	2.76	0	0	0	0	0	1	0
7	2	4	11	2775.92	59	0	6.01	12.51	5.27	0	0	0	0	0	1	0
7	2	4	12	3007.14	87.875	4.07	10.88	19.02	2.59	0	0	0	0	0	1	0
7	2	4	13	3144.74	20.375	2.7	7.95	24.07	3.76	0	0	0	0	0	1	0
7	2	4	14	3035.46	49.875	0	6.29	17.52	1.19	0	0	0	0	0	1	0
7	2	4	15	2466.91	100	9.22	10.94	16.6	6.15	0	0	0	0	0	1	0
7	2	4	16	2427.24	76.25	42.7	6.72	22.45	8.72	1	1	0	0	0	1	0
7	2	4	17	2492.58	83	0	9.3	13.04	7.8	0	0	0	0	0	1	0
7	2	4	18	2590.82	65.875	0	8.71	15.69	5.78	0	0	0	0	0	1	0
7	2	4	19	2967.27	83.75	0	6.9	11.64	4.74	0	0	0	0	0	1	0
7	2	4	20	3963.81	31.75	0	7.22	12.1	4.19	0	0	0	0	0	1	0
7	2	4	21	4565.27	0	0	3.55	19.02	0.93	0	0	0	0	0	1	0
7	2	4	22	2852.22	4.25	0	9.39	23.59	1.36	0	0	0	0	0	1	0
7	2	4	23	2380.37	8.25	0	13.83	25.92	4.68	0	0	0	0	0	1	0
7	2	4	24	2203.91	16	0	17.17	28.06	5.27	0	0	0	0	0	1	0
7	2	4	25	2319.32	11.125	1.78	17.22	29.13	3.17	0	0	0	0	0	1	0
7	2	4	26	2486.13	26.125	0	11.22	30.42	1.94	0	0	0	0	0	1	0
7	2	4	27	2794.73	88.5	0	11.2	21.4	4.01	0	0	0	0	0	1	0
7	2	4	28	3153.67	81.875	6.45	15.69	27.46	0.83	0	0	0	0	0	1	0
7	2	4	29	2395.34	32.625	0	12.33	20.99	2.41	0	0	0	0	0	1	0
7	2	4	30	2381.74	7.25	0	12.28	24.13	3.71	0	0	0	0	0	1	0
7	2	5	1	2304.57	11.5	0	16.37	29.76	1.19	0	0	0	0	0	1	0
7	2	5	2	2535.3	34.125	0	18.42	24.31	3.56	0	0	0	0	0	1	0
7	2	5	3	2983.98	96.75	4.32	13.92	31.47	5.96	0	0	0	0	0	1	0
7	2	5	4	7148.98	76.875	6.66	12.87	15.46	4.16	0	0	0	0	0	1	0
7	2	5	5	7382.22	71.25	0	10.89	17.23	3.01	0	0	0	0	0	1	0
7	2	5	6	2342.45	61.5	11.1	12.98	20.37	7.01	1	0	0	0	0	1	0
7	2	5	7	2206.67	2.125	0	8.98	13.96	10.8	0	0	0	0	0	1	0
7	2	5	8	2245.26	57.875	1.13	10.6	14.21	7.62	0	0	0	0	0	1	0
7	2	5	9	2091.05	39	2.25	13.3	16.55	4.23	0	0	0	0	0	1	0
7	2	5	10	2513.76	10.625	0	16.66	21.25	2.09	0	0	0	0	0	1	0
7	2	5	11	3923.44	48.875	0	16.26	23.92	1.57	0	0	0	0	0	1	0
7	2	5	12	4056.64	55.875	1.67	18.31	28.53	0.52	0	0	0	0	0	1	0
7	2	5	13	2524.39	87.25	0.4	14.12	25.08	5.42	0	0	0	0	0	1	0
7	2	5	14	2426.49	3.125	0	5.85	16.61	1.92	0	0	0	0	0	1	0
7	2	5	15	2491.2	30.5	0	13.73	21.01	4.58	0	0	0	0	0	1	0
7	2	5	16	2826.48	2.25	0	17.77	26.92	6.67	0	0	0	0	0	1	0
7	2	5	17	2558.16	98.25	9.34	16.66	28.64	1.12	0	0	0	0	0	1	0
7	2	5	18	3896.97	100	7.51	13.04	18.36	7.3	0	0	0	0	0	1	0
7	2	5	19	4127.37	50.625	0	11.14	14.2	3.48	0	0	0	0	0	1	0
7	2	5	20	2336.4	3.75	0	11.88	21.41	3.96	0	0	0	0	0	1	0
7	2	5	21	1977.13	10.875	0	15.07	27.46	1.44	0	0	0	0	0	1	0
7	2	5	22	2057.37	7.75	0	11.45	21.95	3.31	0	0	0	0	0	1	0
7	2	5	23	2327.95	7.875	0	12.35	20.04	3.7	0	0	0	0	0	1	0
7	2	5	24	3469.44	6	0	11.4	22.16	2.65	0	0	0	0	0	1	0
7	2	5	25	11866.3	4	0	13.01	22.26	2.42	0	0	0	0	0	1	0
7	2	5	26	14147.1	14.25	0	17.85	27.12	3.52	0	0	0	0	0	1	0
7	2	5	27	13807.4	31.75	0	19.07	30.78	3.63	0	0	0	0	0	1	0
7	2	5	28	4009.82	27.25	0	19.45	30.8	3.85	0	0	0	0	0	1	0
7	2	5	29	3242.44	41.5	0	20.64	30.57	0.44	0	0	0	0	0	1	0
7	2	5	30	2939.25	3	0	14.55	26.02	2.47	0	0	0	0	0	1	0
7	2	5	31	2866.28	17.75	0	16.17	25.2	3.16	0	0	0	0	0	1	0
7	3	6	1	4052.74	9.75	0	16.29	28.25	3.27	0	0	0	0	0	1	0
7	3	6	2	4571.04	91.75	0	20.27	28.97	4.39	0	0	0	0	0	1	0
7	3	6	3	2474.81	100	20.32	20.05	27.3	5.73	1	1	0	0	0	1	0
7	3	6	4	2552.42	74.125	24.62	20.54	27.34	3.15	1	1	0	0	0	1	0
7	3	6	5	2309.51	15	19.87	21.56	31.37	4.8	1	0	0	0	0	1	0
7	3	6	6	2570.37	35.125	7.61	17.85	30.79	2.15	0	0	0	0	0	1	0
7	3	6	7	2859.37	11.625	0	15.36	25.4	2.62	0	0	0	0	0	1	0
7	3	6	8	4758.36	43.5	0	23.26	29.52	3.87	0	0	0	0	0	0	0
7	3	6	9	5581.37	43.75	1.63	22.78	34.2	2.49	0	0	0	0	1	1	0
7	3	6	10	3838.23	31.25	0	20	29.7	4.39	0	0	0	0	0	1	0
7	3	6	11	3331.88	35.25	0	16.15	22.64	2.36	0	0	0	0	0	1	0
7	3	6	12	3483.68	10.375	0	18.37	26.11	0.82	0	0	0	0	0	1	0
7	3	6	13	3996.41	26.125	0	19.43	29.71	4.4	0	0	0	0	0	1	0
7	3	6	14	4659.05	68.75	0	17.09	24.28	6.56	0	0	0	0	0	1	0
7	3	6	15	6822.32	76.125	0.4	15.09	18.83	5.01	0	0	0	0	0	1	0
7	3	6	16	7426.42	60.5	0	12.34	19.84	0.09	0	0	0	0	0	1	0
7	3	6	17	4786.31	36.625	0	17.29	23.93	0.83	0	0	0	0	0	1	0
7	3	6	18	4835.95	10.875	0	21.05	29.37	1.64	0	0	0	0	0	1	0
7	3	6	19	4667.41	10.75	0	23.33	33.82	2.13	0	0	0	0	0	0	0
7	3	6	20	4679.44	56	0	23.96	33.29	1.06	0	0	0	0	0	0	0
7	3	6	21	5487.39	1.5	3.78	18.37	26.98	2.72	0	0	0	0	0	1	0
7	3	6	22	7350.99	5.75	0	19.48	29.04	2.92	0	0	0	0	0	1	0
7	3	6	23	8469.21	7.5	0	17.43	29.17	2.39	0	0	0	0	0	1	0
7	3	6	24	6651.17	26.75	0	17.32	24.71	2.35	0	0	0	0	0	1	0
7	3	6	25	6623.08	87.75	0	22.64	28.19	3.58	0	0	0	0	0	1	0
7	3	6	26	6462.03	100	0.3	23.29	29.6	2.53	0	0	0	0	0	0	0
7	3	6	27	6167.76	69.75	2.99	23.33	32.06	4.42	0	0	0	0	0	0	0
7	3	6	28	5928.07	70.5	0	23.96	33.15	4.76	0	0	0	0	0	0	0
7	3	6	29	8003.18	88.5	0	24.96	34.14	3.11	0	0	0	0	1	0	0
7	3	6	30	11429.5	90.25	7.93	23.21	32.36	0.62	0	0	0	0	0	0	0
7	3	7	1	10751.9	90	0.07	22.17	29.1	3.93	0	0	0	0	0	1	0
7	3	7	2	11677.4	11.625	0	16.28	26.51	3.68	0	0	0	0	0	1	0
7	3	7	3	12901.3	20.25	0	14.59	24.72	1.72	0	0	0	0	0	1	0
7	3	7	4	13435.7	32.75	0	20.41	25.82	4.21	0	0	0	0	0	1	0
7	3	7	5	12863.4	27.375	0	22.1	29.79	6.1	0	0	0	0	0	1	0
7	3	7	6	14017.6	72.125	0	24.87	32.53	3.85	0	0	0	0	0	0	0
7	3	7	7	12076.7	41.25	1.37	21.25	31.47	1.77	0	0	0	0	0	1	0
7	3	7	8	9177.86	32.5	2.95	22.68	31.98	1.79	0	0	0	0	0	1	0
7	3	7	9	9182.99	35.75	1.27	24.97	31.93	2.67	0	0	0	0	0	0	0
7	3	7	10	9037.37	46.875	0	25.56	34.83	3.38	0	0	0	0	1	0	0
7	3	7	11	8692.67	69.25	0	23.25	31.72	3.22	0	0	0	0	0	0	0
7	3	7	12	9480.18	48.25	17.85	23.01	35.26	2.32	1	0	0	0	1	0	0
7	3	7	13	10668.8	87.25	0	22.18	30.34	0.32	0	0	0	0	0	1	0
7	3	7	14	13583.1	44.5	0	18.45	29.01	0.44	0	0	0	0	0	1	0
7	3	7	15	11744.6	57.375	0	23.79	30.93	3.4	0	0	0	0	0	0	0
7	3	7	16	12576.6	95	0	25	32.61	3.7	0	0	0	0	0	0	0
7	3	7	17	12398.8	94.125	1.66	23.86	32.76	2.12	0	0	0	0	0	0	0
7	3	7	18	12746.2	87.75	4.9	23.03	32.07	4.09	0	0	0	0	0	0	0
7	3	7	19	13324.6	35.625	2.47	24.94	32.13	3.38	0	0	0	0	0	0	0
7	3	7	20	14488.2	83.5	6.72	23.37	35.45	0.96	0	0	0	0	1	0	0
7	3	7	21	15153.5	53.375	0	20.79	29.25	5.71	0	0	0	0	0	1	0
7	3	7	22	13746.5	42.25	0	18.05	26.01	6.08	0	0	0	0	0	1	0
7	3	7	23	13739.5	64.25	0	21.68	27.17	5.6	0	0	0	0	0	1	0
7	3	7	24	13442.5	16	0	17.94	27.85	1.93	0	0	0	0	0	1	0
7	3	7	25	12312.2	12.125	0	20.51	28.86	2.1	0	0	0	0	0	1	0
7	3	7	26	11569.1	27.5	0	21.62	29.3	2.66	0	0	0	0	0	1	0
7	3	7	27	13017.9	60.5	0	21.25	29.29	2.51	0	0	0	0	0	1	0
7	3	7	28	13451.8	73.875	5.07	22.1	31.78	2.25	0	0	0	0	0	1	0
7	3	7	29	10437.5	60.625	3.49	22.88	32.06	2.56	0	0	0	0	0	1	0
7	3	7	30	9952.95	96.875	1.42	22.81	30.98	1.93	0	0	0	0	0	1	0
7	3	7	31	10098.2	12.375	24.78	22.12	28.18	3.66	1	1	0	0	0	1	0
7	3	8	1	9424.55	0.5	0	21.8	29.28	2.12	0	0	0	0	0	1	0
7	3	8	2	11272.3	0	0	19.35	30.48	1.71	0	0	0	0	0	1	0
7	3	8	3	13863.8	24.125	0	20.85	31.09	3.09	0	0	0	0	0	1	0
7	3	8	4	15176.8	13.75	0	23.9	31.75	1.93	0	0	0	0	0	0	0
7	3	8	5	10964.1	52.875	0	25.49	34.24	1.69	0	0	0	0	1	0	0
7	3	8	6	10993.3	71	10.01	23.23	34.1	3.41	1	0	0	0	1	0	0
7	3	8	7	11015.6	65.875	0	26.08	33.16	1.22	0	0	0	0	0	0	0
7	3	8	8	10477.9	32.875	2.95	27.73	33.45	3.35	0	0	0	0	0	0	0
7	3	8	9	9948.06	9	0	27.8	38	0.13	0	0	0	0	1	0	0
7	3	8	10	11715.4	40.25	0.14	23.99	34.83	1.27	0	0	0	0	1	0	0
7	3	8	11	13137	40.25	7.07	23.02	33.09	5.08	0	0	0	0	0	0	0
7	3	8	12	9386.08	1	0	17.34	25.99	3.01	0	0	0	0	0	1	0
7	3	8	13	8665.36	6.375	0	19.13	28.74	0.91	0	0	0	0	0	1	0
7	3	8	14	8315.77	1	0	20.28	31.99	2.76	0	0	0	0	0	1	0
7	3	8	15	8430.91	1.25	0	18.49	29.2	2.51	0	0	0	0	0	1	0
7	3	8	16	7857.42	13.625	0	24.88	32.13	4.36	0	0	0	0	0	0	0
7	3	8	17	10247.4	68.625	12.68	21.69	34.32	5.88	1	0	0	0	1	1	0
7	3	8	18	11138.2	16.875	0	23.64	33.06	2.72	0	0	0	0	0	0	0
7	3	8	19	6850.96	43.75	0	18.99	27.67	3.5	0	0	0	0	0	1	0
7	3	8	20	6280.82	56.125	12.58	22.07	30.48	2.77	1	0	0	0	0	1	0
7	3	8	21	5714.83	45.375	0	24.95	30.23	1.33	0	0	0	0	0	0	0
7	3	8	22	5302.87	77.625	28.93	23.02	32.65	2.7	1	1	0	0	0	0	0
7	3	8	23	5224.76	59.75	0.39	22.83	25.92	3.57	0	0	0	0	0	1	0
7	3	8	24	6985.19	12.75	0	20.23	26.07	1.53	0	0	0	0	0	1	0
7	3	8	25	6867.16	16.875	0	23.96	29.81	2.56	0	0	0	0	0	0	0
7	3	8	26	4617.36	64.375	0	24.52	34.35	2.62	0	0	0	0	1	0	0
7	3	8	27	3594.71	46.5	3.45	22.38	31.66	2.71	0	0	0	0	0	1	0
7	3	8	28	3619.67	7	0	22.4	29.11	3.57	0	0	0	0	0	1	0
7	3	8	29	3704.6	3.375	0	19.74	28.27	3.54	0	0	0	0	0	1	0
7	3	8	30	4402.47	6.5	0	17.41	28.15	2.77	0	0	0	0	0	1	0
7	3	8	31	12482.4	21.375	0	18.48	28.19	2.52	0	0	0	0	0	1	0
7	4	9	1	16470.9	27	0	21.87	30.46	4.19	0	0	0	0	0	1	0
7	4	9	2	15483.8	0.125	0	19.7	27.13	5.19	0	0	0	0	0	1	0
7	4	9	3	4368.05	0.625	0	20.08	26.98	2.74	0	0	0	0	0	1	0
7	4	9	4	2974.19	0	0	19.14	28.31	0.77	0	0	0	0	0	1	0
7	4	9	5	2835.09	0	0	19.57	30.84	0.63	0	0	0	0	0	1	0
7	4	9	6	3168.67	9.875	0	20.9	30.63	3.83	0	0	0	0	0	1	0
7	4	9	7	4371.62	3.5	0	20.15	29.45	3.55	0	0	0	0	0	1	0
7	4	9	8	4347.46	0.25	0	17.41	28.5	2.57	0	0	0	0	0	1	0
7	4	9	9	2274.09	34.375	0	23.14	27.93	4.15	0	0	0	0	0	0	0
7	4	9	10	2077.46	22.125	0.9	23.27	29.45	0.85	0	0	0	0	0	0	0
7	4	9	11	2156.38	34.125	0	23.43	31.14	4.7	0	0	0	0	0	0	0
7	4	9	12	2244.38	50.5	0	24.37	34.7	2.13	0	0	0	0	1	0	0
7	4	9	13	2634.26	30.125	0	20.37	28.16	4.74	0	0	0	0	0	1	0
7	4	9	14	3846.6	63.125	0	21.54	27.28	4.71	0	0	0	0	0	1	0
7	4	9	15	4325.89	82.625	0.95	20.11	26.85	2.07	0	0	0	0	0	1	0
7	4	9	16	2399.85	30	0	16.68	24.51	6.31	0	0	0	0	0	1	0
7	4	9	17	2231.53	69.875	0	16.39	22.11	6.78	0	0	0	0	0	1	0
7	4	9	18	2216.41	38.875	0	18.02	22.77	7.25	0	0	0	0	0	1	0
7	4	9	19	2126.28	79.5	0	19.95	23.21	6.79	0	0	0	0	0	1	0
7	4	9	20	2091.18	100	1.29	21.12	23.7	5.67	0	0	0	0	0	1	0
7	4	9	21	2982.48	83.25	2.99	21.74	22.71	3.96	0	0	0	0	0	1	0
7	4	9	22	3171.41	72.5	0	20.89	25.97	1.74	0	0	0	0	0	1	0
7	4	9	23	2469.27	30	6.01	20.46	28.62	1.35	0	0	0	0	0	1	0
7	4	9	24	2066.98	5.125	0	15.84	28.51	2.78	0	0	0	0	0	1	0
7	4	9	25	2052.77	4.5	0	16.27	26.65	2.01	0	0	0	0	0	1	0
7	4	9	26	2413.19	16.75	0	18.63	27.84	3.02	0	0	0	0	0	1	0
7	4	9	27	2743.81	100	0	22.1	31.41	3.09	0	0	0	0	0	1	0
7	4	9	28	4119.01	22.75	7.53	21.29	27.04	1.62	0	0	0	0	0	1	0
7	4	9	29	4480.97	1.125	0	18.29	27.72	6.49	0	0	0	0	0	1	0
7	4	9	30	2403.96	4.375	0	17.86	23.72	5.63	0	0	0	0	0	1	0
7	4	10	1	1950.71	26.75	0	18.26	24.81	5.64	0	0	0	0	0	1	0
7	4	10	2	1782.97	38.75	0	20.49	24.37	5.72	0	0	0	0	0	1	0
7	4	10	3	1811.09	31	0	21.74	26.4	3.56	0	0	0	0	0	1	0
7	4	10	4	1897.18	41	0	19.79	28.32	2.35	0	0	0	0	0	1	0
7	4	10	5	3258.35	100	0	22.78	27.3	4.1	0	0	0	0	0	1	0
7	4	10	6	3265.96	71.5	0.68	22.6	26.55	4.09	0	0	0	0	0	1	0
7	4	10	7	2358.55	22	0.7	20.76	28.03	0.25	0	0	0	0	0	1	0
7	4	10	8	2092.25	48.5	0	22.14	30.54	1.78	0	0	0	0	0	1	0
7	4	10	9	2106.14	16.625	0	22.32	28.72	1.46	0	0	0	0	0	1	0
7	4	10	10	1993.62	84	2.09	23.01	33.69	0.16	0	0	0	0	0	0	0
7	4	10	11	2100.12	40.375	2.05	20.31	26.43	2.77	0	0	0	0	0	1	0
7	4	10	12	2524.79	6	0	10.29	21.57	6.18	0	0	0	0	0	1	0
7	4	10	13	2875.64	15.625	0	12.81	22.06	2.66	0	0	0	0	0	1	0
7	4	10	14	2195.01	2.75	0	11.6	20.56	1.39	0	0	0	0	0	1	0
7	4	10	15	1832.97	4.875	0	11.22	21.59	1.57	0	0	0	0	0	1	0
7	4	10	16	1820.05	41.875	0	11.78	22.8	1.97	0	0	0	0	0	1	0
7	4	10	17	1850.16	61	0	14.39	24.32	2.46	0	0	0	0	0	1	0
7	4	10	18	2064.36	76.75	0	17.48	26.62	3.65	0	0	0	0	0	1	0
7	4	10	19	2428.48	100	0	22.94	28.73	4.72	0	0	0	0	0	1	0
7	4	10	20	2396.03	37.875	3.63	20.22	29.78	2.22	0	0	0	0	0	1	0
7	4	10	21	2257.54	0	0	11.94	25.92	0.72	0	0	0	0	0	1	0
7	4	10	22	2111.04	26.75	0	14.95	25.59	2.7	0	0	0	0	0	1	0
7	4	10	23	2198.27	40.75	0	19.77	26.68	3.57	0	0	0	0	0	1	0
7	4	10	24	2170.54	96.25	0	22.68	29.73	4.48	0	0	0	0	0	1	0
7	4	10	25	1930.49	90.875	20.36	21.09	29.28	2.57	1	1	0	0	0	1	0
7	4	10	26	2233.7	100	14.18	20.64	23.11	4.37	1	0	0	0	0	1	0
7	4	10	27	2027.99	100	15.56	21.83	24.86	3.21	1	0	0	0	0	1	0
7	4	10	28	1759.06	24	5.89	16.58	22.7	6.74	0	0	0	0	0	1	0
7	4	10	29	1843.01	39.125	0	10.94	18.15	6.9	0	0	0	0	0	1	0
7	4	10	30	1847.55	0	0	5.95	14.36	1.8	0	0	0	0	0	1	0
7	4	10	31	1680.74	5.5	0	6.64	17.62	1.8	0	0	0	0	0	1	0
7	4	11	1	1684.88	66.625	0	11	21.1	1.03	0	0	0	0	0	1	0
7	4	11	2	1883.28	34.125	0	15.3	24.31	9.66	0	0	0	0	0	1	0
7	4	11	3	2126.13	70	0	13.03	17.38	9.63	0	0	0	0	0	1	0
7	4	11	4	1977.95	0	0	6.08	17.62	3.18	0	0	0	0	0	1	0
7	4	11	5	1821.99	1.25	0	4.92	17.1	1.82	0	0	0	0	0	1	0
7	4	11	6	1769.67	56	0	9.91	18.21	4	0	0	0	0	0	1	0
7	4	11	7	1557.98	16.375	1.32	3.26	15.49	6.23	0	0	0	0	0	1	0
7	4	11	8	1543.43	51.25	0	3.57	12.21	5.02	0	0	0	0	0	1	0
7	4	11	9	1839.76	76.875	0	4.86	10.61	3.8	0	0	0	0	0	1	0
7	4	11	10	1728.24	88.75	2.16	6.04	13.07	3.32	0	0	0	0	0	1	0
7	4	11	11	1697.52	46.625	0.55	5.91	10.54	5.95	0	0	0	0	0	1	0
7	4	11	12	1613.31	79.125	0	4.45	10.7	2.61	0	0	0	0	0	1	0
7	4	11	13	1567.79	65.75	0	8.68	17.73	4.32	0	0	0	0	0	1	0
7	4	11	14	1524.46	59.75	0	13.44	20.41	1.76	0	0	0	0	0	1	0
7	4	11	15	1560.84	72.75	0	15.62	24.22	3.29	0	0	0	0	0	1	0
7	4	11	16	1640.43	22.625	8.38	3.42	19.06	8.09	0	0	0	0	0	1	0
7	4	11	17	1670.58	23.375	0	0.54	10.45	2.98	0	0	0	0	0	1	0
7	4	11	18	1577.83	20.125	0	2.18	11.74	1.99	0	0	0	0	0	1	0
7	4	11	19	1727.42	56.625	0	5.92	16.16	1.71	0	0	0	0	0	1	0
7	4	11	20	1773.33	60.25	0	8.65	15.78	0.24	0	0	0	0	0	1	0
7	4	11	21	2004.43	47.875	0	8.79	19.64	2.09	0	0	0	0	0	1	0
7	4	11	22	1972.05	52	0	11.81	23.94	5.84	0	0	0	0	0	1	0
7	4	11	23	2293.67	74.375	0.65	7.69	25.09	6.97	0	0	0	0	0	1	0
7	4	11	24	2072.23	35.125	0	3.04	8.9	5.08	0	0	0	0	0	1	0
7	4	11	25	1412.45	77.75	0	4.32	8.24	1.28	0	0	0	0	0	1	0
7	4	11	26	1448.18	92.5	0.45	7.68	15.17	3.49	0	0	0	0	0	1	0
7	4	11	27	1411.15	93.125	6.26	15.18	20.79	2.82	0	0	0	0	0	1	0
7	4	11	28	1405.59	32.25	0	4.72	18.83	4.3	0	0	0	0	0	1	0
7	4	11	29	1459.67	43.75	0	4.46	10.94	0.73	0	0	0	0	0	1	0
7	4	11	30	1458.84	9.75	0	6.31	16.49	3.36	0	0	0	0	0	1	0
7	1	12	1	1603.47	15.25	0	0.49	9.96	3.19	0	0	0	0	0	1	0
7	1	12	2	1401.23	59	0	2.76	10.58	2.68	0	0	0	0	0	1	0
7	1	12	3	1456.14	46.5	2.78	7.88	15.95	5.51	0	0	0	0	0	1	0
7	1	12	4	1401.72	26.375	0	2.3	18.15	7.38	0	0	0	0	0	1	0
7	1	12	5	1360.57	59.625	0	-0.73	7.69	1.36	0	0	0	0	0	1	1
7	1	12	6	1360.57	59.875	0.63	0.66	7.96	5.43	0	0	0	0	0	1	0
7	1	12	7	1381.77	65.875	0	-2.17	3.44	0.26	0	0	0	0	0	1	1
7	1	12	8	1381.77	77.75	0	2.8	10.55	2.59	0	0	0	0	0	1	0
7	1	12	9	1468.58	88.625	0	6.7	15.05	1.68	0	0	0	0	0	1	0
7	1	12	10	1476.14	48.375	0	11.34	17.39	4.05	0	0	0	0	0	1	0
7	1	12	11	1429.59	72.375	0	10.11	25.34	1.06	0	0	0	0	0	1	0
7	1	12	12	1448.54	14.625	0	10.19	16.03	5.13	0	0	0	0	0	1	0
7	1	12	13	1369.01	98.875	0	11.04	25.14	2.87	0	0	0	0	0	1	0
7	1	12	14	1384.09	48.5	0	10.57	20.3	1.2	0	0	0	0	0	1	0
7	1	12	15	1416.72	97.625	0	5.19	13.25	6.3	0	0	0	0	0	1	0
7	1	12	16	1388.19	100	57.23	6.06	18.21	2.13	1	1	1	0	0	1	0
7	1	12	17	1388.19	10.5	3.31	1.82	18.13	8.51	0	0	0	0	0	1	0
7	1	12	18	1388.19	7.625	0	-2.21	6.03	3.46	0	0	0	0	0	1	1
7	1	12	19	1393.83	66.25	0	-1.06	6.08	2.94	0	0	0	0	0	1	1
7	1	12	20	1517.5	33.375	0.63	-0.69	10.98	2.09	0	0	0	0	0	1	1
7	1	12	21	1480.28	80.75	0	-0.24	8.93	5.16	0	0	0	0	0	1	1
7	1	12	22	1472.44	70.25	0	8.21	10.48	6.95	0	0	0	0	0	1	0
7	1	12	23	1620.18	87.625	0.01	8.52	14.05	3.47	0	0	0	0	0	1	0
7	1	12	24	1640.75	46.625	5.97	5.84	20.07	3.78	0	0	0	0	0	1	0
7	1	12	25	1562.94	64.375	0	2.22	13.22	1.28	0	0	0	0	0	1	0
7	1	12	26	1570.42	99.375	2.17	4.5	10.56	7.51	0	0	0	0	0	1	0
7	1	12	27	1604.81	50.625	35.98	4.95	8.8	3.54	1	1	0	0	0	1	0
7	1	12	28	1739.46	31.375	0	2.46	13.77	1.37	0	0	0	0	0	1	0
7	1	12	29	1750.3	95.125	0	2.53	19.25	3.95	0	0	0	0	0	1	0
7	1	12	30	1547.5	100	2.07	9.82	22.47	4.55	0	0	0	0	0	1	0
7	1	12	31	1508.28	40.25	5.93	5.28	11.54	1.93	0	0	0	0	0	1	0
8	1	1	1	1438.67	6	0	3.66	12.69	2.26	0	0	0	0	0	1	0
8	1	1	2	1376.46	23.125	0	0.03	14.89	7.1	0	0	0	0	0	1	0
8	1	1	3	1328.47	7.625	0	-3.74	2.77	9.23	0	0	0	0	0	1	1
8	1	1	4	1328.47	12.5	0	-6.84	0.66	3.29	0	0	0	0	0	1	1
8	1	1	5	1418.97	20.875	0	-4.88	6.54	5.1	0	0	0	0	0	1	1
8	1	1	6	1445.97	69.25	0	-0.06	10.57	3.98	0	0	0	0	0	1	1
8	1	1	7	1391.07	16.25	0	8.49	18.95	4.14	0	0	0	0	0	1	0
8	1	1	8	1407.17	11.5	0	10.6	22.29	3.68	0	0	0	0	0	1	0
8	1	1	9	1364.23	23.625	0	11.35	22.19	4.37	0	0	0	0	0	1	0
8	1	1	10	1335.43	54.375	0	9.77	22.2	2.81	0	0	0	0	0	1	0
8	1	1	11	1420.93	100	0	9.78	19.8	4	0	0	0	0	0	1	0
8	1	1	12	1449.73	55	1.73	10.39	21.74	2.29	0	0	0	0	0	1	0
8	1	1	13	1363.24	91.625	0	6.24	11.55	6.15	0	0	0	0	0	1	0
8	1	1	14	1305.64	50.875	0.16	4.43	10.93	3.31	0	0	0	0	0	1	0
8	1	1	15	1302.58	23	0	-1.42	10.53	5.73	0	0	0	0	0	1	1
8	1	1	16	1373.41	17.25	0	-1.59	5.55	5.56	0	0	0	0	0	1	1
8	1	1	17	1368.51	99.125	0	0.48	5.69	4.26	0	0	0	0	0	1	0
8	1	1	18	1427.84	53.875	14.82	3.22	12.8	2.84	1	0	0	0	0	1	0
8	1	1	19	1419.94	91.125	0	2.98	12.22	2.19	0	0	0	0	0	1	0
8	1	1	20	1391.02	78.875	11.85	0.56	6.88	5.73	1	0	0	0	0	1	0
8	1	1	21	1349.42	3.5	0	-4.98	0.84	4.36	0	0	0	0	0	1	1
8	1	1	22	1284.89	40.5	0.13	-5.63	1.92	1.87	0	0	0	0	0	1	1
8	1	1	23	1284.89	48.125	6.37	2.51	15.01	1.35	0	0	0	0	0	1	0
8	1	1	24	1342.79	63.125	0	0.29	8.94	0.99	0	0	0	0	0	1	0
8	1	1	25	1331.79	24.5	0	-2.33	8.35	6.26	0	0	0	0	0	1	1
8	1	1	26	1287.29	65	0	-4.95	1.83	2.29	0	0	0	0	0	1	1
8	1	1	27	1295.29	74.5	0	-2.89	5.23	3.45	0	0	0	0	0	1	1
8	1	1	28	1268.29	58.25	0	-1.37	6.25	4.9	0	0	0	0	0	1	1
8	1	1	29	1248.07	42.75	0	-0.93	7.9	3.28	0	0	0	0	0	1	1
8	1	1	30	1273.26	49.375	0.55	5.85	14.96	5.63	0	0	0	0	0	1	0
8	1	1	31	1321.48	11.25	0	-1.94	15.97	4.58	0	0	0	0	0	1	1
8	1	2	1	1330.34	100	8.12	2.8	14.27	4.89	0	0	0	0	0	1	0
8	1	2	2	1350.73	7.5	11.41	2	19.53	2.43	1	0	0	0	0	1	0
8	1	2	3	1245.96	17.875	0	2.93	10.94	1.65	0	0	0	0	0	1	0
8	1	2	4	1345.07	49.875	0	5.02	13.64	1.95	0	0	0	0	0	1	0
8	1	2	5	1351.18	39.75	0.55	7.63	19.4	3.79	0	0	0	0	0	1	0
8	1	2	6	1374.86	20.25	0	13.57	23.7	6.34	0	0	0	0	0	1	0
8	1	2	7	1371.56	20.25	0	15.75	25.58	3.23	0	0	0	0	0	1	0
8	1	2	8	1540.43	17.5	0	6.32	17.35	4.34	0	0	0	0	0	1	0
8	1	2	9	1388.04	23.625	0	4.19	10.15	1.63	0	0	0	0	0	1	0
8	1	2	10	1398.73	3.5	0	7.66	18.87	4.47	0	0	0	0	0	1	0
8	1	2	11	1284.07	7.375	0	-3.72	16.62	5.55	0	0	0	0	0	1	1
8	1	2	12	1284.07	57.75	0	-3.15	3.34	3.83	0	0	0	0	0	1	1
8	1	2	13	1284.07	100	17.85	2.56	16.07	5	1	0	0	0	0	1	0
8	1	2	14	1384.3	67.25	20.96	-0.76	20.69	6.6	1	1	0	0	0	1	1
8	1	2	15	1702.59	18.625	0	0.11	6.47	3.75	0	0	0	0	0	1	0
8	1	2	16	1720.51	42	0	4.26	16.59	3.2	0	0	0	0	0	1	0
8	1	2	17	1606.91	31.875	0	1.76	6.45	4.09	0	0	0	0	0	1	0
8	1	2	18	1320.14	100	37.69	7.53	18.64	6.31	1	1	0	0	0	1	0
8	1	2	19	1328.74	5.875	0.84	4.52	21.05	3.81	0	0	0	0	0	1	0
8	1	2	20	1335	37	0	1.53	11.94	1.89	0	0	0	0	0	1	0
8	1	2	21	1439.03	79.625	0	-1.06	15.35	4.85	0	0	0	0	0	1	1
8	1	2	22	1408.41	100	10.1	-1.02	6.07	2.5	1	0	0	0	0	1	1
8	1	2	23	1532.14	95.625	7.17	3.93	7.13	1.4	0	0	0	0	0	1	0
8	1	2	24	1479	79.625	9.07	1.89	6.95	5.28	0	0	0	0	0	1	0
8	1	2	25	1371.51	83.125	0.72	2.82	6.08	0.32	0	0	0	0	0	1	0
8	1	2	26	1318.36	91.625	0	3.94	8.42	3.18	0	0	0	0	0	1	0
8	1	2	27	1340.99	56.5	1	6.06	16.74	4.63	0	0	0	0	0	1	0
8	1	2	28	1367.08	63.75	0	-3.14	7.89	6.14	0	0	0	0	0	1	1
8	1	2	29	1595.57	22.625	0	-3.09	4.39	1.78	0	0	0	0	0	1	1
8	2	3	1	1605.82	44.25	0.98	2.44	10.02	4.72	0	0	0	0	0	1	0
8	2	3	2	1460.98	16	0	2.12	15.8	3.6	0	0	0	0	0	1	0
8	2	3	3	1494.03	5.125	0	3.06	9.81	3.32	0	0	0	0	0	1	0
8	2	3	4	1419.26	23.5	0	7.5	20.33	6.49	0	0	0	0	0	1	0
8	2	3	5	1476.09	54.75	23.85	14.31	22.68	5.29	1	1	0	0	0	1	0
8	2	3	6	1469.59	26.25	0	6.72	18.19	3.64	0	0	0	0	0	1	0
8	2	3	7	1599.75	65.75	0	7.74	12.41	3.36	0	0	0	0	0	1	0
8	2	3	8	1695.16	100	8.7	10.89	20.29	6.56	0	0	0	0	0	1	0
8	2	3	9	1573.62	1.5	5.73	0.66	21.68	6.39	0	0	0	0	0	1	0
8	2	3	10	1481.87	5.5	0	-0.02	9.42	0.28	0	0	0	0	0	1	1
8	2	3	11	1446.92	56.125	0	4.33	11.16	0.49	0	0	0	0	0	1	0
8	2	3	12	1465.85	22.5	0	8.18	12.66	1.55	0	0	0	0	0	1	0
8	2	3	13	1711.72	5.25	0	6.11	17.16	2.19	0	0	0	0	0	1	0
8	2	3	14	1986.09	35.375	0	9.24	18.29	5.47	0	0	0	0	0	1	0
8	2	3	15	1898.13	37.5	0.23	13.27	22.09	1.93	0	0	0	0	0	1	0
8	2	3	16	1676.47	83.875	11.19	7.87	16.59	5.46	1	0	0	0	0	1	0
8	2	3	17	1676.88	39.875	0	3.22	11.25	6.67	0	0	0	0	0	1	0
8	2	3	18	1648.45	59.75	0	2.06	8.83	2.08	0	0	0	0	0	1	0
8	2	3	19	1565.26	87.875	0	6.56	14.36	5.68	0	0	0	0	0	1	0
8	2	3	20	1758.36	57.375	0.55	12.16	23.36	4.64	0	0	0	0	0	1	0
8	2	3	21	2405.58	1.375	0	4.53	14.96	3.84	0	0	0	0	0	1	0
8	2	3	22	2246.75	41.625	0	8.09	16.01	4.01	0	0	0	0	0	1	0
8	2	3	23	2133.07	11	0	5.15	22.11	6.03	0	0	0	0	0	1	0
8	2	3	24	1959.09	70.625	0	5.02	8.38	5.24	0	0	0	0	0	1	0
8	2	3	25	2035.51	25.25	0	4.09	10.38	4.71	0	0	0	0	0	1	0
8	2	3	26	2253.03	16.625	0	6.7	10.06	6.04	0	0	0	0	0	1	0
8	2	3	27	2390.52	12.875	0	9.78	22.03	4.63	0	0	0	0	0	1	0
8	2	3	28	2495.74	12.875	0	13.2	23.79	5.53	0	0	0	0	0	1	0
8	2	3	29	2268.02	68.25	1.26	7.31	26.69	6.16	0	0	0	0	0	1	0
8	2	3	30	1661.19	67	0	5.69	8.76	6.28	0	0	0	0	0	1	0
8	2	3	31	1837.15	92.125	8.94	6.68	12.08	5.23	0	0	0	0	0	1	0
8	2	4	1	1798.88	85.5	0.41	13.57	17.78	6.23	0	0	0	0	0	1	0
8	2	4	2	1887.8	31.625	8.58	11.05	23.16	1.71	0	0	0	0	0	1	0
8	2	4	3	1672.44	72.875	0	6.79	13.05	5.19	0	0	0	0	0	1	0
8	2	4	4	1719.15	80.625	12.74	9.92	15.77	2.69	1	0	0	0	0	1	0
8	2	4	5	1729.9	100	2.95	13.28	23.03	2.18	0	0	0	0	0	1	0
8	2	4	6	1658.43	94.75	15.71	10.13	19.75	6.36	1	0	0	0	0	1	0
8	2	4	7	1418.74	97.75	4.19	7.99	12	7.18	0	0	0	0	0	1	0
8	2	4	8	1418.74	95.25	0.69	7.81	9.22	6.57	0	0	0	0	0	1	0
8	2	4	9	1531.81	34.125	2.16	8.28	9.87	4.94	0	0	0	0	0	1	0
8	2	4	10	1849.8	43.75	1.46	9.38	12.23	1.79	0	0	0	0	0	1	0
8	2	4	11	2055.49	33.875	0	10.59	19.34	3.01	0	0	0	0	0	1	0
8	2	4	12	1977.26	53.375	0	14.96	26.55	6.2	0	0	0	0	0	1	0
8	2	4	13	1778.45	64.75	2.96	13.24	26.97	1.26	0	0	0	0	0	1	0
8	2	4	14	1772.41	82.125	1.01	6.83	16.05	4.04	0	0	0	0	0	1	0
8	2	4	15	1850.9	25.75	0.1	5.72	10.81	6.04	0	0	0	0	0	1	0
8	2	4	16	2207.07	0.125	0	5.39	12.76	4.85	0	0	0	0	0	1	0
8	2	4	17	2000.41	1.375	0	4.79	16.46	2.99	0	0	0	0	0	1	0
8	2	4	18	2483.44	8.5	0	8.68	19.89	1.09	0	0	0	0	0	1	0
8	2	4	19	2435.43	58.875	0	13.77	27.57	2.89	0	0	0	0	0	1	0
8	2	4	20	1688.09	73.625	0	15.85	26.58	5.51	0	0	0	0	0	1	0
8	2	4	21	1733.93	93.375	18.42	13.07	20.9	4.54	1	0	0	0	0	1	0
8	2	4	22	1784.15	100	65.69	13.03	15.47	5.73	1	1	1	0	0	1	0
8	2	4	23	2089.07	77	0.82	14.07	18.71	4.46	0	0	0	0	0	1	0
8	2	4	24	3263.29	1	0	11.38	19.59	0.75	0	0	0	0	0	1	0
8	2	4	25	7067.31	51.375	0	14.27	23.62	1.47	0	0	0	0	0	1	0
8	2	4	26	6940.15	45.375	0	16.77	26.08	3.43	0	0	0	0	0	1	0
8	2	4	27	1867.18	67.25	0	16.7	28.16	1.28	0	0	0	0	0	1	0
8	2	4	28	1596.56	85.375	0	14.03	19.1	2.77	0	0	0	0	0	1	0
8	2	4	29	1501.21	54.25	22.32	12.18	21.83	2.88	1	1	0	0	0	1	0
8	2	4	30	1297.16	6.375	0	10.01	16.69	3	0	0	0	0	0	1	0
8	2	5	1	1630.22	25.625	0	8.45	15.55	3.56	0	0	0	0	0	1	0
8	2	5	2	2850.64	35.625	0	15.5	21.8	5.56	0	0	0	0	0	1	0
8	2	5	3	3950.65	5.25	0.01	16.79	26.49	5.01	0	0	0	0	0	1	0
8	2	5	4	2240.61	66.75	0	19.35	26.96	1.83	0	0	0	0	0	1	0
8	2	5	5	1584.75	25.75	0	14.67	24.42	4.22	0	0	0	0	0	1	0
8	2	5	6	1721.88	18.875	0	12.23	19.32	1.62	0	0	0	0	0	1	0
8	2	5	7	1505.58	3.5	0	13.77	21.93	2.58	0	0	0	0	0	1	0
8	2	5	8	1678.12	56.625	0	18.79	27.19	6.1	0	0	0	0	0	1	0
8	2	5	9	3831.07	100	0.61	20.51	22.98	5.14	0	0	0	0	0	1	0
8	2	5	10	3854.74	52.125	4.82	13.31	26.95	2.95	0	0	0	0	0	1	0
8	2	5	11	2015.3	56.875	0	9.19	18.3	3.75	0	0	0	0	0	1	0
8	2	5	12	2008.37	76.875	20.65	11.17	17.95	4.95	1	1	0	0	0	1	0
8	2	5	13	1857.74	38.875	10.37	9.05	12.95	8.3	1	0	0	0	0	1	0
8	2	5	14	2134.68	22.375	0	6.89	18.65	1.7	0	0	0	0	0	1	0
8	2	5	15	1984.52	64.5	0	14.71	23.73	2.61	0	0	0	0	0	1	0
8	2	5	16	2612.55	100	4.52	17.77	25.33	3.77	0	0	0	0	0	1	0
8	2	5	17	3683.89	24.625	5.8	13.14	26.55	4.14	0	0	0	0	0	1	0
8	2	5	18	1828.59	23.25	0	14.93	23.16	5.42	0	0	0	0	0	1	0
8	2	5	19	1971.26	44.875	7.56	14.08	25.9	4.92	0	0	0	0	0	1	0
8	2	5	20	1797.66	80	0	16.5	21.54	2.68	0	0	0	0	0	1	0
8	2	5	21	2054.52	48.375	14.67	10.82	27.48	1.32	1	0	0	0	0	1	0
8	2	5	22	3368.7	20.25	2.05	12.86	21.73	2.71	0	0	0	0	0	1	0
8	2	5	23	12704.8	5.5	0	12.99	23.14	2.1	0	0	0	0	0	1	0
8	2	5	24	16635.5	28.75	0.04	14.63	20.91	0.69	0	0	0	0	0	1	0
8	2	5	25	15148.5	12	0	12.26	20.82	1.2	0	0	0	0	0	1	0
8	2	5	26	3485.23	13.375	0	13.51	21.68	3.95	0	0	0	0	0	1	0
8	2	5	27	2040.32	38.125	0	18.9	27.16	5.74	0	0	0	0	0	1	0
8	2	5	28	1969.35	89.125	5.91	15.34	29.86	1.53	0	0	0	0	0	1	0
8	2	5	29	1975.25	5	9.6	8.07	16.01	2.26	0	0	0	0	0	1	0
8	2	5	30	2775.15	5.375	0	11.56	20.04	2.94	0	0	0	0	0	1	0
8	2	5	31	2922.77	38.875	0	19.41	25.61	5.23	0	0	0	0	0	1	0
8	3	6	1	2068.66	24.625	0	22.8	30.83	3.1	0	0	0	0	0	1	0
8	3	6	2	2050.41	20.25	0	17.96	31.51	2.28	0	0	0	0	0	1	0
8	3	6	3	1997.7	16.375	0	14.12	23.72	2.32	0	0	0	0	0	1	0
8	3	6	4	2161.7	50.875	0.94	21.6	26.74	5.14	0	0	0	0	0	1	0
8	3	6	5	2131.45	28.5	0	23.66	33.23	1.64	0	0	0	0	0	0	0
8	3	6	6	5052.58	24.375	0	19.48	29.5	3.7	0	0	0	0	0	1	0
8	3	6	7	6255.94	7.625	0	20.77	30.13	0.49	0	0	0	0	0	1	0
8	3	6	8	3942.87	17	0	24.6	35.69	0.77	0	0	0	0	1	0	0
8	3	6	9	3325.92	7.75	0	25.16	34.26	0.36	0	0	0	0	1	0	0
8	3	6	10	3664.53	14	0	24.59	33.81	1.28	0	0	0	0	0	0	0
8	3	6	11	3795.27	4.75	0.58	24.47	36.56	1.77	0	0	0	0	1	0	0
8	3	6	12	4173.54	0.125	0	19.52	28.74	2.57	0	0	0	0	0	1	0
8	3	6	13	7074.83	2.75	0	18.1	29.4	2.63	0	0	0	0	0	1	0
8	3	6	14	7801.71	11.625	0	19.57	28.47	2.34	0	0	0	0	0	1	0
8	3	6	15	3930.44	88	0.52	22.21	31.14	1.74	0	0	0	0	0	1	0
8	3	6	16	3744.55	8	0	20.59	29.35	0.46	0	0	0	0	0	1	0
8	3	6	17	4238.35	46.125	18.83	18.46	31.66	0.89	1	0	0	0	0	1	0
8	3	6	18	4350.56	7.375	0	17.97	28.78	2.86	0	0	0	0	0	1	0
8	3	6	19	4748.53	2.75	0	16.45	25.26	0.43	0	0	0	0	0	1	0
8	3	6	20	7173.23	22.875	10.9	18.34	25.54	0.31	1	0	0	0	0	1	0
8	3	6	21	7732.73	59.625	0	19.85	28.12	2.86	0	0	0	0	0	1	0
8	3	6	22	5157.3	69.25	0	19.01	28.71	2.54	0	0	0	0	0	1	0
8	3	6	23	4660.33	100	0	23.15	28.56	2.93	0	0	0	0	0	0	0
8	3	6	24	4548.53	31.625	1.94	19.61	28.35	1.81	0	0	0	0	0	1	0
8	3	6	25	4987.19	11.75	0	18.46	29.17	0.86	0	0	0	0	0	1	0
8	3	6	26	5225.04	23.75	0	23.35	29.79	3.36	0	0	0	0	0	0	0
8	3	6	27	7373.47	43.625	0	24.48	34.99	4.16	0	0	0	0	1	0	0
8	3	6	28	8889.87	56.375	3.73	23.39	34.43	3.31	0	0	0	0	1	0	0
8	3	6	29	6864.42	53.375	0	25.67	34.93	4.82	0	0	0	0	1	0	0
8	3	6	30	6903.21	100	0.4	21.91	32.79	4.06	0	0	0	0	0	1	0
8	3	7	1	7469.77	77.25	0	20.72	30.99	1.73	0	0	0	0	0	1	0
8	3	7	2	9185.31	45.875	0	19.24	27.73	1.24	0	0	0	0	0	1	0
8	3	7	3	16879.1	1.75	0	20.6	28.07	3.55	0	0	0	0	0	1	0
8	3	7	4	19399.9	27.125	0	22.87	32.43	3.17	0	0	0	0	0	1	0
8	3	7	5	18064.2	96.75	2.83	21.69	33.85	4.04	0	0	0	0	0	1	0
8	3	7	6	8824.98	93.375	39.78	20.73	28.15	3.08	1	1	0	0	0	1	0
8	3	7	7	7700.94	75.375	18.11	20.21	28.76	3.69	1	0	0	0	0	1	0
8	3	7	8	7884.82	63.625	0	23.24	30.93	4.71	0	0	0	0	0	0	0
8	3	7	9	8879.47	84.625	2.94	21.64	32.02	5.3	0	0	0	0	0	1	0
8	3	7	10	9587.52	79.75	3.59	22.22	26.64	2.37	0	0	0	0	0	1	0
8	3	7	11	10830.2	84.125	0	20.81	28.62	1.63	0	0	0	0	0	1	0
8	3	7	12	12601	0	0	18.97	28.17	2.34	0	0	0	0	0	1	0
8	3	7	13	10387	0.125	0	20.25	28.68	1.47	0	0	0	0	0	1	0
8	3	7	14	9757.83	46.625	0	22.84	29.09	1.42	0	0	0	0	0	1	0
8	3	7	15	10140.9	35.5	49.07	22.24	28.62	3.5	1	1	0	0	0	1	0
8	3	7	16	9730.29	0	0	20.77	27.14	4.36	0	0	0	0	0	1	0
8	3	7	17	10731.5	0.5	0	19.61	28.7	3.2	0	0	0	0	0	1	0
8	3	7	18	12424.9	6.625	0	19.12	29.29	1.72	0	0	0	0	0	1	0
8	3	7	19	14866.9	28.75	0	21.76	29.52	2.97	0	0	0	0	0	1	0
8	3	7	20	12372.4	56.875	6.13	23.42	30.5	3.18	0	0	0	0	0	0	0
8	3	7	21	13844.8	15.5	0	22.47	30	1.61	0	0	0	0	0	1	0
8	3	7	22	14521.5	26.875	0	25.16	32.98	1.53	0	0	0	0	0	0	0
8	3	7	23	14488.3	64.875	0	22.92	35.34	3.62	0	0	0	0	1	1	0
8	3	7	24	14298.4	81	46.29	20.74	32.52	2.55	1	1	0	0	0	1	0
8	3	7	25	15357.1	89	12.74	19.44	25.92	1.03	1	0	0	0	0	1	0
8	3	7	26	16347.7	45	0	18.37	27.66	1.46	0	0	0	0	0	1	0
8	3	7	27	13466.9	100	0	22.31	28.88	4.56	0	0	0	0	0	1	0
8	3	7	28	12483	52.5	19.86	21.82	31.55	0.19	1	0	0	0	0	1	0
8	3	7	29	12195.9	58.75	0	22.85	29.29	2.28	0	0	0	0	0	1	0
8	3	7	30	11484	86.125	7.73	24.4	31.68	2.95	0	0	0	0	0	0	0
8	3	7	31	10832.8	77.625	0.1	24.52	33.28	2.18	0	0	0	0	0	0	0
8	3	8	1	12974.4	70	6.11	23.34	32.78	1.09	0	0	0	0	0	0	0
8	3	8	2	12924.8	64.5	0	24.08	31.99	2.09	0	0	0	0	0	0	0
8	3	8	3	9149.32	61.875	0.86	22.4	31.83	1.77	0	0	0	0	0	1	0
8	3	8	4	9337.44	13.75	0	20.79	28.97	0.78	0	0	0	0	0	1	0
8	3	8	5	10020	33.625	0	23.99	30.63	1.93	0	0	0	0	0	0	0
8	3	8	6	10269.6	32.625	0	24.15	30.02	0.75	0	0	0	0	0	0	0
8	3	8	7	11722.1	81.375	0	23.55	32.89	0.92	0	0	0	0	0	0	0
8	3	8	8	14804.8	30.5	0	22	30.48	2.07	0	0	0	0	0	1	0
8	3	8	9	15587	14.75	0	19.18	28.33	2.46	0	0	0	0	0	1	0
8	3	8	10	11073.6	76.875	0	20.44	27.25	2.56	0	0	0	0	0	1	0
8	3	8	11	10247.6	71	17.15	18.71	28.26	1.72	1	0	0	0	0	1	0
8	3	8	12	9957.6	3.375	0	17.29	27.14	3.54	0	0	0	0	0	1	0
8	3	8	13	10466.1	92.375	0	19.82	28.03	1.98	0	0	0	0	0	1	0
8	3	8	14	10613.7	22.25	0	18.48	25.95	0.67	0	0	0	0	0	1	0
8	3	8	15	12071.5	61.875	0	21.07	29.33	2.5	0	0	0	0	0	1	0
8	3	8	16	11702.3	62.375	8.81	20.51	28.99	1.57	0	0	0	0	0	1	0
8	3	8	17	7464.77	45	0	18.81	28.18	1.34	0	0	0	0	0	1	0
8	3	8	18	7004.38	38.5	0	19.2	28.38	1.75	0	0	0	0	0	1	0
8	3	8	19	6652.77	26.5	0	21.1	28.97	2.01	0	0	0	0	0	1	0
8	3	8	20	5914.22	70.25	0	22.32	30.68	2.67	0	0	0	0	0	1	0
8	3	8	21	5610.13	10.75	0	21.67	26.94	4.89	0	0	0	0	0	1	0
8	3	8	22	6836.2	12.75	0	20.11	26.18	5.5	0	0	0	0	0	1	0
8	3	8	23	7459.85	67.625	0	21.34	27.2	4.81	0	0	0	0	0	1	0
8	3	8	24	4312.22	74	0	20.22	27.32	3.04	0	0	0	0	0	1	0
8	3	8	25	3756.26	59.625	0	21.89	27.85	2.53	0	0	0	0	0	1	0
8	3	8	26	3230.66	70.25	0	23.94	32.14	2.14	0	0	0	0	0	0	0
8	3	8	27	3479.4	98.75	0	22.28	25.04	6.08	0	0	0	0	0	1	0
8	3	8	28	4572.78	96.625	1.32	23.06	24.98	6.2	0	0	0	0	0	0	0
8	3	8	29	13776.3	100	1.35	23.92	26.62	3.67	0	0	0	0	0	0	0
8	3	8	30	15636.2	79.5	4.7	23.4	29.66	0.53	0	0	0	0	0	0	0
8	3	8	31	14923	13.375	0.36	21.73	28.42	1.93	0	0	0	0	0	1	0
8	4	9	1	4149.25	0.625	0	18.92	26.91	3.31	0	0	0	0	0	1	0
8	4	9	2	2590.18	0.375	0	17.52	28.66	1.83	0	0	0	0	0	1	0
8	4	9	3	2373.73	20.125	0	18.9	29.44	0.52	0	0	0	0	0	1	0
8	4	9	4	2367.14	3	0	20.17	31.79	1.94	0	0	0	0	0	1	0
8	4	9	5	1870.29	53.375	0	20.79	32.21	4.34	0	0	0	0	0	1	0
8	4	9	6	1822.09	100	15.53	24.93	27.15	6.71	1	0	0	0	0	0	0
8	4	9	7	1765.8	18.625	16.92	21.33	26.98	1.97	1	0	0	0	0	1	0
8	4	9	8	1606.38	86.625	0	19.61	28.16	2.82	0	0	0	0	0	1	0
8	4	9	9	1594.24	93.75	0	22.43	28.49	3.11	0	0	0	0	0	1	0
8	4	9	10	1611.79	100	0	22.83	31.06	1.23	0	0	0	0	0	1	0
8	4	9	11	1882.5	90.5	91.7	21.08	23.79	5.57	1	1	1	0	0	1	0
8	4	9	12	2201.3	66.125	0	20.73	25.74	3.47	0	0	0	0	0	1	0
8	4	9	13	2685.2	61.375	0	22.91	28.28	2.23	0	0	0	0	0	1	0
8	4	9	14	2246.43	50.25	0	24.03	31.02	3.52	0	0	0	0	0	0	0
8	4	9	15	2020.76	18.375	0	24.59	32.77	3.65	0	0	0	0	0	0	0
8	4	9	16	1799.94	95.875	0	22.9	31.5	4.87	0	0	0	0	0	1	0
8	4	9	17	1856.84	75.625	6.92	19.06	23.09	5.9	0	0	0	0	0	1	0
8	4	9	18	2124.89	10.25	0	15.66	22.82	4.82	0	0	0	0	0	1	0
8	4	9	19	3688.95	38.625	0	19.88	25.01	7.16	0	0	0	0	0	1	0
8	4	9	20	3811.58	38.375	0	18.29	22.17	7.16	0	0	0	0	0	1	0
8	4	9	21	2198.5	44	0	17.8	22.14	5.1	0	0	0	0	0	1	0
8	4	9	22	2020.48	90	0	18.24	23.19	3.8	0	0	0	0	0	1	0
8	4	9	23	2059.33	14.25	0	19.41	22.86	7.51	0	0	0	0	0	1	0
8	4	9	24	1902.43	30.875	0	17.44	21.65	9.67	0	0	0	0	0	1	0
8	4	9	25	1987.75	100	19.28	17.87	20.99	10.78	1	0	0	0	0	1	0
8	4	9	26	2791.98	89	74.8	18.08	21.99	4.81	1	1	1	0	0	1	0
8	4	9	27	2841.86	60.125	1.97	21.55	25.15	3.06	0	0	0	0	0	1	0
8	4	9	28	2226.43	90.5	1.6	19.91	26.25	1.98	0	0	0	0	0	1	0
8	4	9	29	2009.77	43.875	0.17	19.34	25.55	2.32	0	0	0	0	0	1	0
8	4	9	30	1816.51	84	0.96	17.98	24.93	1.67	0	0	0	0	0	1	0
8	4	10	1	1688.24	100	13.96	16.92	24.92	1.55	1	0	0	0	0	1	0
8	4	10	2	1759.12	32.5	5.1	11.46	24.25	4.03	0	0	0	0	0	1	0
8	4	10	3	2200.48	20.125	0	11.33	19.96	2.68	0	0	0	0	0	1	0
8	4	10	4	2443.17	0	0	12.63	23.25	1.68	0	0	0	0	0	1	0
8	4	10	5	1796.23	0	0	13.63	23.83	1.9	0	0	0	0	0	1	0
8	4	10	6	2086.77	6.875	0	14.14	25.58	1.56	0	0	0	0	0	1	0
8	4	10	7	2138.48	34	0	15.14	22.89	5.47	0	0	0	0	0	1	0
8	4	10	8	2100.85	36.125	0	8.9	19.3	0.54	0	0	0	0	0	1	0
8	4	10	9	2047.95	93.125	0	14.59	21.84	2.42	0	0	0	0	0	1	0
8	4	10	10	2598.08	100	0	20.15	26.59	2.42	0	0	0	0	0	1	0
8	4	10	11	3050.56	99.75	0	19.03	22.74	6.35	0	0	0	0	0	1	0
8	4	10	12	2366.21	47.625	0	17.91	22.23	5.99	0	0	0	0	0	1	0
8	4	10	13	2091	31.875	0	14.74	22.25	2.93	0	0	0	0	0	1	0
8	4	10	14	2005.97	26	0	13.94	24.44	0.63	0	0	0	0	0	1	0
8	4	10	15	1969.15	59.25	0	15.65	25.34	0.09	0	0	0	0	0	1	0
8	4	10	16	1930.73	14.625	0	16.54	26.56	2.17	0	0	0	0	0	1	0
8	4	10	17	2251.22	100	0	18.29	29.96	3.86	0	0	0	0	0	1	0
8	4	10	18	2148.43	100	19.31	12.14	17.79	6.52	1	0	0	0	0	1	0
8	4	10	19	1731.54	89	0.51	11.45	15.52	8.8	0	0	0	0	0	1	0
8	4	10	20	1725.71	6.375	0	6.18	15.81	5.05	0	0	0	0	0	1	0
8	4	10	21	1638.02	6.75	0	6.8	16.18	3.54	0	0	0	0	0	1	0
8	4	10	22	1732.73	17.625	0	8.65	22.06	6.39	0	0	0	0	0	1	0
8	4	10	23	1919.52	84.125	0	8.19	13.38	5.6	0	0	0	0	0	1	0
8	4	10	24	2099.85	100	0	11.22	14.93	6.6	0	0	0	0	0	1	0
8	4	10	25	2617.48	100	2.72	14.73	18.77	6.36	0	0	0	0	0	1	0
8	4	10	26	1796.13	36.75	2.96	12.43	22.05	2.17	0	0	0	0	0	1	0
8	4	10	27	1765.9	28.25	0	9.42	18.02	1.25	0	0	0	0	0	1	0
8	4	10	28	1815.06	57.25	9.91	4.2	17.24	7.44	0	0	0	0	0	1	0
8	4	10	29	1655.04	7.625	0	3.39	13.22	6.55	0	0	0	0	0	1	0
8	4	10	30	1597.21	16.25	0	4.21	11.81	5.34	0	0	0	0	0	1	0
8	4	10	31	1983.85	2	0	2.42	11.13	2.6	0	0	0	0	0	1	0
8	4	11	1	2028.4	5.125	0	5.31	17.28	2.56	0	0	0	0	0	1	0
8	4	11	2	1622.96	5.5	0	5.73	21.59	1.16	0	0	0	0	0	1	0
8	4	11	3	1554.54	54.375	0	10.29	18.5	5.66	0	0	0	0	0	1	0
8	4	11	4	1566.62	100	11.32	15.23	17.77	6.47	1	0	0	0	0	1	0
8	4	11	5	1644.6	100	17.46	15.41	17.04	7.71	1	0	0	0	0	1	0
8	4	11	6	1540.89	100	26.4	13.85	16.08	7.8	1	1	0	0	0	1	0
8	4	11	7	1773.66	85.625	1.85	14.01	17.1	3.11	0	0	0	0	0	1	0
8	4	11	8	1727.93	52	0	13.81	21.25	3.58	0	0	0	0	0	1	0
8	4	11	9	1421.01	8.25	1.7	8.15	21.76	2.38	0	0	0	0	0	1	0
8	4	11	10	1381.61	4.125	0	6.66	19.56	3.26	0	0	0	0	0	1	0
8	4	11	11	1487.58	8.625	0	4.87	13.93	3.29	0	0	0	0	0	1	0
8	4	11	12	1537.56	64.625	0.38	5.42	11.04	2.81	0	0	0	0	0	1	0
8	4	11	13	1479.08	97.75	0	8.47	14.79	4.05	0	0	0	0	0	1	0
8	4	11	14	1808.1	100	32.64	13.63	17.95	0.76	1	1	0	0	0	1	0
8	4	11	15	1683.62	100	22.23	13.76	21.72	4.7	1	1	0	0	0	1	0
8	4	11	16	1406.02	50.125	19.65	7.25	25.42	5.72	1	0	0	0	0	1	0
8	4	11	17	1392.86	13	0	1.6	12.88	3.67	0	0	0	0	0	1	0
8	4	11	18	1424.35	81	0	2.64	9.99	6.22	0	0	0	0	0	1	0
8	4	11	19	1433.98	27.125	0	0.27	6.1	7.8	0	0	0	0	0	1	0
8	4	11	20	1397.42	53.875	0	-0.07	5.61	3.97	0	0	0	0	0	1	1
8	4	11	21	1413.36	68.75	1.29	1.05	12.06	5.12	0	0	0	0	0	1	0
8	4	11	22	1440.35	18.875	0.35	-2.19	6.14	7.61	0	0	0	0	0	1	1
8	4	11	23	1543.82	46.75	0	-3.93	4.35	2.84	0	0	0	0	0	1	1
8	4	11	24	1559.82	18.25	0	-1.5	6.96	2.55	0	0	0	0	0	1	1
8	4	11	25	1543.82	67.25	10.45	0.42	12.99	3.82	1	0	0	0	0	1	0
8	4	11	26	1797.75	1.875	0	0.63	11.82	4.63	0	0	0	0	0	1	0
8	4	11	27	1936.56	3.25	0	-1.7	9.98	1.7	0	0	0	0	0	1	1
8	4	11	28	1826.15	31.875	0	-0.73	12.39	2.77	0	0	0	0	0	1	1
8	4	11	29	1698.57	71.875	0	4.25	16.76	2.51	0	0	0	0	0	1	0
8	4	11	30	1527.72	100	14.99	7	11.87	2.94	1	0	0	0	0	1	0
8	1	12	1	1361.61	40.375	16.45	9.93	16.1	5.49	1	0	0	0	0	1	0
8	1	12	2	1393.1	26.5	0	2.47	15.9	4.78	0	0	0	0	0	1	0
8	1	12	3	1487.57	0.75	0	-1.09	7.33	2.37	0	0	0	0	0	1	1
8	1	12	4	1401.76	28	0	-0.42	10	4.52	0	0	0	0	0	1	1
8	1	12	5	1580.45	73.75	0.11	4.17	13.37	2.15	0	0	0	0	0	1	0
8	1	12	6	1624.09	43.125	0	-1.45	6.88	1.08	0	0	0	0	0	1	1
8	1	12	7	1440.42	52	0.44	-1.08	9.58	5.55	0	0	0	0	0	1	1
8	1	12	8	1431.94	33.75	0	-2.63	5.99	3.61	0	0	0	0	0	1	1
8	1	12	9	1369.61	27	0	-0.91	6.64	3.96	0	0	0	0	0	1	1
8	1	12	10	1330.92	57.875	0	6.96	18.05	5.81	0	0	0	0	0	1	0
8	1	12	11	1357.91	100	18.9	16.08	20.42	3.94	1	0	0	0	0	1	0
8	1	12	12	1441.4	91.5	54.89	14.36	20.69	3	1	1	1	0	0	1	0
8	1	12	13	1422.34	19.5	0.03	1.23	13.81	4.93	0	0	0	0	0	1	0
8	1	12	14	1367.7	30.5	0	-0.68	5.06	1.65	0	0	0	0	0	1	1
8	1	12	15	1360	44.125	0	1.35	14.94	3.92	0	0	0	0	0	1	0
8	1	12	16	1353.87	74.375	0	9.57	21.77	1.02	0	0	0	0	0	1	0
8	1	12	17	1355.37	83.5	1.72	7.68	9.9	1.04	0	0	0	0	0	1	0
8	1	12	18	1396.36	87.875	1.74	8.02	15.77	2.65	0	0	0	0	0	1	0
8	1	12	19	1459.34	97.125	0	7.83	11.52	2.01	0	0	0	0	0	1	0
8	1	12	20	1456.67	75	0	9.97	19.22	0.52	0	0	0	0	0	1	0
8	1	12	21	1436.68	81.875	15.52	6.1	10.99	1.71	1	0	0	0	0	1	0
8	1	12	22	1488.61	6.25	4.13	-3.08	13.76	8.17	0	0	0	0	0	1	1
8	1	12	23	1551.59	17.5	0	-4.32	0.07	2.43	0	0	0	0	0	1	1
8	1	12	24	1584.68	58.625	0	-2.78	11.43	4.06	0	0	0	0	0	1	1
8	1	12	25	1624.67	65.125	3.53	11.89	18.96	2.68	0	0	0	0	0	1	0
8	1	12	26	1708.38	34.375	0	4.25	15.82	3.94	0	0	0	0	0	1	0
8	1	12	27	1753.36	87.25	0.78	5.26	10.81	1.25	0	0	0	0	0	1	0
8	1	12	28	1657.5	42.375	0	8.24	18.12	4.96	0	0	0	0	0	1	0
8	1	12	29	1786.2	76.125	6.48	9.23	23.86	1.78	0	0	0	0	0	1	0
8	1	12	30	1705.71	0.25	0.11	4.27	11.08	3.08	0	0	0	0	0	1	0
8	1	12	31	1687.93	12.125	0	4.68	13.95	4.02	0	0	0	0	0	1	0
9	1	1	1	1821.8	16.625	0	-3.23	14.85	7.33	0	0	0	0	0	1	1
9	1	1	2	1748.32	49.25	0	-5.5	1.35	3.4	0	0	0	0	0	1	1
9	1	1	3	1502.47	13.875	4.98	0.73	5.29	1.95	0	0	0	0	0	1	0
9	1	1	4	1579.95	39.875	0	-0.41	8.42	0.48	0	0	0	0	0	1	1
9	1	1	5	1543.56	38.5	0	3.39	11.91	1.84	0	0	0	0	0	1	0
9	1	1	6	1508.75	95.75	6.05	6.07	17.51	3.94	0	0	0	0	0	1	0
9	1	1	7	1408.41	90	8.6	6.02	17.84	4.34	0	0	0	0	0	1	0
9	1	1	8	1443.4	27.875	2.22	5.13	21.22	6.3	0	0	0	0	0	1	0
9	1	1	9	1692.05	11.25	0	-1.51	11.09	5.4	0	0	0	0	0	1	1
9	1	1	10	1635.07	53.25	0	-1.52	7.17	2.52	0	0	0	0	0	1	1
9	1	1	11	1463.01	93.875	1.69	3.05	14.98	2.04	0	0	0	0	0	1	0
9	1	1	12	1406.03	85.875	0	1.98	13.88	4.73	0	0	0	0	0	1	0
9	1	1	13	1433.48	92.125	0	-0.52	6.04	1.42	0	0	0	0	0	1	1
9	1	1	14	1433.48	26.5	9.22	0.06	8.78	3.67	0	0	0	0	0	1	0
9	1	1	15	1401.99	31.375	0	-0.14	2.4	3.25	0	0	0	0	0	1	1
9	1	1	16	1484.2	25.125	0	-7.74	5.03	6.33	0	0	0	0	0	1	1
9	1	1	17	1534.92	38.875	0	-8.73	-3.82	2.85	0	0	0	0	0	1	1
9	1	1	18	1514.93	84.5	0	-8.18	1.25	4.83	0	0	0	0	0	1	1
9	1	1	19	1415.37	48.75	8.21	0.09	4.71	3.23	0	0	0	0	0	1	0
9	1	1	20	1415.37	82.5	0	-1.05	6.86	6.53	0	0	0	0	0	1	1
9	1	1	21	1388.38	42.875	0	-4.06	0.06	5.8	0	0	0	0	0	1	1
9	1	1	22	1415.37	1.25	0	-4.42	2.02	4.9	0	0	0	0	0	1	1
9	1	1	23	1422.32	1	0	-2.86	9.18	4.53	0	0	0	0	0	1	1
9	1	1	24	1390.83	48.5	0	1.85	14.81	2.6	0	0	0	0	0	1	0
9	1	1	25	1415.6	28.375	0	-2.88	11.22	4.41	0	0	0	0	0	1	1
9	1	1	26	1385.61	88.375	0	-1.5	2.46	3.15	0	0	0	0	0	1	1
9	1	1	27	1385.61	95.875	0	1.77	4.37	3.18	0	0	0	0	0	1	0
9	1	1	28	1385.61	100	6.11	2.8	6.86	1.86	0	0	0	0	0	1	0
9	1	1	29	1370.27	100	7.08	1.11	19.66	2.11	0	0	0	0	0	1	0
9	1	1	30	1398.07	32.75	0	-1.88	5.4	0.71	0	0	0	0	0	1	1
9	1	1	31	1357.74	12.125	0	-3.24	10.06	4.92	0	0	0	0	0	1	1
9	1	2	1	1339.75	3.5	0	-1.8	5.01	5.33	0	0	0	0	0	1	1
9	1	2	2	1339.75	17.875	0	3.99	15.68	4.77	0	0	0	0	0	1	0
9	1	2	3	1344.07	90.625	0	3.08	16.74	4.06	0	0	0	0	0	1	0
9	1	2	4	1363.71	68.25	0	-1.03	4.26	4.73	0	0	0	0	0	1	1
9	1	2	5	1390.7	39.125	0	-4.94	1.27	7.22	0	0	0	0	0	1	1
9	1	2	6	1363.25	3.125	0	-7.91	-1.63	3.03	0	0	0	0	0	1	1
9	1	2	7	1437.23	6.875	0	-5.37	8.04	4.02	0	0	0	0	0	1	1
9	1	2	8	1369.16	6.875	0	2.57	17.34	4.66	0	0	0	0	0	1	0
9	1	2	9	1453.13	5.375	0	2.53	22.55	2.2	0	0	0	0	0	1	0
9	1	2	10	1448.63	48.25	0	3.96	10.06	2.88	0	0	0	0	0	1	0
9	1	2	11	1429.14	57	0	10.32	21.72	5.39	0	0	0	0	0	1	0
9	1	2	12	1467.13	23.125	0	13.25	22.7	6.32	0	0	0	0	0	1	0
9	1	2	13	1581.6	3.125	0	6.05	19.83	3.5	0	0	0	0	0	1	0
9	1	2	14	1622.98	48	0	1.07	15	2.47	0	0	0	0	0	1	0
9	1	2	15	1487.02	35.5	0	1.9	9.94	3.77	0	0	0	0	0	1	0
9	1	2	16	1402.15	84.625	2.48	0.31	6.89	4.37	0	0	0	0	0	1	0
9	1	2	17	1443.65	59.375	0	0.33	5.1	5.17	0	0	0	0	0	1	0
9	1	2	18	1369.06	65.25	0	-1.67	5.16	4.52	0	0	0	0	0	1	1
9	1	2	19	1433.56	53.375	5.72	4.93	13.75	4.14	0	0	0	0	0	1	0
9	1	2	20	1488.22	6.375	0	-2.66	14.94	6.5	0	0	0	0	0	1	1
9	1	2	21	1497.22	5	0	-3.91	4.1	1.6	0	0	0	0	0	1	1
9	1	2	22	1388.25	97.375	0	-1.55	8.92	2.4	0	0	0	0	0	1	1
9	1	2	23	1405.42	14.25	3.14	-2.68	10.65	6.65	0	0	0	0	0	1	1
9	1	2	24	1405.42	10.75	0	-3.23	4.51	5.94	0	0	0	0	0	1	1
9	1	2	25	1452.86	5.25	0	-5.65	4.08	0.83	0	0	0	0	0	1	1
9	1	2	26	1452.86	13.25	0	-2.03	8.41	3.12	0	0	0	0	0	1	1
9	1	2	27	1532.86	52.375	0	4.64	17.74	3.9	0	0	0	0	0	1	0
9	1	2	28	1431.16	100	1.86	8.78	20.05	1.38	0	0	0	0	0	1	0
9	2	3	1	1527.8	100	25.23	3.8	8.33	7.75	1	1	0	0	0	1	0
9	2	3	2	1573.79	100	33.92	-1.11	4.89	7.86	1	1	0	0	0	1	1
9	2	3	3	1562.64	65	0.31	-6.93	-1.71	6.53	0	0	0	0	0	1	1
9	2	3	4	1495.35	12.75	0	-6.42	0.2	4.09	0	0	0	0	0	1	1
9	2	3	5	1656.21	6.125	0	-3.37	3.81	3.2	0	0	0	0	0	1	1
9	2	3	6	2090.54	31.25	0	0.95	13.18	5.28	0	0	0	0	0	1	0
9	2	3	7	2397.96	12.125	0	7.68	21.46	3.47	0	0	0	0	0	1	0
9	2	3	8	1911.08	43.75	0	13.37	23.93	4.74	0	0	0	0	0	1	0
9	2	3	9	1643.41	32.25	0	16.19	26.48	4.32	0	0	0	0	0	1	0
9	2	3	10	1534.69	16.5	0	5.26	26.91	3.9	0	0	0	0	0	1	0
9	2	3	11	1565.68	46.375	0	6.18	13.52	2.82	0	0	0	0	0	1	0
9	2	3	12	1529.12	60.875	0	8.09	26.15	4.28	0	0	0	0	0	1	0
9	2	3	13	1551.11	98.625	0	4.04	8.18	5.21	0	0	0	0	0	1	0
9	2	3	14	1668.67	99.625	21.68	3.92	4.88	5.08	1	1	0	0	0	1	0
9	2	3	15	1658.28	100	14.96	4.1	6	2.53	1	0	0	0	0	1	0
9	2	3	16	1809.24	99.25	16.93	6.04	8.05	3.1	1	0	0	0	0	1	0
9	2	3	17	1821.49	86.75	16.3	6.73	8.18	5.52	1	0	0	0	0	1	0
9	2	3	18	1771.49	16.625	1.4	1.32	9.12	0.87	0	0	0	0	0	1	0
9	2	3	19	1654.84	31.375	0	3.11	15.25	2.96	0	0	0	0	0	1	0
9	2	3	20	2088.8	57.25	11.32	6.78	22.74	5.15	1	0	0	0	0	1	0
9	2	3	21	2256.65	52.625	0	2.43	9.91	4.47	0	0	0	0	0	1	0
9	2	3	22	1675.23	24	0	1.04	8.82	1.04	0	0	0	0	0	1	0
9	2	3	23	1589.8	9	0	4.21	12.43	1.28	0	0	0	0	0	1	0
9	2	3	24	1583.8	6.625	0	0.79	8.79	4.74	0	0	0	0	0	1	0
9	2	3	25	1606.4	23	0	-1.05	6.07	2.53	0	0	0	0	0	1	1
9	2	3	26	1600.81	90.25	0.8	4.96	8.98	3.24	0	0	0	0	0	1	0
9	2	3	27	1716.69	87.125	3.55	9.91	17.03	0.58	0	0	0	0	0	1	0
9	2	3	28	1978.57	94	18.11	8.26	16.69	0.76	1	0	0	0	0	1	0
9	2	3	29	1748.54	78.75	9.74	12.47	22.59	4.97	0	0	0	0	0	1	0
9	2	3	30	1681.2	26.625	0	8.16	26.07	5.71	0	0	0	0	0	1	0
9	2	3	31	1675.12	9.75	0	5.61	17.11	2.34	0	0	0	0	0	1	0
9	2	4	1	1824.6	75	0	7.2	11.97	4.22	0	0	0	0	0	1	0
9	2	4	2	1972.31	67.5	0	10.39	16.88	2.18	0	0	0	0	0	1	0
9	2	4	3	2278.94	55.75	0.44	12.09	17.99	3.82	0	0	0	0	0	1	0
9	2	4	4	2615.99	1.625	0	10.7	26.36	6.08	0	0	0	0	0	1	0
9	2	4	5	2260.9	8.125	0	6.48	20.98	0.51	0	0	0	0	0	1	0
9	2	4	6	2247.36	79.875	0	13.65	19.76	3.95	0	0	0	0	0	1	0
9	2	4	7	2258.23	46.875	9.12	6.88	21.74	4.81	0	0	0	0	0	1	0
9	2	4	8	2287.55	48	0	2.1	10.75	5.59	0	0	0	0	0	1	0
9	2	4	9	2545.84	41	1.82	6.49	14.18	2.21	0	0	0	0	0	1	0
9	2	4	10	3211	25	0.39	10.36	16.82	4.03	0	0	0	0	0	1	0
9	2	4	11	3264.78	84.125	6.17	15.75	26.61	2.71	0	0	0	0	0	1	0
9	2	4	12	2517.4	14.5	0.4	6.22	19.84	5.03	0	0	0	0	0	1	0
9	2	4	13	2377.47	33.25	0	4.26	13.27	1.49	0	0	0	0	0	1	0
9	2	4	14	2420.92	100	3.88	8	14	3.75	0	0	0	0	0	1	0
9	2	4	15	2305.12	100	13.33	9.97	20.92	4.95	1	0	0	0	0	1	0
9	2	4	16	3063.38	47.625	1.99	5.64	11.06	8.09	0	0	0	0	0	1	0
9	2	4	17	7331.84	2	0	2.52	12.85	2.17	0	0	0	0	0	1	0
9	2	4	18	7480.69	3.625	0	8.12	18.41	2.13	0	0	0	0	0	1	0
9	2	4	19	2816.79	41.5	0	12.85	24.25	2.88	0	0	0	0	0	1	0
9	2	4	20	1912.46	87.75	1.21	11.28	24.14	3.24	0	0	0	0	0	1	0
9	2	4	21	1880.56	86.875	5.6	13.78	22.08	2.78	0	0	0	0	0	1	0
9	2	4	22	2098.57	88.625	4.7	11.84	20.35	2.51	0	0	0	0	0	1	0
9	2	4	23	2146.11	5.625	5.43	8.1	16.74	3.5	0	0	0	0	0	1	0
9	2	4	24	2870.02	6.5	0	7.64	20.89	3.32	0	0	0	0	0	1	0
9	2	4	25	3616.58	14.75	0	16.63	23.26	3.46	0	0	0	0	0	1	0
9	2	4	26	2350.81	15.125	0	18.25	31.49	3.55	0	0	0	0	0	1	0
9	2	4	27	1923.07	4.75	0	17.92	32.03	3.23	0	0	0	0	0	1	0
9	2	4	28	1866.98	6.75	0	16.85	31.84	3.86	0	0	0	0	0	1	0
9	2	4	29	1842.74	26.75	0	17.08	29.29	0.69	0	0	0	0	0	1	0
9	2	4	30	3310.27	53	0	11.81	21.87	4.52	0	0	0	0	0	1	0
9	2	5	1	10007.1	55.375	0	13.09	20.71	4.68	0	0	0	0	0	1	0
9	2	5	2	9863.53	97.25	0	19.11	27.76	4.84	0	0	0	0	0	1	0
9	2	5	3	2055.57	100	0	17.04	27.67	2.12	0	0	0	0	0	1	0
9	2	5	4	1914.15	75.5	8.21	17.15	27.84	3.36	0	0	0	0	0	1	0
9	2	5	5	1843.41	100	5.42	15.09	28.43	0.98	0	0	0	0	0	1	0
9	2	5	6	1898.91	100	14.4	14.24	21.8	1.29	1	0	0	0	0	1	0
9	2	5	7	2020.57	85.5	6.23	17.29	26.24	5.48	0	0	0	0	0	1	0
9	2	5	8	4177.41	61.875	10.33	16.91	27.02	1.75	1	0	0	0	0	1	0
9	2	5	9	4397.13	39.25	16.48	20.81	27	4.51	1	0	0	0	0	1	0
9	2	5	10	2425.16	24.625	0	19.13	31.68	3.1	0	0	0	0	0	1	0
9	2	5	11	2106.44	81.25	0	16.12	23.34	4.3	0	0	0	0	0	1	0
9	2	5	12	2200.82	37.5	2.88	9.35	15.95	2.07	0	0	0	0	0	1	0
9	2	5	13	2333.3	9	0	10.13	20.66	2.92	0	0	0	0	0	1	0
9	2	5	14	2462.99	38.625	0	15.1	19.99	4.9	0	0	0	0	0	1	0
9	2	5	15	3303.15	61.125	0	19.03	24.1	3.84	0	0	0	0	0	1	0
9	2	5	16	3406.28	90.625	13.87	19.91	25.91	3.42	1	0	0	0	0	1	0
9	2	5	17	2534.67	100	10.36	20.62	26.18	1.07	1	0	0	0	0	1	0
9	2	5	18	2086.94	81.5	29.77	10.76	22.75	7.5	1	1	0	0	0	1	0
9	2	5	19	2331.6	15	1.06	11.06	15.03	6.12	0	0	0	0	0	1	0
9	2	5	20	2446.35	3.125	0	9.7	16.11	4.45	0	0	0	0	0	1	0
9	2	5	21	3669.71	4.125	0	11.49	18.37	2.96	0	0	0	0	0	1	0
9	2	5	22	11782.3	12.75	2.7	13.45	22.27	2.72	0	0	0	0	0	1	0
9	2	5	23	15762.5	37.5	0	17.91	26.56	3.42	0	0	0	0	0	1	0
9	2	5	24	14526.1	86.5	0	19.13	26.93	3.75	0	0	0	0	0	1	0
9	2	5	25	3963.91	91.25	0.87	20.68	26	3.2	0	0	0	0	0	1	0
9	2	5	26	2970.32	86.75	0	19.93	27.78	3.01	0	0	0	0	0	1	0
9	2	5	27	2829.75	71.375	0	18.97	24.96	3.59	0	0	0	0	0	1	0
9	2	5	28	2752.81	69.375	0	19	23.92	1.24	0	0	0	0	0	1	0
9	2	5	29	4270.9	83.75	0	20.79	25.25	3.28	0	0	0	0	0	1	0
9	2	5	30	5113.14	56.75	1.28	19.04	30.8	1.85	0	0	0	0	0	1	0
9	2	5	31	2878.56	16.875	0	20.53	26.04	2.71	0	0	0	0	0	1	0
9	3	6	1	2454.28	52.5	1.13	19.03	29.25	3.64	0	0	0	0	0	1	0
9	3	6	2	2593.24	6.5	0	17.52	23.07	2.13	0	0	0	0	0	1	0
9	3	6	3	2230.25	16.875	0	21.22	33.09	3.12	0	0	0	0	0	1	0
9	3	6	4	2473.56	70.625	0	21	31.8	2.07	0	0	0	0	0	1	0
9	3	6	5	4837.2	100	15.74	20.04	25.99	2.14	1	0	0	0	0	1	0
9	3	6	6	5625.05	88	78.28	17.87	27.9	4.05	1	1	1	0	0	1	0
9	3	6	7	3337.45	16.625	0	15.22	21.82	1.46	0	0	0	0	0	1	0
9	3	6	8	2930.42	25.375	0	17.92	23.22	2.44	0	0	0	0	0	1	0
9	3	6	9	2822	91.125	0	21.97	28.3	2.5	0	0	0	0	0	1	0
9	3	6	10	2844.08	29.125	9.43	18.44	30.53	0.61	0	0	0	0	0	1	0
9	3	6	11	3276.77	64.375	0.04	21.98	27.93	2.35	0	0	0	0	0	1	0
9	3	6	12	5354.32	100	0	23.89	29.45	2.94	0	0	0	0	0	0	0
9	3	6	13	6037.28	100	0	22.2	30.05	1.39	0	0	0	0	0	1	0
9	3	6	14	4042.67	54.625	5	20.79	28.87	3.25	0	0	0	0	0	1	0
9	3	6	15	3724.59	58.875	0	17.1	26.08	2.3	0	0	0	0	0	1	0
9	3	6	16	4575.03	57.875	0	18.51	23.17	3.63	0	0	0	0	0	1	0
9	3	6	17	4659.39	62.75	0	19.17	23.34	5.99	0	0	0	0	0	1	0
9	3	6	18	5614.61	100	0.88	20.64	23.26	5.09	0	0	0	0	0	1	0
9	3	6	19	7863.24	65.625	59.62	20.18	28.21	0.9	1	1	1	0	0	1	0
9	3	6	20	8356.64	33.5	0	22.96	28.81	1.78	0	0	0	0	0	1	0
9	3	6	21	5793.56	14.375	0	23.01	33.74	4.81	0	0	0	0	0	0	0
9	3	6	22	5857.47	28.25	0	21.54	28.26	4.29	0	0	0	0	0	1	0
9	3	6	23	5456.98	76.625	7.37	18.31	27.15	1.63	0	0	0	0	0	1	0
9	3	6	24	5618.71	60.75	0	19.24	25.82	1.13	0	0	0	0	0	1	0
9	3	6	25	6656.09	33.125	0	21.3	29.15	0.49	0	0	0	0	0	1	0
9	3	6	26	9058.15	29.25	0	21.79	30.82	2.43	0	0	0	0	0	1	0
9	3	6	27	10341.4	24	0	22.22	32.31	1.2	0	0	0	0	0	1	0
9	3	6	28	7668.26	51.625	0	20.38	29.81	2.75	0	0	0	0	0	1	0
9	3	6	29	7968.48	26.875	0	21.3	26.01	1.47	0	0	0	0	0	1	0
9	3	6	30	8654.65	0.875	0	20.06	30.65	2.31	0	0	0	0	0	1	0
9	3	7	1	8765.09	48.375	0	23.1	32.1	1.57	0	0	0	0	0	0	0
9	3	7	2	13152.3	31.375	1.78	21.11	32.09	2.33	0	0	0	0	0	1	0
9	3	7	3	19179.8	20.875	0.53	20.59	29.4	3.65	0	0	0	0	0	1	0
9	3	7	4	19433	38.125	0	20.33	27.93	3.17	0	0	0	0	0	1	0
9	3	7	5	11796.2	100	0	21.95	28.36	1.59	0	0	0	0	0	1	0
9	3	7	6	8379.21	95.875	9.89	19.17	24.25	1.51	0	0	0	0	0	1	0
9	3	7	7	8742.83	21.5	0.02	17.25	24.1	1.14	0	0	0	0	0	1	0
9	3	7	8	9315.1	27.5	0	19.13	28.01	0.72	0	0	0	0	0	1	0
9	3	7	9	10360.2	65.75	0	20.96	27.23	4.29	0	0	0	0	0	1	0
9	3	7	10	13139.4	10.625	0	18.66	25.65	4.57	0	0	0	0	0	1	0
9	3	7	11	14043.9	19.25	0	14.78	23.48	0.92	0	0	0	0	0	1	0
9	3	7	12	9202.23	87	0	21.49	27.96	3.71	0	0	0	0	0	1	0
9	3	7	13	9877.57	100	8.47	22.07	30.94	0.67	0	0	0	0	0	1	0
9	3	7	14	9891.87	47.75	0	19.5	26.08	2.66	0	0	0	0	0	1	0
9	3	7	15	10326.1	22.125	0	16.43	27.12	0.81	0	0	0	0	0	1	0
9	3	7	16	10973.6	51.375	0	22.72	28.28	4.34	0	0	0	0	0	1	0
9	3	7	17	13388.5	73.25	0	22.9	30.9	3.47	0	0	0	0	0	1	0
9	3	7	18	16247.7	95.625	14.39	21.27	31.11	1.46	1	0	0	0	0	1	0
9	3	7	19	15239.4	48.875	0	18.87	27.8	1.52	0	0	0	0	0	1	0
9	3	7	20	16126.9	42.5	0	22.77	26.38	4.28	0	0	0	0	0	1	0
9	3	7	21	15988.6	69.625	0.51	20.71	25.91	1.37	0	0	0	0	0	1	0
9	3	7	22	16216	49.25	0	19.34	27.24	2.12	0	0	0	0	0	1	0
9	3	7	23	16009.8	100	3.84	21.78	28.04	1.25	0	0	0	0	0	1	0
9	3	7	24	17106.5	86.75	1.21	22.87	27.69	2.08	0	0	0	0	0	1	0
9	3	7	25	17198.7	13.625	0	21.02	28.91	3.23	0	0	0	0	0	1	0
9	3	7	26	14990.4	30.5	0	24.15	31.07	4.77	0	0	0	0	0	0	0
9	3	7	27	15553.3	92.375	0.06	22.98	33.82	4.34	0	0	0	0	0	1	0
9	3	7	28	15289.2	81.625	8.12	21.71	32.01	4.12	0	0	0	0	0	1	0
9	3	7	29	14675.9	83.5	0	24.03	32.04	5.41	0	0	0	0	0	0	0
9	3	7	30	14196.7	65.25	5.6	23.81	32.08	3.77	0	0	0	0	0	0	0
9	3	7	31	15257.7	87.875	0	24.13	31.16	5.3	0	0	0	0	0	0	0
9	3	8	1	16666.3	77.125	1.06	23.11	34.07	2.68	0	0	0	0	1	0	0
9	3	8	2	13599.9	100	0	23.98	28.96	3.66	0	0	0	0	0	0	0
9	3	8	3	14373.1	56.375	4.06	23.18	30.78	1.65	0	0	0	0	0	0	0
9	3	8	4	14113.3	70.875	1.07	22.11	29.47	2.24	0	0	0	0	0	1	0
9	3	8	5	13490.2	66	4.5	23.19	30.13	3.42	0	0	0	0	0	0	0
9	3	8	6	14550.7	100	22.88	21.17	34.05	2.85	1	1	0	0	1	1	0
9	3	8	7	16960.4	26.125	11.72	20.2	27.73	3.57	1	0	0	0	0	1	0
9	3	8	8	17017	82.75	0	20.23	27.87	2.08	0	0	0	0	0	1	0
9	3	8	9	13937.9	62.75	5.63	22.92	29.26	3.95	0	0	0	0	0	1	0
9	3	8	10	14161.2	16.875	0	24.17	34.16	2.71	0	0	0	0	1	0	0
9	3	8	11	13472.2	16	0	25.16	34.8	1.59	0	0	0	0	1	0	0
9	3	8	12	12248.7	93.25	0	25.02	33.13	0.53	0	0	0	0	0	0	0
9	3	8	13	12175	89.875	7.7	22.88	30.92	0.38	0	0	0	0	0	1	0
9	3	8	14	13669.3	84.625	5.28	22.85	27.14	2.74	0	0	0	0	0	1	0
9	3	8	15	13687.5	88.625	22.01	22.87	26.1	3.39	1	1	0	0	0	1	0
9	3	8	16	9630.91	26.5	0	21.03	27.81	2.08	0	0	0	0	0	1	0
9	3	8	17	8726.65	53.875	0	19.5	28.22	1.2	0	0	0	0	0	1	0
9	3	8	18	8029.5	69.125	0	22.85	30.03	3.03	0	0	0	0	0	1	0
9	3	8	19	7303.49	77.75	0	24.04	33.11	4.19	0	0	0	0	0	0	0
9	3	8	20	7465.84	84.375	0	24.2	33.16	4.11	0	0	0	0	0	0	0
9	3	8	21	8479.98	95.25	0	25.1	33.16	4.46	0	0	0	0	0	0	0
9	3	8	22	8234.87	97.25	0.04	25.52	32.14	2.91	0	0	0	0	0	0	0
9	3	8	23	4462.35	83.375	41.36	21.13	30.73	1.1	1	1	0	0	0	1	0
9	3	8	24	3511.48	97.25	0	21.51	27.19	0.71	0	0	0	0	0	1	0
9	3	8	25	4041.79	86.25	16.27	20.79	28.93	2.55	1	0	0	0	0	1	0
9	3	8	26	4005.38	57.375	0	22.07	28.88	1.65	0	0	0	0	0	1	0
9	3	8	27	4188.29	57.75	0	22.95	32.08	2.34	0	0	0	0	0	1	0
9	3	8	28	5286.09	69.25	2.3	22.82	32.13	3.72	0	0	0	0	0	1	0
9	3	8	29	5133.58	81.625	6.2	22.79	29.48	0.85	0	0	0	0	0	1	0
9	3	8	30	3089.9	86.75	0	23.12	30.9	2.36	0	0	0	0	0	0	0
9	3	8	31	2441.38	100	2.96	21.88	29.81	3.1	0	0	0	0	0	1	0
9	4	9	1	2474.92	100	14.15	18.1	22.3	6.23	1	0	0	0	0	1	0
9	4	9	2	2752.66	83.625	0	19.22	24.32	6.71	0	0	0	0	0	1	0
9	4	9	3	4510.03	92.875	0	20.13	24.29	6	0	0	0	0	0	1	0
9	4	9	4	13724.8	54.375	0.01	20.53	23.34	5.88	0	0	0	0	0	1	0
9	4	9	5	18583.8	15.125	0	17.48	26.92	3.25	0	0	0	0	0	1	0
9	4	9	6	17325.7	31.25	0	18.49	27.8	3.44	0	0	0	0	0	1	0
9	4	9	7	3814	100	0.71	22.93	27.03	6.52	0	0	0	0	0	1	0
9	4	9	8	2781.05	100	36.23	20.94	24.19	7.59	1	1	0	0	0	1	0
9	4	9	9	2729.48	55.125	36.41	19.13	22.22	6.27	1	1	0	0	0	1	0
9	4	9	10	2721.08	100	1.52	19.21	24.34	6	0	0	0	0	0	1	0
9	4	9	11	2799.97	94.125	18.51	16.72	21.02	5.95	1	0	0	0	0	1	0
9	4	9	12	3217.42	60.25	0	16.2	24.85	1.48	0	0	0	0	0	1	0
9	4	9	13	2514.2	49.125	0	18.79	24.81	4.28	0	0	0	0	0	1	0
9	4	9	14	2186.21	2.375	0	16.94	25.75	1.35	0	0	0	0	0	1	0
9	4	9	15	2401.33	12.5	0	18.36	26.78	1.04	0	0	0	0	0	1	0
9	4	9	16	2796.42	78.25	0	19.69	28.95	1.55	0	0	0	0	0	1	0
9	4	9	17	2617.29	98.875	0	22.02	26.31	5.64	0	0	0	0	0	1	0
9	4	9	18	2675.07	77	0	17.81	23.29	2.98	0	0	0	0	0	1	0
9	4	9	19	3028.34	50	0	16.5	24.36	1.56	0	0	0	0	0	1	0
9	4	9	20	2160.8	15.375	0	15.95	23.29	5.01	0	0	0	0	0	1	0
9	4	9	21	2212.7	11.75	0	17.31	22.35	3.36	0	0	0	0	0	1	0
9	4	9	22	2311.68	62.375	0	21.1	26	3.62	0	0	0	0	0	1	0
9	4	9	23	2711.13	87.125	0	22.17	26.88	1.89	0	0	0	0	0	1	0
9	4	9	24	2921.02	83	0.02	21.89	28.9	1.93	0	0	0	0	0	1	0
9	4	9	25	3625.89	100	10.04	22.86	29.47	3	1	0	0	0	0	1	0
9	4	9	26	4329.13	90.25	0.32	19.08	22.73	7.04	0	0	0	0	0	1	0
9	4	9	27	2816.65	100	10.79	19.82	22.09	3.7	1	0	0	0	0	1	0
9	4	9	28	2078.16	25.25	1.09	14.81	26	4.1	0	0	0	0	0	1	0
9	4	9	29	2000.32	31.875	10.16	13.34	27.81	5.21	1	0	0	0	0	1	0
9	4	9	30	2036.13	47.625	0	12.16	21.92	4.31	0	0	0	0	0	1	0
9	4	10	1	2125.24	47.125	0	14.03	21.12	2.49	0	0	0	0	0	1	0
9	4	10	2	2637.16	52.5	0	12.72	20.4	3.22	0	0	0	0	0	1	0
9	4	10	3	2652.65	100	0.17	18.15	24.4	4.01	0	0	0	0	0	1	0
9	4	10	4	2165.6	14.625	0	15.42	27.04	2.65	0	0	0	0	0	1	0
9	4	10	5	1913.93	70.25	0	16.05	25.64	1.7	0	0	0	0	0	1	0
9	4	10	6	1860.86	77.125	0	13.35	22.25	3.74	0	0	0	0	0	1	0
9	4	10	7	1777.9	52.375	0	17.18	21.95	4.76	0	0	0	0	0	1	0
9	4	10	8	2028.95	9.875	0	14.01	26.88	4.43	0	0	0	0	0	1	0
9	4	10	9	3376.29	37.125	0	14	20	4.97	0	0	0	0	0	1	0
9	4	10	10	3679.72	58	0	18.1	29.26	4.02	0	0	0	0	0	1	0
9	4	10	11	2286.34	64.5	7.49	16.16	27.11	4.97	0	0	0	0	0	1	0
9	4	10	12	2115.61	70.75	0	12.9	19.44	4.51	0	0	0	0	0	1	0
9	4	10	13	2161.25	64	0.56	14.68	19.2	3.19	0	0	0	0	0	1	0
9	4	10	14	2112.38	88.5	0	12.77	23.69	6.64	0	0	0	0	0	1	0
9	4	10	15	2053.76	100	25.73	12.87	16.66	4.06	1	1	0	0	0	1	0
9	4	10	16	2736.86	100	11.77	13.02	17.84	4.13	1	0	0	0	0	1	0
9	4	10	17	3359.76	100	10.93	8.93	13.67	5.3	1	0	0	0	0	1	0
9	4	10	18	2282.93	100	0.54	7.89	10.96	7.2	0	0	0	0	0	1	0
9	4	10	19	2238.43	43.75	7.15	8.81	10.07	6.66	0	0	0	0	0	1	0
9	4	10	20	2043.47	0.875	0	3.82	13.93	2.01	0	0	0	0	0	1	0
9	4	10	21	1948.65	4.25	0	8.21	19.84	1.57	0	0	0	0	0	1	0
9	4	10	22	2068.63	26.5	0	10.27	23.83	2.91	0	0	0	0	0	1	0
9	4	10	23	2314.59	45.75	0	13.26	23.84	3.05	0	0	0	0	0	1	0
9	4	10	24	2855.23	87.125	0	16.94	26.48	6.04	0	0	0	0	0	1	0
9	4	10	25	2159.36	93.375	1.19	14.14	28.04	3.08	0	0	0	0	0	1	0
9	4	10	26	2056.12	75.75	0	11.67	15.88	5.69	0	0	0	0	0	1	0
9	4	10	27	1996.42	88.125	1.15	14.84	19.6	2.56	0	0	0	0	0	1	0
9	4	10	28	1941.69	82	1.65	15.21	22.64	1.53	0	0	0	0	0	1	0
9	4	10	29	1976.67	71.125	0.01	14.91	24.73	4.06	0	0	0	0	0	1	0
9	4	10	30	2223.81	95.5	0	13.26	16.1	4.2	0	0	0	0	0	1	0
9	4	10	31	2092.81	56.875	0	15.65	20.09	3.36	0	0	0	0	0	1	0
9	4	11	1	1948.9	98.5	0.71	13.81	26.65	3.03	0	0	0	0	0	1	0
9	4	11	2	1782.49	99.875	5.95	12.02	15.9	7.53	0	0	0	0	0	1	0
9	4	11	3	1807.59	53.125	0.52	9.39	14.42	3.7	0	0	0	0	0	1	0
9	4	11	4	1752.82	4.25	0	8.96	18.2	3.33	0	0	0	0	0	1	0
9	4	11	5	1802.11	60.625	1.06	8.32	15.31	2.1	0	0	0	0	0	1	0
9	4	11	6	2217.98	6.25	0	8.47	16.15	5.89	0	0	0	0	0	1	0
9	4	11	7	3147.98	5	0	2.85	12.3	1.2	0	0	0	0	0	1	0
9	4	11	8	2094.42	0.25	0	4.92	16.18	2.66	0	0	0	0	0	1	0
9	4	11	9	1814.11	16.875	0	7.85	21.4	1.54	0	0	0	0	0	1	0
9	4	11	10	1871.1	100	0	9.07	22.8	1.9	0	0	0	0	0	1	0
9	4	11	11	1907.94	100	12.13	13.77	20.43	7.52	1	0	0	0	0	1	0
9	4	11	12	1776.03	100	119.66	13.27	14.35	11.9	1	1	1	1	0	1	0
9	4	11	13	1823.71	100	123.26	12.97	15.8	9.86	1	1	1	1	0	1	0
9	4	11	14	1865.51	92.125	20.14	12.83	14.31	6.65	1	1	0	0	0	1	0
9	4	11	15	1894.81	59.625	0.7	12.79	14.08	3.77	0	0	0	0	0	1	0
9	4	11	16	1907.67	2.375	0	10.22	19.47	1.97	0	0	0	0	0	1	0
9	4	11	17	1914.93	45.5	0	9.49	19.21	3.42	0	0	0	0	0	1	0
9	4	11	18	1891.07	78.875	0	12.04	15.92	6.28	0	0	0	0	0	1	0
9	4	11	19	1984.66	73.25	0	14.92	17.25	4.64	0	0	0	0	0	1	0
9	4	11	20	2205.99	94.125	3.49	15.88	20.37	1.72	0	0	0	0	0	1	0
9	4	11	21	2326.89	54.5	0	9.67	16.06	4.41	0	0	0	0	0	1	0
9	4	11	22	1884.63	85.5	0	7.12	13.45	4.58	0	0	0	0	0	1	0
9	4	11	23	1853.14	89	1.63	10.45	14.95	6.2	0	0	0	0	0	1	0
9	4	11	24	1925.86	77.25	1.9	11.92	15.87	2.45	0	0	0	0	0	1	0
9	4	11	25	2275.95	67.875	3.12	11.64	13.88	0.75	0	0	0	0	0	1	0
9	4	11	26	2281.46	53.75	0.36	8.7	13.93	0.79	0	0	0	0	0	1	0
9	4	11	27	2235.44	67.625	4.04	5.06	15.13	4.55	0	0	0	0	0	1	0
9	4	11	28	2079.58	10.5	0.25	1.93	11.21	6.61	0	0	0	0	0	1	0
9	4	11	29	1880.65	15	0	3.73	12.9	3.21	0	0	0	0	0	1	0
9	4	11	30	1870.09	56.375	0	6.83	19.74	6.02	0	0	0	0	0	1	0
9	1	12	1	1801.51	24.375	8.21	4.92	20.51	4.21	0	0	0	0	0	1	0
9	1	12	2	1805.42	83.25	0	4.25	12.4	3.65	0	0	0	0	0	1	0
9	1	12	3	1749.2	77	27.1	11.6	20.65	5.19	1	1	0	0	0	1	0
9	1	12	4	1837.08	89.25	0	7.85	19.37	2.97	0	0	0	0	0	1	0
9	1	12	5	1840.75	96.75	8.31	7.7	12.57	4.64	0	0	0	0	0	1	0
9	1	12	6	1870.15	43.625	8.64	2.05	12.09	6.24	0	0	0	0	0	1	0
9	1	12	7	1967.32	62.5	0	0.35	6.07	0.79	0	0	0	0	0	1	0
9	1	12	8	1848.27	35.625	0	2.49	12.24	2.94	0	0	0	0	0	1	0
9	1	12	9	1845.27	100	39.82	6.25	18.48	4.6	1	1	0	0	0	1	0
9	1	12	10	1843.01	23.625	7.53	10.81	22.84	5.6	0	0	0	0	0	1	0
9	1	12	11	1759.04	16.375	0	-0.71	11.08	6.66	0	0	0	0	0	1	1
9	1	12	12	1720.52	16.625	0	-2.6	3.34	3.1	0	0	0	0	0	1	1
9	1	12	13	1713.94	94.375	0	-1.76	12.82	4.5	0	0	0	0	0	1	1
9	1	12	14	1668.95	24.625	19.24	3.16	16.72	1.12	1	0	0	0	0	1	0
9	1	12	15	1626.04	66.5	0	3.33	11.34	2.6	0	0	0	0	0	1	0
9	1	12	16	1628.87	32.125	0	5.05	15.55	5.51	0	0	0	0	0	1	0
9	1	12	17	1628.28	2.375	0	-0.85	6.33	5.97	0	0	0	0	0	1	1
9	1	12	18	1656.54	51.5	0	-1.12	4.24	3	0	0	0	0	0	1	1
9	1	12	19	1632.22	96.875	31.44	1.58	9.38	8.9	1	1	0	0	0	1	0
9	1	12	20	1589.08	72.375	14.15	-1.73	9.46	7.32	1	0	0	0	0	1	1
9	1	12	21	1645.07	8.625	0	-0.92	4.02	6.06	0	0	0	0	0	1	1
9	1	12	22	1684.29	10.125	0	-2.26	6.17	4.39	0	0	0	0	0	1	1
9	1	12	23	1610.48	55.125	0	-2.39	6.31	2.88	0	0	0	0	0	1	1
9	1	12	24	1644.88	10.5	0	-1.44	7.04	3.97	0	0	0	0	0	1	1
9	1	12	25	1820.33	56.75	0	0.25	7.89	5.65	0	0	0	0	0	1	0
9	1	12	26	1837.32	65.5	40.59	7.99	14.04	3.31	1	1	0	0	0	1	0
9	1	12	27	1702.01	42.75	0.1	4.36	15.96	1.84	0	0	0	0	0	1	0
9	1	12	28	1690.67	32.875	0	4.11	11.2	4.13	0	0	0	0	0	1	0
9	1	12	29	1684.18	41.375	0	0.19	8.34	7.13	0	0	0	0	0	1	0
9	1	12	30	1596.11	40.5	0	-2.09	4.14	3.85	0	0	0	0	0	1	1
9	1	12	31	1713.69	88.375	10.9	-1.69	3.44	0.58	1	0	0	0	0	1	1
10	1	1	1	1594.26	77.375	4.59	3.15	8.23	3.04	0	0	0	0	0	1	0
10	1	1	2	1517.45	56.375	0.14	-1.85	6.13	8.32	0	0	0	0	0	1	1
10	1	1	3	1536.44	15.875	0	-5.94	0.99	10.11	0	0	0	0	0	1	1
10	1	1	4	1536.44	50	0	-5.95	1.05	7.51	0	0	0	0	0	1	1
10	1	1	5	1509.45	67.25	0	-5.76	2.34	5.99	0	0	0	0	0	1	1
10	1	1	6	1489.35	43.5	0	-5.6	2.07	6.59	0	0	0	0	0	1	1
10	1	1	7	1483.86	32.375	0	-3.91	5.08	5.16	0	0	0	0	0	1	1
10	1	1	8	1461.68	82.125	1.16	-3.1	4.59	3.45	0	0	0	0	0	1	1
10	1	1	9	1434.69	64.5	0	-4.03	3.99	6.81	0	0	0	0	0	1	1
10	1	1	10	1406.31	27.375	0	-4.1	1.32	6.45	0	0	0	0	0	1	1
10	1	1	11	1446.3	15.125	0	-6.3	-0.33	3.58	0	0	0	0	0	1	1
10	1	1	12	1388.57	80.875	0	-6.01	5.9	3.16	0	0	0	0	0	1	1
10	1	1	13	1400.82	34.25	0	-2.82	3.16	5.24	0	0	0	0	0	1	1
10	1	1	14	1442.93	7.125	0	-2.64	6.26	2.45	0	0	0	0	0	1	1
10	1	1	15	1665.83	24.875	0	-1.95	10.6	2.61	0	0	0	0	0	1	1
10	1	1	16	1670.83	15.625	0	-0.75	15.02	0.82	0	0	0	0	0	1	1
10	1	1	17	1434.73	100	7.62	0.09	12.35	3.67	0	0	0	0	0	1	0
10	1	1	18	1405.62	65.125	18.17	6.14	18.86	3.97	1	0	0	0	0	1	0
10	1	1	19	1394.03	10	0	3.08	12.5	2.72	0	0	0	0	0	1	0
10	1	1	20	1362.54	44.5	0	4.13	17.28	0.41	0	0	0	0	0	1	0
10	1	1	21	1380.74	88.875	3.84	2.92	8.13	5.5	0	0	0	0	0	1	0
10	1	1	22	1390.74	96	17.58	3.15	7.87	7.4	1	0	0	0	0	1	0
10	1	1	23	1390.74	17.125	0.33	1.23	7.08	4.5	0	0	0	0	0	1	0
10	1	1	24	1489.27	81.25	0	2.88	8.66	3.2	0	0	0	0	0	1	0
10	1	1	25	1429.27	87.375	6.65	9.05	18.12	6.86	0	0	0	0	0	1	0
10	1	1	26	1453.26	30.875	16.14	4.25	17.91	4.95	1	0	0	0	0	1	0
10	1	1	27	1524.25	41.875	0	-0.09	11	3.92	0	0	0	0	0	1	1
10	1	1	28	1451.53	29.75	0	-0.21	8.02	4.24	0	0	0	0	0	1	1
10	1	1	29	1397.55	51	0	-2.01	15.05	5.68	0	0	0	0	0	1	1
10	1	1	30	1400.62	99.25	17.74	-3.84	0.43	6.55	1	0	0	0	0	1	1
10	1	1	31	1400.62	65.875	11.02	-5	-0.03	7.38	1	0	0	0	0	1	1
10	1	2	1	1406.32	21.75	0	-8.26	-0.72	2.54	0	0	0	0	0	1	1
10	1	2	2	1504.87	58.25	0	-6.23	5.2	1.06	0	0	0	0	0	1	1
10	1	2	3	1578.87	66.375	15.52	-1.4	6.07	5.37	1	0	0	0	0	1	1
10	1	2	4	1552.68	66.625	0	1.38	6.13	5.33	0	0	0	0	0	1	0
10	1	2	5	1552.68	98.875	0	1.18	4.48	2.96	0	0	0	0	0	1	0
10	1	2	6	1552.68	100	68.73	3.62	9.07	3.42	1	1	1	0	0	1	0
10	1	2	7	1601.21	41.75	4.54	-3	5.92	6.95	0	0	0	0	0	1	1
10	1	2	8	1557.05	9.25	0	-2.97	2.13	4.66	0	0	0	0	0	1	1
10	1	2	9	1517.06	42.875	0	-4.15	3.48	0.75	0	0	0	0	0	1	1
10	1	2	10	1517.35	97.125	13.5	-1.91	5.32	4.8	1	0	0	0	0	1	1
10	1	2	11	1517.35	36.375	0.32	-2.71	2.82	9.29	0	0	0	0	0	1	1
10	1	2	12	1544.34	53	0	-0.94	7.33	4.31	0	0	0	0	0	1	1
10	1	2	13	1614.32	88.125	0.24	-0.88	3.32	4.85	0	0	0	0	0	1	1
10	1	2	14	1587.33	16.875	0.3	-3.61	1.09	5.33	0	0	0	0	0	1	1
10	1	2	15	1520.14	40.75	0	-2.83	6.13	2.56	0	0	0	0	0	1	1
10	1	2	16	1520.14	65.875	0	-1.59	12.07	5.36	0	0	0	0	0	1	1
10	1	2	17	1582.11	37.5	0	-3.53	5.03	5.4	0	0	0	0	0	1	1
10	1	2	18	1555.12	31.625	0	-1.74	5.87	6.04	0	0	0	0	0	1	1
10	1	2	19	1602.1	0.75	0	-0.74	10.75	4.77	0	0	0	0	0	1	1
10	1	2	20	1808.54	8.125	0	-1.23	10.95	3.73	0	0	0	0	0	1	1
10	1	2	21	1595.4	8	0	-2.15	11.63	2.02	0	0	0	0	0	1	1
10	1	2	22	1663.67	53	0	0.64	13.84	2.32	0	0	0	0	0	1	0
10	1	2	23	1666.28	68.125	6.99	4.75	12.11	2.79	0	0	0	0	0	1	0
10	1	2	24	1680.52	63.625	0.39	3.09	8.5	4.31	0	0	0	0	0	1	0
10	1	2	25	1722.83	83.875	9.55	1.17	6.97	5.65	0	0	0	0	0	1	0
10	1	2	26	1649.83	34.25	0	-0.7	8.14	8.91	0	0	0	0	0	1	1
10	1	2	27	1832.32	58.25	0	1.06	9.28	5.31	0	0	0	0	0	1	0
10	1	2	28	1613.44	60.375	0	-1.76	8.33	3.57	0	0	0	0	0	1	1
10	2	3	1	1631.1	42	0	1.17	9.37	5.14	0	0	0	0	0	1	0
10	2	3	2	1649.25	80	0	0.91	11.99	2.39	0	0	0	0	0	1	0
10	2	3	3	1635.15	97.125	46.27	0.7	5.97	9.38	1	1	0	0	0	1	0
10	2	3	4	1719.56	53	9.65	1.17	3.96	5.52	0	0	0	0	0	1	0
10	2	3	5	1745.56	21.125	0	1.71	9.01	4.29	0	0	0	0	0	1	0
10	2	3	6	1859.07	35.625	0	2.89	7.23	4.59	0	0	0	0	0	1	0
10	2	3	7	1721.66	10.75	0	-0.2	8.01	2.19	0	0	0	0	0	1	1
10	2	3	8	1748.23	27.5	0	1.39	13.74	1.15	0	0	0	0	0	1	0
10	2	3	9	1715.6	2	0	1.41	14.42	0.63	0	0	0	0	0	1	0
10	2	3	10	1688.08	36.375	0	4.17	16.14	2.55	0	0	0	0	0	1	0
10	2	3	11	1688.08	92.375	1.16	10.45	22.05	2.54	0	0	0	0	0	1	0
10	2	3	12	1741.73	100	7.15	10.91	18.38	3.78	0	0	0	0	0	1	0
10	2	3	13	1756.72	89.75	12.51	11.3	15.87	2.24	1	0	0	0	0	1	0
10	2	3	14	1821.73	69.125	0.19	8.23	20.53	2.04	0	0	0	0	0	1	0
10	2	3	15	1899.15	79.75	1.8	9.04	13.96	3.51	0	0	0	0	0	1	0
10	2	3	16	1912.7	80.625	1.94	6.84	9.24	5.5	0	0	0	0	0	1	0
10	2	3	17	1986.18	8.25	0	1.54	11.16	1.06	0	0	0	0	0	1	0
10	2	3	18	2198.61	44.125	0	4.47	16.04	1.83	0	0	0	0	0	1	0
10	2	3	19	2586	4.875	0	4.05	16.61	1.92	0	0	0	0	0	1	0
10	2	3	20	2837.4	1.625	0	7.85	20.43	2.32	0	0	0	0	0	1	0
10	2	3	21	2025.17	17.125	0	11.49	24.51	3.83	0	0	0	0	0	1	0
10	2	3	22	2011.63	100	0	12.76	22.29	5.1	0	0	0	0	0	1	0
10	2	3	23	2133.1	68.5	2.32	6.33	18.19	5.71	0	0	0	0	0	1	0
10	2	3	24	2063.12	19.625	0	6.81	15.05	4.66	0	0	0	0	0	1	0
10	2	3	25	1917.51	41.875	0	10.11	20.12	3.49	0	0	0	0	0	1	0
10	2	3	26	2257.7	100	2.91	13.09	22.28	0.97	0	0	0	0	0	1	0
10	2	3	27	2372.31	24.25	6.62	4.22	18.97	6.48	0	0	0	0	0	1	0
10	2	3	28	2148.43	43.625	0	4.26	8.58	5.07	0	0	0	0	0	1	0
10	2	3	29	2088.77	100	20.86	9.21	18.21	4.16	1	1	0	0	0	1	0
10	2	3	30	2098.77	56.625	44.9	9.39	13.06	5.68	1	1	0	0	0	1	0
10	2	3	31	2307.96	11.875	2.22	8.26	17.36	4.1	0	0	0	0	0	1	0
10	2	4	1	2548.03	5	0	8.26	21.22	0.74	0	0	0	0	0	1	0
10	2	4	2	3325.5	2.875	0	7.33	19.57	2.92	0	0	0	0	0	1	0
10	2	4	3	3517.09	10	0	7.96	20.08	3.42	0	0	0	0	0	1	0
10	2	4	4	2846.63	23.75	0	9.76	21.81	2.31	0	0	0	0	0	1	0
10	2	4	5	2784.26	19.25	0	12.43	22.88	1.69	0	0	0	0	0	1	0
10	2	4	6	2650.94	16.5	0	18.02	30.03	3.4	0	0	0	0	0	1	0
10	2	4	7	3078.94	14.625	0	19.05	30.79	5.99	0	0	0	0	0	1	0
10	2	4	8	2962.29	36.75	0	18.01	31.65	6.19	0	0	0	0	0	1	0
10	2	4	9	3658.49	100	13.22	13.28	28.09	1.84	1	0	0	0	0	1	0
10	2	4	10	4386.34	5.75	1.08	6.33	16.18	3.74	0	0	0	0	0	1	0
10	2	4	11	2512.88	0	0	8.14	17.29	2.94	0	0	0	0	0	1	0
10	2	4	12	2087.82	3	0	11.62	23.01	1.61	0	0	0	0	0	1	0
10	2	4	13	1926.86	29.75	0	8.5	20.96	3.34	0	0	0	0	0	1	0
10	2	4	14	1980.38	76.875	0.81	10.08	20.4	6.45	0	0	0	0	0	1	0
10	2	4	15	2078.57	4.875	0	3.68	13.5	1.08	0	0	0	0	0	1	0
10	2	4	16	2976.54	3.75	0	11.58	19.7	2.87	0	0	0	0	0	1	0
10	2	4	17	3572.54	47.125	0	17.95	30	2.08	0	0	0	0	0	1	0
10	2	4	18	2667.48	18	0	7.17	22.99	4.5	0	0	0	0	0	1	0
10	2	4	19	2485.21	52.875	0	7.31	15.97	3.19	0	0	0	0	0	1	0
10	2	4	20	2558.15	26.5	0	7.74	17.7	0.91	0	0	0	0	0	1	0
10	2	4	21	2838.79	78	0	12.1	19.7	2.55	0	0	0	0	0	1	0
10	2	4	22	2858.19	26.375	1.22	8.38	15.97	0.97	0	0	0	0	0	1	0
10	2	4	23	3048.94	5	0	11.25	22.14	0.97	0	0	0	0	0	1	0
10	2	4	24	2810.93	53.125	0	11.41	23.05	3.85	0	0	0	0	0	1	0
10	2	4	25	2428.52	85.75	5.32	14.17	18.06	4.96	0	0	0	0	0	1	0
10	2	4	26	2315.72	52.375	0	18.15	26.87	3.74	0	0	0	0	0	1	0
10	2	4	27	2395.02	76.625	12.2	12.63	26.24	3.25	1	0	0	0	0	1	0
10	2	4	28	2622.32	23.75	3.87	7.23	17.44	4.92	0	0	0	0	0	1	0
10	2	4	29	4328.22	0.625	0	6.38	17	3.02	0	0	0	0	0	1	0
10	2	4	30	10025.2	2.625	0	12.23	22.18	4.35	0	0	0	0	0	1	0
10	2	5	1	10565.9	6.375	0	17.94	27.94	4.95	0	0	0	0	0	1	0
10	2	5	2	2440.62	26	0	21.72	31.02	5.07	0	0	0	0	0	1	0
10	2	5	3	2124.9	38.75	0	22.86	32.14	6.18	0	0	0	0	0	1	0
10	2	5	4	2226.45	91.625	0	22.91	29.26	3.5	0	0	0	0	0	1	0
10	2	5	5	2062.26	0	0	15.89	26.04	0.95	0	0	0	0	0	1	0
10	2	5	6	2134.15	0.625	0	19.08	29.05	3.93	0	0	0	0	0	1	0
10	2	5	7	3012.65	10.125	0	18.04	32	2.76	0	0	0	0	0	1	0
10	2	5	8	3678.6	23.75	0	17.96	23.68	5.58	0	0	0	0	0	1	0
10	2	5	9	2680.21	18.25	0	12.8	31.82	6.54	0	0	0	0	0	1	0
10	2	5	10	1971.51	4.625	0	10.49	19.27	4.67	0	0	0	0	0	1	0
10	2	5	11	2147.8	34.875	0	7.04	17.05	3.65	0	0	0	0	0	1	0
10	2	5	12	2107.01	66	0	14.31	19.92	4.31	0	0	0	0	0	1	0
10	2	5	13	2453.15	84.625	29.44	13.2	29.67	2.81	1	1	0	0	0	1	0
10	2	5	14	4943.98	52.625	0	13.19	17.87	2.51	0	0	0	0	0	1	0
10	2	5	15	5754.94	57	0.71	18.88	30.98	2.12	0	0	0	0	0	1	0
10	2	5	16	2711.67	50.75	10.77	16.71	27.2	3.09	1	0	0	0	0	1	0
10	2	5	17	2278.53	81	1.7	15.24	22.42	5.82	0	0	0	0	0	1	0
10	2	5	18	2175.37	100	41.24	14.08	19.72	0.76	1	1	0	0	0	1	0
10	2	5	19	2105.39	62.875	6.09	13.95	17.97	1.68	0	0	0	0	0	1	0
10	2	5	20	2627.12	28	0	12.99	19.45	1.31	0	0	0	0	0	1	0
10	2	5	21	3878.9	28	0	14.39	24.44	0.51	0	0	0	0	0	1	0
10	2	5	22	3701.82	44.25	0	16.14	25.61	3.06	0	0	0	0	0	1	0
10	2	5	23	2613.75	86.75	0	18.97	24.4	2.37	0	0	0	0	0	1	0
10	2	5	24	2290.44	64.5	0	17.22	24.4	3.6	0	0	0	0	0	1	0
10	2	5	25	2478.77	69	0	17.33	22	4.44	0	0	0	0	0	1	0
10	2	5	26	2529.85	72.625	0	17.93	22.39	4.52	0	0	0	0	0	1	0
10	2	5	27	3536.02	36.375	0	16.95	25.47	0.62	0	0	0	0	0	1	0
10	2	5	28	9743.2	46.5	0.87	16.83	30.05	3.74	0	0	0	0	0	1	0
10	2	5	29	13147.5	72.375	0.23	19.97	23.67	3.19	0	0	0	0	0	1	0
10	2	5	30	12424.6	90.25	4.93	20.61	26.97	3.94	0	0	0	0	0	1	0
10	2	5	31	2777.47	54.375	8.45	21.91	29.98	3.08	0	0	0	0	0	1	0
10	3	6	1	2256.71	53.25	0	22.11	31.75	5.19	0	0	0	0	0	1	0
10	3	6	2	2329.43	75.375	0.13	21.87	29.21	2.39	0	0	0	0	0	1	0
10	3	6	3	2932.05	69.25	0	22.15	29.32	3.64	0	0	0	0	0	1	0
10	3	6	4	3728.43	83.375	0	22.32	30.02	2.58	0	0	0	0	0	1	0
10	3	6	5	4059.47	82.375	0	25.08	31.83	3.46	0	0	0	0	0	0	0
10	3	6	6	2936.38	32.375	0	25.93	33.68	4.27	0	0	0	0	0	0	0
10	3	6	7	2771.52	36.75	6.15	20.87	33.87	2.7	0	0	0	0	0	1	0
10	3	6	8	2996.55	36.875	0	18	25.57	0.97	0	0	0	0	0	1	0
10	3	6	9	3557.61	57.5	0	15.24	24.95	3.18	0	0	0	0	0	1	0
10	3	6	10	3660.9	53.25	7.07	20.71	27.17	3.32	0	0	0	0	0	1	0
10	3	6	11	6529.51	11.875	0	20.63	30.12	2.63	0	0	0	0	0	1	0
10	3	6	12	7492.4	21.5	0	19.96	25.6	3.06	0	0	0	0	0	1	0
10	3	6	13	3924.12	93.875	17.25	23.01	30.98	3.07	1	0	0	0	0	0	0
10	3	6	14	4454.64	65.25	3.39	23.93	32.81	1.15	0	0	0	0	0	0	0
10	3	6	15	4701.35	81.625	1.66	22.97	29.8	1.73	0	0	0	0	0	1	0
10	3	6	16	4593.71	92.25	0	21.79	27.32	3.36	0	0	0	0	0	1	0
10	3	6	17	4942.08	28.25	23.09	22.18	29.9	2.45	1	1	0	0	0	1	0
10	3	6	18	8245.15	7.5	0	22.04	31.49	3.36	0	0	0	0	0	1	0
10	3	6	19	10038.5	11.375	0	19.16	26.28	2.86	0	0	0	0	0	1	0
10	3	6	20	5674.79	57.125	0	23.84	30.89	2.88	0	0	0	0	0	0	0
10	3	6	21	5080.44	41.375	10.22	23.05	32.24	0.81	1	0	0	0	0	0	0
10	3	6	22	4966.71	18.875	0	24.1	31.12	1.71	0	0	0	0	0	0	0
10	3	6	23	5684.54	44.625	0.34	25.73	31.88	0.97	0	0	0	0	0	0	0
10	3	6	24	6451.31	24.625	1.34	24.23	32.87	2.16	0	0	0	0	0	0	0
10	3	6	25	10181.3	57.5	8.88	24.01	36.18	1.2	0	0	0	0	1	0	0
10	3	6	26	10474.5	63.875	0	23.95	30.02	2.5	0	0	0	0	0	0	0
10	3	6	27	7301.11	23.375	0	25.67	32.34	2.63	0	0	0	0	0	0	0
10	3	6	28	6812.77	14.125	0	24.3	36.02	5.21	0	0	0	0	1	0	0
10	3	6	29	7152.63	35.5	0	27.05	35.04	2.84	0	0	0	0	1	0	0
10	3	6	30	7013.68	100	22.45	23.02	33.16	1.47	1	1	0	0	0	0	0
10	3	7	1	8789.16	37.25	0	18.98	24.26	4.44	0	0	0	0	0	1	0
10	3	7	2	17113.8	0.125	0	16.57	25.93	4.71	0	0	0	0	0	1	0
10	3	7	3	21147.7	4.375	0	14.48	25.91	1.58	0	0	0	0	0	1	0
10	3	7	4	21478.6	0	0	16.89	26.98	2.98	0	0	0	0	0	1	0
10	3	7	5	13061.9	8.25	0	19.51	31.01	3.73	0	0	0	0	0	1	0
10	3	7	6	11818.5	11.875	0	21.91	34.11	1.87	0	0	0	0	1	1	0
10	3	7	7	11704.6	13	0	24.12	34.92	1.35	0	0	0	0	1	0	0
10	3	7	8	11672.6	46.75	0	25.03	36.64	3.26	0	0	0	0	1	0	0
10	3	7	9	13383.7	33.25	0.1	24.91	29	2.84	0	0	0	0	0	0	0
10	3	7	10	13370.3	86	0	23.92	29.23	1.15	0	0	0	0	0	0	0
10	3	7	11	11416.2	21	8.59	22.91	29.91	3.09	0	0	0	0	0	1	0
10	3	7	12	11975.6	67.125	0	23.93	31.72	3.46	0	0	0	0	0	0	0
10	3	7	13	11840.7	100	0.86	25.29	30.92	4	0	0	0	0	0	0	0
10	3	7	14	11548.9	100	0	25.99	32.75	4.26	0	0	0	0	0	0	0
10	3	7	15	13103.3	40.25	4.39	23.97	30.19	0.67	0	0	0	0	0	0	0
10	3	7	16	17067.2	70.625	0.12	24.24	32.84	3.73	0	0	0	0	0	0	0
10	3	7	17	16618.2	94.625	0	26.97	34	3.97	0	0	0	0	1	0	0
10	3	7	18	15504.9	37.75	1.24	23.09	32.84	3.81	0	0	0	0	0	0	0
10	3	7	19	16968.7	92	0	25.57	34.92	5.87	0	0	0	0	1	0	0
10	3	7	20	18043.7	55	40.7	24.17	34.06	3.15	1	1	0	0	1	0	0
10	3	7	21	17912.6	83.25	12.12	24.13	34.51	4.2	1	0	0	0	1	0	0
10	3	7	22	18141.7	26.5	1.09	25.11	33.83	1.91	0	0	0	0	0	0	0
10	3	7	23	18484.3	28.25	0	25.96	32.38	3.14	0	0	0	0	0	0	0
10	3	7	24	18424.5	14.875	0	26.75	35.11	4.32	0	0	0	0	1	0	0
10	3	7	25	15732.5	15.875	0	28.11	37.23	4.38	0	0	0	0	1	0	0
10	3	7	26	16649.1	35.75	2.25	24.26	37.92	3.19	0	0	0	0	1	0	0
10	3	7	27	16530	40.625	0	19.23	29.34	1.74	0	0	0	0	0	1	0
10	3	7	28	15725.6	49.125	0	22.26	28.31	3.83	0	0	0	0	0	1	0
10	3	7	29	15699	83.125	0	24.23	32.2	5.1	0	0	0	0	0	0	0
10	3	7	30	16178.8	44.5	52.76	22.58	34.35	2.6	1	1	1	0	1	1	0
10	3	7	31	16274.3	53.875	0	18.58	27.13	2.44	0	0	0	0	0	1	0
10	3	8	1	13202.5	100	4.86	20.84	28.13	2.08	0	0	0	0	0	1	0
10	3	8	2	14274.4	100	2.8	20.73	23.32	3.97	0	0	0	0	0	1	0
10	3	8	3	14510	76.75	0.71	21.1	26.93	3	0	0	0	0	0	1	0
10	3	8	4	14877	72.125	0	24.89	29.08	3.52	0	0	0	0	0	0	0
10	3	8	5	14470.7	75.75	2.06	24	32.87	4.49	0	0	0	0	0	0	0
10	3	8	6	16083.6	66.375	18.65	22.93	34.82	3.4	1	0	0	0	1	1	0
10	3	8	7	16968.3	85.75	0	22.36	32.14	2.51	0	0	0	0	0	1	0
10	3	8	8	14182.6	58.125	0	23.05	29.27	2.85	0	0	0	0	0	0	0
10	3	8	9	14921.8	13.625	0	22.4	29.11	1.91	0	0	0	0	0	1	0
10	3	8	10	14057	60.625	0	23.26	29.38	2.68	0	0	0	0	0	0	0
10	3	8	11	12671.2	69.875	0	26.21	34.32	1.31	0	0	0	0	1	0	0
10	3	8	12	13103.9	100	3.92	25.25	34.97	1.45	0	0	0	0	1	0	0
10	3	8	13	13911.7	77.75	16.18	23.25	30.97	5.05	1	0	0	0	0	0	0
10	3	8	14	13880.2	46.75	0.48	21.34	28.94	4.93	0	0	0	0	0	1	0
10	3	8	15	9806.9	65.25	0	20.77	27.36	3.2	0	0	0	0	0	1	0
10	3	8	16	8190	70.25	0	24.94	29.36	4.11	0	0	0	0	0	0	0
10	3	8	17	8122.12	87.875	0	25.07	32.26	3.51	0	0	0	0	0	0	0
10	3	8	18	7446.32	100	0.03	25.76	33.22	3.07	0	0	0	0	0	0	0
10	3	8	19	8211.77	95.875	34.13	23.99	31.12	1.2	1	1	0	0	0	0	0
10	3	8	20	9550.53	47.5	7.03	21.31	26.83	1.69	0	0	0	0	0	1	0
10	3	8	21	10706.1	10.75	0	21.16	30.19	1.82	0	0	0	0	0	1	0
10	3	8	22	5798.77	100	15.68	24.81	29.66	2.58	1	0	0	0	0	0	0
10	3	8	23	4902.96	69.375	5.77	23.35	31.89	0.99	0	0	0	0	0	0	0
10	3	8	24	4377.12	41.625	0	22.95	29.37	4.72	0	0	0	0	0	1	0
10	3	8	25	4442.99	75.125	0	21.55	25.89	3.37	0	0	0	0	0	1	0
10	3	8	26	4741.85	48.5	0	20.12	26.1	1.5	0	0	0	0	0	1	0
10	3	8	27	6280.85	49.125	0	20.99	29.27	2.78	0	0	0	0	0	1	0
10	3	8	28	6382.99	55.875	0	21.14	27.35	2.09	0	0	0	0	0	1	0
10	3	8	29	3685.07	6.25	0	18.14	28.1	1.56	0	0	0	0	0	1	0
10	3	8	30	3260.28	1	0	20.13	29.49	0.43	0	0	0	0	0	1	0
10	3	8	31	3180.83	0.125	0	21.4	34	1.08	0	0	0	0	1	1	0
10	4	9	1	3108.85	0	0	20.51	33.1	1.5	0	0	0	0	0	1	0
10	4	9	2	3174.9	41.875	0	20.23	32.97	2.25	0	0	0	0	0	1	0
10	4	9	3	9519.99	74.25	4.56	24.88	28.44	7.35	0	0	0	0	0	0	0
10	4	9	4	13266	5	23.89	20.95	27.85	4.24	1	1	0	0	0	1	0
10	4	9	5	12851.2	8.75	0	16.92	28.98	1.85	0	0	0	0	0	1	0
10	4	9	6	4003.38	0.125	0	17.51	25.37	3.2	0	0	0	0	0	1	0
10	4	9	7	2734.65	1.625	0	17.49	27.42	3.05	0	0	0	0	0	1	0
10	4	9	8	2423.74	34.875	0	22.06	30.22	5.33	0	0	0	0	0	1	0
10	4	9	9	2690.99	11.75	0	20.16	31.89	3.42	0	0	0	0	0	1	0
10	4	9	10	3963.08	4.75	0	16.89	27.04	4.09	0	0	0	0	0	1	0
10	4	9	11	4453.31	3.375	0	15.63	24.56	3.11	0	0	0	0	0	1	0
10	4	9	12	2654.76	100	3.23	17.11	24.98	3.36	0	0	0	0	0	1	0
10	4	9	13	2448.89	37.375	5.91	18.06	20.99	4.83	0	0	0	0	0	1	0
10	4	9	14	2270.29	3.875	0	17.35	26.78	2.61	0	0	0	0	0	1	0
10	4	9	15	2388.29	8.625	0	16.19	31.87	2.27	0	0	0	0	0	1	0
10	4	9	16	2668.12	11.375	0	19.9	27.34	4.71	0	0	0	0	0	1	0
10	4	9	17	4999.39	25	0	22.92	31.21	3.46	0	0	0	0	0	1	0
10	4	9	18	5826.45	32.125	0	19.99	29.9	5.95	0	0	0	0	0	1	0
10	4	9	19	2391.83	0.25	0	15.75	24.58	3.9	0	0	0	0	0	1	0
10	4	9	20	2025.93	0	0	17.32	24.85	3.66	0	0	0	0	0	1	0
10	4	9	21	2154.19	0	0	15.06	25.26	2.67	0	0	0	0	0	1	0
10	4	9	22	2357.41	41.375	0	17.82	25.34	4.32	0	0	0	0	0	1	0
10	4	9	23	2730.37	10.875	0	21.8	31.83	2.21	0	0	0	0	0	1	0
10	4	9	24	5470.35	49.375	0	22.97	31.19	3.76	0	0	0	0	0	1	0
10	4	9	25	5840.04	11.375	0	20.84	33.21	5.79	0	0	0	0	0	1	0
10	4	9	26	2647.82	85.5	0	22.94	32.87	1.26	0	0	0	0	0	1	0
10	4	9	27	1968.98	100	2.78	22.83	25.93	4.52	0	0	0	0	0	1	0
10	4	9	28	1933.9	98.5	46.67	19.94	24.44	4.32	1	1	0	0	0	1	0
10	4	9	29	1828.06	99.75	3.03	20.67	26.84	2.14	0	0	0	0	0	1	0
10	4	9	30	1892.33	100	21.41	21.86	25.78	8.21	1	1	0	0	0	1	0
10	4	10	1	2191	100	93.58	18.23	26.59	3.49	1	1	1	0	0	1	0
10	4	10	2	3162.73	24.625	0.71	16.61	21.04	4.85	0	0	0	0	0	1	0
10	4	10	3	2297.03	70.5	3.12	16.37	19.67	5.72	0	0	0	0	0	1	0
10	4	10	4	1961.88	100	29.63	15.51	17.96	5.92	1	1	0	0	0	1	0
10	4	10	5	2032.75	7	1.11	9.18	15.92	6.44	0	0	0	0	0	1	0
10	4	10	6	1853.14	46	0	8.43	18.84	4.11	0	0	0	0	0	1	0
10	4	10	7	2060.1	11.625	0	10.27	17.08	4.73	0	0	0	0	0	1	0
10	4	10	8	3399.98	0.125	0	13.98	25.69	2.84	0	0	0	0	0	1	0
10	4	10	9	4026.34	0	0	11.96	23.28	2.58	0	0	0	0	0	1	0
10	4	10	10	2749.73	0	0	13.19	27.1	1.37	0	0	0	0	0	1	0
10	4	10	11	2205.6	3.125	0	16.79	28.25	3.21	0	0	0	0	0	1	0
10	4	10	12	2179.48	8.5	0	16.97	29.95	2.65	0	0	0	0	0	1	0
10	4	10	13	2020.71	71.5	0	18.14	29.06	2.54	0	0	0	0	0	1	0
10	4	10	14	2023.72	65.75	0	15.71	20.97	1.73	0	0	0	0	0	1	0
10	4	10	15	2237.91	48.125	18.35	9.48	19.36	6.18	1	0	0	0	0	1	0
10	4	10	16	3661.98	4	0.34	9.56	19.71	7.59	0	0	0	0	0	1	0
10	4	10	17	1975.35	0	0	7.59	18.81	3.45	0	0	0	0	0	1	0
10	4	10	18	1969.33	12.875	0	10.35	22.85	1.1	0	0	0	0	0	1	0
10	4	10	19	1881.86	39.875	0	13.09	21.85	1.66	0	0	0	0	0	1	0
10	4	10	20	1839.49	56.25	0	15.57	21.2	4.44	0	0	0	0	0	1	0
10	4	10	21	1691.82	21	0	13.06	18.99	3.76	0	0	0	0	0	1	0
10	4	10	22	2077.5	1.5	0	9.2	23.77	3.49	0	0	0	0	0	1	0
10	4	10	23	2351.16	2	0	6.41	17.05	1.95	0	0	0	0	0	1	0
10	4	10	24	1825.05	21.625	0	10.75	21.06	4.07	0	0	0	0	0	1	0
10	4	10	25	1938.97	49.5	0	15.08	24.33	4.45	0	0	0	0	0	1	0
10	4	10	26	1732.94	60.5	6.91	18.91	24.95	4.29	0	0	0	0	0	1	0
10	4	10	27	1735.55	63	0.53	20.62	26.99	6.47	0	0	0	0	0	1	0
10	4	10	28	1707.56	100	41.51	21.99	29.47	4.77	1	1	0	0	0	1	0
10	4	10	29	1999.5	22.5	9.9	11.21	26.84	5.91	0	0	0	0	0	1	0
10	4	10	30	1885.31	9	0	6.74	15.98	3.21	0	0	0	0	0	1	0
10	4	10	31	1732.12	9.75	0	9.11	15.82	4.9	0	0	0	0	0	1	0
10	4	11	1	1838.91	12.375	0	10.93	21.18	5.83	0	0	0	0	0	1	0
10	4	11	2	1774.13	56	0	7.88	14.37	5.34	0	0	0	0	0	1	0
10	4	11	3	1715.65	96.75	0	9.27	12.98	5.16	0	0	0	0	0	1	0
10	4	11	4	1649.84	91.625	0.9	11.9	15.87	0.2	0	0	0	0	0	1	0
10	4	11	5	2015.48	66.375	11.65	8.84	16.82	5.1	1	0	0	0	0	1	0
10	4	11	6	1861.98	76	0	5.61	14.86	3.92	0	0	0	0	0	1	0
10	4	11	7	1780.36	26	0	6.63	12.83	7.33	0	0	0	0	0	1	0
10	4	11	8	1709.5	1.5	0	2.91	11.1	6.2	0	0	0	0	0	1	0
10	4	11	9	1609.04	0	0	5.46	16.07	5.18	0	0	0	0	0	1	0
10	4	11	10	1701.58	27	0	6.19	14.53	4.71	0	0	0	0	0	1	0
10	4	11	11	1938.47	28.75	0	7.46	13.97	5.28	0	0	0	0	0	1	0
10	4	11	12	2210.97	9.625	0	7.47	13.23	6.25	0	0	0	0	0	1	0
10	4	11	13	2440.16	1.75	0	7.77	13.28	5.07	0	0	0	0	0	1	0
10	4	11	14	1920	8.75	0	3.69	15.83	1.99	0	0	0	0	0	1	0
10	4	11	15	1816.2	11.875	0	4.88	16.32	1.93	0	0	0	0	0	1	0
10	4	11	16	1760.72	85.375	0	7.82	19.74	3.32	0	0	0	0	0	1	0
10	4	11	17	1718.73	45.375	1.65	14.66	20.86	4.19	0	0	0	0	0	1	0
10	4	11	18	1766.71	26.875	0	5.52	18.82	2.22	0	0	0	0	0	1	0
10	4	11	19	2156.36	7.875	0	5.69	14.8	3.9	0	0	0	0	0	1	0
10	4	11	20	2304.24	3.875	0	3.58	12.19	3.44	0	0	0	0	0	1	0
10	4	11	21	1716.15	9.75	0	5.35	18.25	1.1	0	0	0	0	0	1	0
10	4	11	22	1768.67	51	0	6.19	17.54	1.02	0	0	0	0	0	1	0
10	4	11	23	1894.14	32.75	0	7.26	20.58	4.48	0	0	0	0	0	1	0
10	4	11	24	1997.9	13.125	0	10.81	23.8	4.39	0	0	0	0	0	1	0
10	4	11	25	2228.68	64.625	0	5.79	11.93	1.89	0	0	0	0	0	1	0
10	4	11	26	2476.05	71.625	0	7.48	18.08	4.3	0	0	0	0	0	1	0
10	4	11	27	2455.77	26.375	1.74	4.95	19.33	4.42	0	0	0	0	0	1	0
10	4	11	28	1843.28	57.5	0	2.24	9.51	3.86	0	0	0	0	0	1	0
10	4	11	29	1667.64	32.375	0	1.06	9.25	3.45	0	0	0	0	0	1	0
10	4	11	30	1657.57	68.625	0	4.76	13.82	4.15	0	0	0	0	0	1	0
10	1	12	1	1531.92	100	4.18	14.72	19.38	5.17	0	0	0	0	0	1	0
10	1	12	2	1531.92	25.625	6.26	0.43	20.76	4.79	0	0	0	0	0	1	0
10	1	12	3	1571.08	81	0	1.31	7.34	3.84	0	0	0	0	0	1	0
10	1	12	4	1658.07	61.75	0	-0.52	7.06	5.24	0	0	0	0	0	1	1
10	1	12	5	1560.2	66.625	1.65	0.56	6.02	5.98	0	0	0	0	0	1	0
10	1	12	6	1560.2	35.125	0	-2.81	4.01	7.16	0	0	0	0	0	1	1
10	1	12	7	1556.44	13.875	0	-3.17	4.1	7.03	0	0	0	0	0	1	1
10	1	12	8	1510.82	12.375	0	-3.75	2.91	5.74	0	0	0	0	0	1	1
10	1	12	9	1530.6	34.625	0	-3.11	2.27	4.23	0	0	0	0	0	1	1
10	1	12	10	1541.6	54.75	0	-5.06	3.33	1.5	0	0	0	0	0	1	1
10	1	12	11	1720.45	56.125	0	-2.02	8.89	2.78	0	0	0	0	0	1	1
10	1	12	12	1479.8	100	12.53	4.67	13.53	3.39	1	0	0	0	0	1	0
10	1	12	13	1479.8	97.875	6.73	2.79	12.17	5.33	0	0	0	0	0	1	0
10	1	12	14	1479.8	44.5	1.68	-5.8	1.36	8.44	0	0	0	0	0	1	1
10	1	12	15	1479.8	3.5	0	-7.05	-1.89	6.86	0	0	0	0	0	1	1
10	1	12	16	1506.79	62.5	0	-7.71	1.02	2.51	0	0	0	0	0	1	1
10	1	12	17	1479.8	65.875	14.53	-3.12	1.12	3.28	1	0	0	0	0	1	1
10	1	12	18	1542.78	64.5	0	-4.02	2.43	2.16	0	0	0	0	0	1	1
10	1	12	19	1588.09	97.375	2.66	-0.63	4.92	5.93	0	0	0	0	0	1	1
10	1	12	20	1558.1	10.375	0	-2.09	3.99	7.67	0	0	0	0	0	1	1
10	1	12	21	1526.61	20.625	0	-1.18	4.87	6.86	0	0	0	0	0	1	1
10	1	12	22	1591.09	48.5	0	-1.48	7.1	3	0	0	0	0	0	1	1
10	1	12	23	1618.08	34.5	0	0.1	7.94	7.82	0	0	0	0	0	1	0
10	1	12	24	1716.15	27.125	0	-0.06	7.25	7	0	0	0	0	0	1	1
10	1	12	25	1716.15	71.25	0	-3.65	6.52	1.99	0	0	0	0	0	1	1
10	1	12	26	1608.49	99.75	9.83	-0.79	4.16	6.1	0	0	0	0	0	1	1
10	1	12	27	1543.71	57.25	15.81	-3.03	0.43	8.94	1	0	0	0	0	1	1
10	1	12	28	1543.71	12.75	0	-1.4	4.47	6.05	0	0	0	0	0	1	1
10	1	12	29	1759.67	11.25	0	-5.29	4.1	2.48	0	0	0	0	0	1	1
10	1	12	30	1810.65	28.5	0	-6.08	4.88	1.05	0	0	0	0	0	1	1
10	1	12	31	1580.94	16.875	0	-4.63	7.89	2.24	0	0	0	0	0	1	1
11	1	1	1	1614.56	31.25	0	-2.41	11.07	3.11	0	0	0	0	0	1	1
11	1	1	2	1590.57	86.25	0.17	3.26	16.98	3.19	0	0	0	0	0	1	0
11	1	1	3	1620.56	17.375	7.4	0.11	18.43	6.12	0	0	0	0	0	1	0
11	1	1	4	1527.59	25	0	-3.71	3.45	3.78	0	0	0	0	0	1	1
11	1	1	5	1552.58	29.125	0	-1.87	8.05	1.86	0	0	0	0	0	1	1
11	1	1	6	1527.59	63.5	0	-0.71	6.15	1.73	0	0	0	0	0	1	1
11	1	1	7	1568.09	49.625	0	-2.97	6.8	2.14	0	0	0	0	0	1	1
11	1	1	8	1589.88	75	0.34	-1.05	6.65	2.06	0	0	0	0	0	1	1
11	1	1	9	1552.75	8.25	0.61	-4.6	4.44	8.08	0	0	0	0	0	1	1
11	1	1	10	1512.26	47.75	0	-4.82	3.29	4.96	0	0	0	0	0	1	1
11	1	1	11	1541.7	93.875	0.88	-1.3	3.09	3.3	0	0	0	0	0	1	1
11	1	1	12	1571.69	37.5	5.47	-0.66	3.17	5.3	0	0	0	0	0	1	1
11	1	1	13	1567.79	61.25	0	-2.98	4.35	6.76	0	0	0	0	0	1	1
11	1	1	14	1929.93	16.625	0	-4.45	3.75	3.35	0	0	0	0	0	1	1
11	1	1	15	1899.29	29.75	0	-4.23	4.42	2.76	0	0	0	0	0	1	1
11	1	1	16	1639.27	28.75	0	-1.56	9.85	1.62	0	0	0	0	0	1	1
11	1	1	17	1511.79	62.5	0	0.28	8.98	5.01	0	0	0	0	0	1	0
11	1	1	18	1511.79	81.125	44.25	3.09	10.12	2.31	1	1	0	0	0	1	0
11	1	1	19	1496.47	47.625	0.46	3.7	6.75	2.04	0	0	0	0	0	1	0
11	1	1	20	1548.66	89.125	0	2.24	13.1	1.81	0	0	0	0	0	1	0
11	1	1	21	1563.66	62.25	0	1.56	10.54	2.66	0	0	0	0	0	1	0
11	1	1	22	1592.45	60.375	0	-5.03	6.72	5.58	0	0	0	0	0	1	1
11	1	1	23	1493.17	14.5	0	-7.22	-0.29	4.69	0	0	0	0	0	1	1
11	1	1	24	1515.66	41.125	0	-6.19	4.14	2.81	0	0	0	0	0	1	1
11	1	1	25	1512.45	63.75	0	-2.79	2.97	0.92	0	0	0	0	0	1	1
11	1	1	26	1512.45	100	19.69	1.62	10.08	3.62	1	0	0	0	0	1	0
11	1	1	27	1489.96	62.375	5.36	0.59	7.28	4.98	0	0	0	0	0	1	0
11	1	1	28	1556.99	49.625	0	-2.48	6.04	1.87	0	0	0	0	0	1	1
11	1	1	29	1667.31	19.875	0	-2.48	10.36	1.71	0	0	0	0	0	1	1
11	1	1	30	1594.53	29.125	0	-1.22	10.65	0.26	0	0	0	0	0	1	1
11	1	1	31	1594.52	32.125	0	1.71	7.36	5.57	0	0	0	0	0	1	0
11	1	2	1	1640.44	89.25	0.59	1.19	4.59	2.93	0	0	0	0	0	1	0
11	1	2	2	1622.45	72.625	1.95	3.06	17.87	4.39	0	0	0	0	0	1	0
11	1	2	3	1594.46	75.875	0.68	1.23	21.51	5.29	0	0	0	0	0	1	0
11	1	2	4	1707.59	99.875	0	1.06	5.25	1.13	0	0	0	0	0	1	0
11	1	2	5	1691.04	94	0.92	1.95	6.61	1.39	0	0	0	0	0	1	0
11	1	2	6	1726.61	33.625	24.58	3.41	14.9	3.22	1	1	0	0	0	1	0
11	1	2	7	1710.22	51.5	0	-0.02	8.75	1.77	0	0	0	0	0	1	1
11	1	2	8	1751.7	54	7.62	1.56	12	2.98	0	0	0	0	0	1	0
11	1	2	9	1660.13	19.875	0	-2.71	11.03	3.36	0	0	0	0	0	1	1
11	1	2	10	1658.33	67.625	6.15	-1.99	2.15	3.51	0	0	0	0	0	1	1
11	1	2	11	1935.63	15.25	0	-6.83	1.69	0.04	0	0	0	0	0	1	1
11	1	2	12	1870.06	15.625	0	-5.14	5.58	3.05	0	0	0	0	0	1	1
11	1	2	13	1693.35	13.875	0	-1.42	11.59	2.59	0	0	0	0	0	1	1
11	1	2	14	1632.03	5.25	0	2.51	12.87	6.49	0	0	0	0	0	1	0
11	1	2	15	1677.22	12	0	4.17	19.94	5.8	0	0	0	0	0	1	0
11	1	2	16	1675.42	32	0	-0.61	8.1	1.14	0	0	0	0	0	1	1
11	1	2	17	1652.48	16.75	0	1.1	14.15	3.54	0	0	0	0	0	1	0
11	1	2	18	1984.5	42.125	0	7.78	20.75	5.56	0	0	0	0	0	1	0
11	1	2	19	2202.26	2.625	0	11.59	23.38	6.83	0	0	0	0	0	1	0
11	1	2	20	1785.98	5.5	0	3.21	18.83	5.85	0	0	0	0	0	1	0
11	1	2	21	1690.96	79	0	3.88	11.83	4.09	0	0	0	0	0	1	0
11	1	2	22	1650.98	82.75	0.42	1.75	22.02	6.81	0	0	0	0	0	1	0
11	1	2	23	1654.81	23	0	-1.81	3.06	3.93	0	0	0	0	0	1	1
11	1	2	24	1715.59	20.625	0	-1.51	7.13	1.93	0	0	0	0	0	1	1
11	1	2	25	1865.77	100	1.12	3.23	15.89	5.86	0	0	0	0	0	1	0
11	1	2	26	1963.26	24.5	0.9	2.07	22.48	2.62	0	0	0	0	0	1	0
11	1	2	27	1866.15	48.75	0	3.7	9.63	2.1	0	0	0	0	0	1	0
11	1	2	28	1753.27	77.125	1.03	10.27	19.19	4.79	0	0	0	0	0	1	0
11	2	3	1	1636.51	59.625	16.62	4.94	24.63	5.25	1	0	0	0	0	1	0
11	2	3	2	1716.48	12.875	0	-1.31	7.1	1.84	0	0	0	0	0	1	1
11	2	3	3	1804.25	7.75	0	1.58	16.65	5.44	0	0	0	0	0	1	0
11	2	3	4	1978.12	32.625	0	0.09	4.91	4.87	0	0	0	0	0	1	0
11	2	3	5	1983.02	18.875	0	3.87	9.59	4.17	0	0	0	0	0	1	0
11	2	3	6	1790.39	100	0.87	10.47	17.58	6.08	0	0	0	0	0	1	0
11	2	3	7	1735.37	52.875	9.88	4.36	17.15	4.79	0	0	0	0	0	1	0
11	2	3	8	1788.77	18.75	0	2.97	10.08	4.62	0	0	0	0	0	1	0
11	2	3	9	1697.8	70	0	3.96	10.39	5.38	0	0	0	0	0	1	0
11	2	3	10	1738.79	100	0	7.62	12.2	6.55	0	0	0	0	0	1	0
11	2	3	11	1811.78	67.5	15.88	7.11	15.73	2.87	1	0	0	0	0	1	0
11	2	3	12	2308.48	15.75	0	2.17	10.96	4.58	0	0	0	0	0	1	0
11	2	3	13	1928.94	32.625	0	6.42	17.71	3.62	0	0	0	0	0	1	0
11	2	3	14	1906.94	16.125	0	5.74	21.62	4.97	0	0	0	0	0	1	0
11	2	3	15	1949.23	77	0	5.58	10.54	4.53	0	0	0	0	0	1	0
11	2	3	16	2082.69	100	1.05	7.55	14	1.34	0	0	0	0	0	1	0
11	2	3	17	2134.97	32.875	3.99	7.91	16.42	1.9	0	0	0	0	0	1	0
11	2	3	18	2752.73	9.75	0	9	16.22	3.37	0	0	0	0	0	1	0
11	2	3	19	2851.67	22	0	13.96	27.36	2.72	0	0	0	0	0	1	0
11	2	3	20	1918.13	17.75	0	4.9	17.5	3.62	0	0	0	0	0	1	0
11	2	3	21	1801.27	80.125	0.43	6.95	10.2	3.53	0	0	0	0	0	1	0
11	2	3	22	1696.9	66.125	5.16	11.87	22.82	0.59	0	0	0	0	0	1	0
11	2	3	23	1659.41	90.375	0	9.45	17.03	4.37	0	0	0	0	0	1	0
11	2	3	24	1632.42	94.25	6.93	9.25	17.73	2.06	0	0	0	0	0	1	0
11	2	3	25	2190.78	65.625	0.65	3.73	10.14	3.51	0	0	0	0	0	1	0
11	2	3	26	2503.96	95	0	4.02	9.31	2.63	0	0	0	0	0	1	0
11	2	3	27	1773.31	96.875	4.4	2.26	6.75	6.12	0	0	0	0	0	1	0
11	2	3	28	1736.42	47.375	1.88	0.15	5.1	3.09	0	0	0	0	0	1	0
11	2	3	29	1955.66	7.125	0.13	-1.29	8.65	2.38	0	0	0	0	0	1	1
11	2	3	30	1873.6	74.375	0	3.2	11	3.83	0	0	0	0	0	1	0
11	2	3	31	1745.7	95	16.6	6.15	8.33	5.09	1	0	0	0	0	1	0
11	2	4	1	1861.66	98.875	5.12	6.19	8.99	3.66	0	0	0	0	0	1	0
11	2	4	2	2030.28	69	0	3.76	10.47	3.95	0	0	0	0	0	1	0
11	2	4	3	1972.58	23.5	1.7	4.08	15.28	3.65	0	0	0	0	0	1	0
11	2	4	4	1899.91	25.875	0	8.97	16.49	6.09	0	0	0	0	0	1	0
11	2	4	5	1960.61	65.25	12.54	16.49	27.23	5.43	1	0	0	0	0	1	0
11	2	4	6	2019.28	28.625	2.49	4.39	20.59	1.91	0	0	0	0	0	1	0
11	2	4	7	2174.53	11.125	0	8.7	16.76	3.47	0	0	0	0	0	1	0
11	2	4	8	2594.57	66.25	0	9.62	24.09	4.42	0	0	0	0	0	1	0
11	2	4	9	2776.06	76	5.48	8.73	16.99	4.65	0	0	0	0	0	1	0
11	2	4	10	2123.13	46.625	1.52	8.15	11.2	1.98	0	0	0	0	0	1	0
11	2	4	11	1924.13	18.25	0	11.54	18.25	5	0	0	0	0	0	1	0
11	2	4	12	2123.53	59.125	0	18.49	26.89	5.89	0	0	0	0	0	1	0
11	2	4	13	2079.56	54.625	0.47	13.88	27.81	2.36	0	0	0	0	0	1	0
11	2	4	14	1942.09	8.5	0	9.44	20.57	2.64	0	0	0	0	0	1	0
11	2	4	15	2947.28	10.75	0	7.22	18.38	2.55	0	0	0	0	0	1	0
11	2	4	16	3245.93	48.875	0	12.73	17.02	6.48	0	0	0	0	0	1	0
11	2	4	17	3238.55	20.375	8.66	11.37	20.82	4.32	0	0	0	0	0	1	0
11	2	4	18	3543.33	15.125	0	13.41	20.62	3.7	0	0	0	0	0	1	0
11	2	4	19	3939.1	28.75	0	15.94	25.6	5.65	0	0	0	0	0	1	0
11	2	4	20	3309.2	13.625	0	18.46	26.46	5.86	0	0	0	0	0	1	0
11	2	4	21	3933.76	29	0	17.02	29.61	1.59	0	0	0	0	0	1	0
11	2	4	22	4273.73	30.625	0	8.23	18.59	4.62	0	0	0	0	0	1	0
11	2	4	23	3884	59.75	0	11.57	17.56	3.36	0	0	0	0	0	1	0
11	2	4	24	3022.36	4.875	0	17.64	27.08	4.39	0	0	0	0	0	1	0
11	2	4	25	2594.8	14	0	20.54	30.54	4.51	0	0	0	0	0	1	0
11	2	4	26	2436.7	30.75	0	21.88	29.13	4.42	0	0	0	0	0	1	0
11	2	4	27	2758.96	44.5	0.44	19.71	26.71	4.81	0	0	0	0	0	1	0
11	2	4	28	2777.43	49.5	0	22.53	28.06	7.69	0	0	0	0	0	1	0
11	2	4	29	3580.41	42.5	12.11	15.79	28.2	3.58	1	0	0	0	0	1	0
11	2	4	30	3564.64	9.875	0	12.34	23.6	3.44	0	0	0	0	0	1	0
11	2	5	1	2354.51	33.75	0	8.15	18.82	2.25	0	0	0	0	0	1	0
11	2	5	2	2160.57	41.375	0	10.9	18.91	2.99	0	0	0	0	0	1	0
11	2	5	3	2153.68	13	0	16.75	25.59	4.41	0	0	0	0	0	1	0
11	2	5	4	2039.43	75.125	0	18.58	27.88	1.22	0	0	0	0	0	1	0
11	2	5	5	4690.62	0	3.14	9.79	19.43	5.68	0	0	0	0	0	1	0
11	2	5	6	10569.3	15.625	0	9.76	18.96	4.35	0	0	0	0	0	1	0
11	2	5	7	10794.3	18.5	0	11.07	21.81	1.63	0	0	0	0	0	1	0
11	2	5	8	1964.75	91.625	0.01	14.29	22.11	0.77	0	0	0	0	0	1	0
11	2	5	9	2159.8	4.875	0.97	11.85	20.46	1.95	0	0	0	0	0	1	0
11	2	5	10	2096.01	8.875	0	10.61	24.44	2.15	0	0	0	0	0	1	0
11	2	5	11	2110.2	2.625	0	9.98	21.96	2.5	0	0	0	0	0	1	0
11	2	5	12	2574.44	13	0	10.31	18.32	2.73	0	0	0	0	0	1	0
11	2	5	13	5421.47	91	0	13.07	19.54	3.63	0	0	0	0	0	1	0
11	2	5	14	5758.18	85.875	6.43	16.38	19.27	4.81	0	0	0	0	0	1	0
11	2	5	15	2436.73	93.5	0	18.35	24.08	4.47	0	0	0	0	0	1	0
11	2	5	16	2177.09	74.5	1.79	18.17	26.11	2.42	0	0	0	0	0	1	0
11	2	5	17	2207.35	99.125	0.47	18.4	24.96	4.56	0	0	0	0	0	1	0
11	2	5	18	2078.96	38.75	0.69	14.93	23.23	2.94	0	0	0	0	0	1	0
11	2	5	19	2647.3	45.125	2.58	15.2	23.91	2.78	0	0	0	0	0	1	0
11	2	5	20	3579.5	65.25	0.48	15.44	24.19	1.85	0	0	0	0	0	1	0
11	2	5	21	4522.73	28.375	0	15.24	24.45	1.91	0	0	0	0	0	1	0
11	2	5	22	2641.12	16.75	0	15.89	25.23	1.44	0	0	0	0	0	1	0
11	2	5	23	2132.85	46	0	20.62	27.7	4.61	0	0	0	0	0	1	0
11	2	5	24	1986.97	49.875	0.76	22	29.4	3.84	0	0	0	0	0	1	0
11	2	5	25	1885.54	44	8.86	18.77	32.61	0.84	0	0	0	0	0	1	0
11	2	5	26	3184.25	27.875	0	22.51	28.22	3.44	0	0	0	0	0	1	0
11	2	5	27	15025.1	5.5	0	21.89	32.59	4.55	0	0	0	0	0	1	0
11	2	5	28	17715.3	31.125	0	19.06	28.91	3.09	0	0	0	0	0	1	0
11	2	5	29	17420.8	69.25	0	20.9	28.41	3.1	0	0	0	0	0	1	0
11	2	5	30	5718.04	32.375	0	22.26	29.28	3.19	0	0	0	0	0	1	0
11	2	5	31	3460.92	18.375	0	23.25	32.9	1.56	0	0	0	0	0	0	0
11	3	6	1	3091.37	2.375	0	20.53	31.27	1.42	0	0	0	0	0	1	0
11	3	6	2	3248.49	1.375	0	23.14	31.13	1.89	0	0	0	0	0	0	0
11	3	6	3	3675.06	28.75	0	19.84	32.09	3.73	0	0	0	0	0	1	0
11	3	6	4	5233.06	11.5	0	14.14	24.74	2.12	0	0	0	0	0	1	0
11	3	6	5	2679.83	62.75	5.9	19.76	27.48	1.35	0	0	0	0	0	1	0
11	3	6	6	2594.93	8.5	7.24	18.22	25.79	1.82	0	0	0	0	0	1	0
11	3	6	7	2864.52	9.625	0	17.56	26.93	1.75	0	0	0	0	0	1	0
11	3	6	8	3117.94	15.5	0	22.24	28.93	2.93	0	0	0	0	0	1	0
11	3	6	9	3474.78	8.125	0	23.47	32.51	1.7	0	0	0	0	0	0	0
11	3	6	10	6197.44	27.25	0	23.97	35.5	2.5	0	0	0	0	1	0	0
11	3	6	11	7484.51	60.125	4.44	20.99	33.59	2.93	0	0	0	0	0	1	0
11	3	6	12	5159.02	82.875	7.28	20.96	31.56	3.45	0	0	0	0	0	1	0
11	3	6	13	4836.56	65.25	12.87	21.51	31.59	2.62	1	0	0	0	0	1	0
11	3	6	14	4570.23	1.375	0	17.78	26.03	4.51	0	0	0	0	0	1	0
11	3	6	15	5164.19	23.875	0	17.87	25.64	4.26	0	0	0	0	0	1	0
11	3	6	16	5336.78	33	0	15.89	24.95	3.16	0	0	0	0	0	1	0
11	3	6	17	8341.77	63	13.01	22.03	27.7	3.76	1	0	0	0	0	1	0
11	3	6	18	8296.07	14.875	0	22.17	31.52	3.07	0	0	0	0	0	1	0
11	3	6	19	5493.89	68	0	22.79	33.73	2.37	0	0	0	0	0	1	0
11	3	6	20	5389.19	63.125	4.83	21.25	30.22	2.1	0	0	0	0	0	1	0
11	3	6	21	5643.35	24.125	2.23	17.52	25.89	0.27	0	0	0	0	0	1	0
11	3	6	22	5570.22	46	0	21.17	28.22	3.28	0	0	0	0	0	1	0
11	3	6	23	6714.85	33.25	0	24.41	31.83	4.62	0	0	0	0	0	0	0
11	3	6	24	9134.9	89.75	0	23.15	33.35	4.7	0	0	0	0	0	0	0
11	3	6	25	10209.6	58	1.96	21.69	30.81	1.06	0	0	0	0	0	1	0
11	3	6	26	7478.85	40.875	0	20.13	29.03	1.83	0	0	0	0	0	1	0
11	3	6	27	6780.69	63.375	0.1	23.46	28.15	1.95	0	0	0	0	0	0	0
11	3	6	28	6983.03	84	8.26	22.15	30.55	3.98	0	0	0	0	0	1	0
11	3	6	29	7328.5	79.375	6.45	22.25	34.46	1.56	0	0	0	0	1	1	0
11	3	6	30	9228.47	9.375	0	20.61	29.09	2.53	0	0	0	0	0	1	0
11	3	7	1	16698.7	12.625	0	18.67	28	0.98	0	0	0	0	0	1	0
11	3	7	2	22271.4	10.375	0	19.61	30.41	0.92	0	0	0	0	0	1	0
11	3	7	3	21993.8	49.5	0	23.21	30.63	2.79	0	0	0	0	0	0	0
11	3	7	4	16914.9	61.125	0.61	22.98	33.58	3.42	0	0	0	0	0	1	0
11	3	7	5	12824.4	74.125	26.09	22.2	33.73	2.08	1	1	0	0	0	1	0
11	3	7	6	12242	100	3.85	23.11	29.97	2.89	0	0	0	0	0	0	0
11	3	7	7	12000.4	71.25	13.99	21.77	29.29	2.71	1	0	0	0	0	1	0
11	3	7	8	11982.5	100	22.62	23.43	31.49	3.84	1	1	0	0	0	0	0
11	3	7	9	12710.5	68.375	22.11	23.04	30.66	0.54	1	1	0	0	0	0	0
11	3	7	10	9523.75	8.125	0	21.03	28.93	1.27	0	0	0	0	0	1	0
11	3	7	11	10751.1	21.625	0	21.73	29.78	2.63	0	0	0	0	0	1	0
11	3	7	12	10375.3	23	0	25.12	31.55	3.19	0	0	0	0	0	0	0
11	3	7	13	10738.2	25	0	25.23	34.04	1.02	0	0	0	0	1	0	0
11	3	7	14	11908.8	23.375	4.92	22.77	33.44	4.89	0	0	0	0	0	1	0
11	3	7	15	16141.4	18.75	0	18.74	25.88	4.72	0	0	0	0	0	1	0
11	3	7	16	17852	6.5	0	18.53	26.86	3.11	0	0	0	0	0	1	0
11	3	7	17	13033.8	2.875	0	20.74	27.83	1.96	0	0	0	0	0	1	0
11	3	7	18	13561	14.5	0	20.83	29.24	2.79	0	0	0	0	0	1	0
11	3	7	19	13238.1	44.375	0	22.35	31.44	3.44	0	0	0	0	0	1	0
11	3	7	20	13673	88.5	0	24.66	33.33	1.1	0	0	0	0	0	0	0
11	3	7	21	14054.2	53.125	0	25.48	31.84	3.03	0	0	0	0	0	0	0
11	3	7	22	15449.1	13.75	0	26.89	34.02	2.91	0	0	0	0	1	0	0
11	3	7	23	17071.9	14.125	0	27.79	37.27	3.69	0	0	0	0	1	0	0
11	3	7	24	16100.5	60.5	0.51	25.94	36.57	2.61	0	0	0	0	1	0	0
11	3	7	25	16454.7	100	8.89	23.64	35.21	1.28	0	0	0	0	1	0	0
11	3	7	26	17202.3	67.75	8.22	23.34	32.63	1.58	0	0	0	0	0	0	0
11	3	7	27	17122.9	11.75	0	24.16	31.66	0.94	0	0	0	0	0	0	0
11	3	7	28	17310.4	36.625	0	23.14	31.03	2.29	0	0	0	0	0	0	0
11	3	7	29	18499.2	21.125	0	25.96	32.03	1.26	0	0	0	0	0	0	0
11	3	7	30	18441.7	0	0	26.36	35.61	1.53	0	0	0	0	1	0	0
11	3	7	31	15918.3	69.125	0	24.23	31.79	1.82	0	0	0	0	0	0	0
11	3	8	1	16032.1	47.625	2.68	22.16	29.21	0.86	0	0	0	0	0	1	0
11	3	8	2	15808.1	5	0	22.92	31.16	1.1	0	0	0	0	0	1	0
11	3	8	3	14544.8	46.875	0	24.35	32.66	1.4	0	0	0	0	0	0	0
11	3	8	4	14900.5	74.25	2.77	24.47	33.12	1.11	0	0	0	0	0	0	0
11	3	8	5	15842	49.625	0	23.44	30.97	5.19	0	0	0	0	0	0	0
11	3	8	6	17287	71.625	0	23.37	27.2	4.29	0	0	0	0	0	0	0
11	3	8	7	14040.8	77.375	0.39	24.51	28.17	3.74	0	0	0	0	0	0	0
11	3	8	8	14404.3	33.125	1.13	24.54	33.98	2.88	0	0	0	0	0	0	0
11	3	8	9	14241.8	18.75	0	24.97	33.38	2.15	0	0	0	0	0	0	0
11	3	8	10	13266	6.5	0	24.24	35.82	1.64	0	0	0	0	1	0	0
11	3	8	11	13055.5	4.75	0	23.55	32.91	1.46	0	0	0	0	0	0	0
11	3	8	12	16314.8	54.25	0	20.8	29.59	2.9	0	0	0	0	0	1	0
11	3	8	13	15562	73.625	0	21.61	29.52	4.06	0	0	0	0	0	1	0
11	3	8	14	10917.6	96.5	4.92	23.95	30.6	4.58	0	0	0	0	0	0	0
11	3	8	15	10452.2	100	20.52	21	28.65	2.16	1	1	0	0	0	1	0
11	3	8	16	10514.4	51.875	7.18	20.16	29.15	3.93	0	0	0	0	0	1	0
11	3	8	17	9820.03	3.25	0	19.38	29.82	2.27	0	0	0	0	0	1	0
11	3	8	18	9373.83	20.25	0	19.43	29.03	3.03	0	0	0	0	0	1	0
11	3	8	19	11532.7	30	0	21.18	29.66	2.9	0	0	0	0	0	1	0
11	3	8	20	11906.7	34.5	0.65	21.15	29.21	1.83	0	0	0	0	0	1	0
11	3	8	21	8667.02	84.5	4.94	22.19	29.14	3.8	0	0	0	0	0	1	0
11	3	8	22	7347.9	65.75	2.06	23.17	32.78	2.02	0	0	0	0	0	0	0
11	3	8	23	7243.04	20.625	0	19.66	28.66	3.9	0	0	0	0	0	1	0
11	3	8	24	6468.36	14.125	0	18.42	27.37	3.02	0	0	0	0	0	1	0
11	3	8	25	5248.08	25.5	0	22.81	29.51	4.39	0	0	0	0	0	1	0
11	3	8	26	2487.76	58	1.59	22.06	33	2.62	0	0	0	0	0	1	0
11	3	8	27	1689.71	95.625	30.86	24.33	30.27	12	1	1	0	0	0	0	0
11	3	8	28	1522.49	66.875	207.53	21.89	25.27	7.25	1	1	1	1	0	1	0
11	3	8	29	1684.46	25.875	0	22.54	31.3	3.96	0	0	0	0	0	1	0
11	3	8	30	2875.93	29.25	0	21.43	26.05	5.2	0	0	0	0	0	1	0
11	3	8	31	3594.21	8.875	0	17.87	26.07	4.27	0	0	0	0	0	1	0
11	4	9	1	4571.05	5.5	0	16.83	25.43	3.33	0	0	0	0	0	1	0
11	4	9	2	16763.3	31.375	0	17.78	25.46	1.88	0	0	0	0	0	1	0
11	4	9	3	17548.6	23.625	0	17.38	25.97	1.79	0	0	0	0	0	1	0
11	4	9	4	17212.7	5	0	19.04	26.94	3.19	0	0	0	0	0	1	0
11	4	9	5	4342.77	41.125	0	21.71	29.46	4.42	0	0	0	0	0	1	0
11	4	9	6	2234.7	76.625	1.51	24.26	29.4	3.2	0	0	0	0	0	0	0
11	4	9	7	2273.87	60.75	0	24.41	31.81	4.67	0	0	0	0	0	0	0
11	4	9	8	2651.77	81	9.82	23.16	30.64	2.55	0	0	0	0	0	0	0
11	4	9	9	4682.52	39	0	23.16	28.18	1.36	0	0	0	0	0	0	0
11	4	9	10	5716.09	1.5	0	18.97	29.52	1.58	0	0	0	0	0	1	0
11	4	9	11	2394.7	2.875	0	20.49	29.75	0.87	0	0	0	0	0	1	0
11	4	9	12	2378.65	11.625	0	19.81	29.39	1	0	0	0	0	0	1	0
11	4	9	13	2431.79	7.5	13.79	18.45	28.64	1.54	1	0	0	0	0	1	0
11	4	9	14	2908.06	1.375	0	19.7	28.68	2.56	0	0	0	0	0	1	0
11	4	9	15	3452.84	26.75	0	19.77	30.09	2.1	0	0	0	0	0	1	0
11	4	9	16	3751.72	96.875	22.4	15.12	31.54	7.93	1	1	0	0	0	1	0
11	4	9	17	4255.21	100	10.75	15.66	19.01	7.05	1	0	0	0	0	1	0
11	4	9	18	2921.3	100	18.34	15.77	18.03	7.59	1	0	0	0	0	1	0
11	4	9	19	2498.74	79	2.44	16.83	20.67	4.82	0	0	0	0	0	1	0
11	4	9	20	2462.86	72.375	0	16.58	22.43	2.43	0	0	0	0	0	1	0
11	4	9	21	2502.46	100	9.57	20.28	23.96	2.71	0	0	0	0	0	1	0
11	4	9	22	2662.53	86	1.25	21.17	25.89	2.24	0	0	0	0	0	1	0
11	4	9	23	4200.72	86.25	6.11	21.86	27.94	2.83	0	0	0	0	0	1	0
11	4	9	24	4714.64	100	15.4	21.13	27.07	0.63	1	0	0	0	0	1	0
11	4	9	25	2493.97	100	12.19	20.58	22.97	2.36	1	0	0	0	0	1	0
11	4	9	26	2426.73	88	3.07	20.91	23.29	2.04	0	0	0	0	0	1	0
11	4	9	27	2663.68	71.75	0	21.72	25.86	2.22	0	0	0	0	0	1	0
11	4	9	28	2653.57	97.25	0	21.38	27.16	2.67	0	0	0	0	0	1	0
11	4	9	29	3399.86	100	19.96	19	28.17	3.38	1	0	0	0	0	1	0
11	4	9	30	5746.97	23	0	17.27	27.54	1.86	0	0	0	0	0	1	0
11	4	10	1	6469.24	73	4.3	15.06	28.9	5.28	0	0	0	0	0	1	0
11	4	10	2	2978.16	53.875	2.09	8.65	18.16	5.51	0	0	0	0	0	1	0
11	4	10	3	2491.6	45.375	0	8.81	15.05	5.04	0	0	0	0	0	1	0
11	4	10	4	2295.24	35	0	9.18	16.17	4.86	0	0	0	0	0	1	0
11	4	10	5	2290.35	13.625	0	12.2	20.06	5.18	0	0	0	0	0	1	0
11	4	10	6	2392.54	0	0	13.34	22.48	4.1	0	0	0	0	0	1	0
11	4	10	7	3712.99	0	0	10.13	21.17	2.74	0	0	0	0	0	1	0
11	4	10	8	4761.79	7	0	12.7	20.42	3.93	0	0	0	0	0	1	0
11	4	10	9	3144.2	14.875	0	13.67	21.35	3.69	0	0	0	0	0	1	0
11	4	10	10	2653.29	65.5	0	13.77	22.52	3.06	0	0	0	0	0	1	0
11	4	10	11	2709.28	99.875	0	16.48	23.79	3.85	0	0	0	0	0	1	0
11	4	10	12	2479.86	93.25	0.37	19.83	21.96	4.32	0	0	0	0	0	1	0
11	4	10	13	2585.88	100	0.49	19.41	22.19	2.92	0	0	0	0	0	1	0
11	4	10	14	3800.38	56.625	4.89	19.43	26.59	3.92	0	0	0	0	0	1	0
11	4	10	15	3727.87	0	0	11.31	23.22	4.58	0	0	0	0	0	1	0
11	4	10	16	2978.99	1.375	0	12.65	23.28	3.12	0	0	0	0	0	1	0
11	4	10	17	2382.49	6.625	0	13.55	23.01	5.03	0	0	0	0	0	1	0
11	4	10	18	2237.34	11.375	0	17.18	27.44	3.44	0	0	0	0	0	1	0
11	4	10	19	2378.97	100	25.35	19.03	28	3.48	1	1	0	0	0	1	0
11	4	10	20	2440.81	34.875	0.3	11.39	24.57	7.59	0	0	0	0	0	1	0
11	4	10	21	3404.31	13	0	9.93	17.86	3.97	0	0	0	0	0	1	0
11	4	10	22	3808.55	73.75	0	10.37	18.43	3.13	0	0	0	0	0	1	0
11	4	10	23	2551.47	62.875	0	10.11	17.35	2.74	0	0	0	0	0	1	0
11	4	10	24	2104.01	39.125	0	10.7	18.1	2.45	0	0	0	0	0	1	0
11	4	10	25	2028.16	2.875	0	10.15	19.2	3.99	0	0	0	0	0	1	0
11	4	10	26	2120.94	13.375	0	8.98	19.54	4.9	0	0	0	0	0	1	0
11	4	10	27	2274.5	22.25	0	13.63	23.16	5.5	0	0	0	0	0	1	0
11	4	10	28	2338.09	95.625	0	9.82	25.59	5.34	0	0	0	0	0	1	0
11	4	10	29	2604.36	85.5	1.48	9.3	16.51	2.57	0	0	0	0	0	1	0
11	4	10	30	1898.08	22	6.99	4.34	17.53	6.65	0	0	0	0	0	1	0
11	4	10	31	1762.31	36	0	2.79	11.99	2.35	0	0	0	0	0	1	0
11	4	11	1	1774.61	67.25	17.93	7.3	15.87	5.67	1	0	0	0	0	1	0
11	4	11	2	1745.62	1.125	0	6.97	15.84	4.24	0	0	0	0	0	1	0
11	4	11	3	1840.69	10.375	0	4.44	15.89	0.87	0	0	0	0	0	1	0
11	4	11	4	2411.89	80.125	0	7.01	18	4.31	0	0	0	0	0	1	0
11	4	11	5	3554.28	28.375	0.48	9.15	16.18	9.95	0	0	0	0	0	1	0
11	4	11	6	1928.19	31.75	0	8.82	13.76	5.84	0	0	0	0	0	1	0
11	4	11	7	1800.87	0.5	0	5.85	15.6	2.74	0	0	0	0	0	1	0
11	4	11	8	1957.99	0	0	5.55	18.15	1.59	0	0	0	0	0	1	0
11	4	11	9	1897.71	0.625	0	6.95	16.81	2.98	0	0	0	0	0	1	0
11	4	11	10	1992.5	18.625	0	10.52	19.09	2.44	0	0	0	0	0	1	0
11	4	11	11	2321.85	26.5	0.12	6.08	19.19	7.29	0	0	0	0	0	1	0
11	4	11	12	2119.4	0.5	0	2.09	11.05	4.25	0	0	0	0	0	1	0
11	4	11	13	1784.47	37.375	0	4.43	16.96	5.36	0	0	0	0	0	1	0
11	4	11	14	1891.83	45.625	0	9.21	19.81	5.23	0	0	0	0	0	1	0
11	4	11	15	1878.64	66.375	0	15.69	23.55	5.2	0	0	0	0	0	1	0
11	4	11	16	1791.97	82	0	16.69	25.13	3.39	0	0	0	0	0	1	0
11	4	11	17	1846.51	100	2.56	12.12	24.29	3.36	0	0	0	0	0	1	0
11	4	11	18	1879.4	1.625	3.71	1.69	11.93	5.47	0	0	0	0	0	1	0
11	4	11	19	1798	12.875	0	-0.4	8.34	1.41	0	0	0	0	0	1	1
11	4	11	20	1676.08	43.125	0	2.81	16.85	2.99	0	0	0	0	0	1	0
11	4	11	21	1755.76	59.375	0	12	22.9	1.91	0	0	0	0	0	1	0
11	4	11	22	1807.25	61.125	0	13.74	19.24	2.79	0	0	0	0	0	1	0
11	4	11	23	1914.73	98.375	7.1	14.84	19.9	4	0	0	0	0	0	1	0
11	4	11	24	2277.88	30.125	0.98	7.8	22.01	7.41	0	0	0	0	0	1	0
11	4	11	25	2535.66	1.375	0	3.76	14.27	3.04	0	0	0	0	0	1	0
11	4	11	26	2353.45	11.75	0	5.54	19.8	3.5	0	0	0	0	0	1	0
11	4	11	27	1833.05	18	0	7.91	20.61	3.45	0	0	0	0	0	1	0
11	4	11	28	1725.37	46.25	0	11.5	20.91	3.44	0	0	0	0	0	1	0
11	4	11	29	1733.47	79	1.68	15.8	21.73	3.25	0	0	0	0	0	1	0
11	4	11	30	1726.38	43	14.11	4.47	18.94	5.77	1	0	0	0	0	1	0
11	1	12	1	1693.74	26.5	0	3.04	11.21	6	0	0	0	0	0	1	0
11	1	12	2	1691.04	3.75	0	1.82	10.49	1.97	0	0	0	0	0	1	0
11	1	12	3	1861.1	11.5	0	2.5	14.75	4.04	0	0	0	0	0	1	0
11	1	12	4	1594.05	37.375	0	5.56	12.28	2.87	0	0	0	0	0	1	0
11	1	12	5	1631.76	33.5	0	7.18	16.89	2.11	0	0	0	0	0	1	0
11	1	12	6	1644.79	80.875	0	12.2	20.56	2.94	0	0	0	0	0	1	0
11	1	12	7	1631.8	94.375	0	15.33	21.97	5.18	0	0	0	0	0	1	0
11	1	12	8	1701.58	51	9.82	5.11	22.91	4.67	0	0	0	0	0	1	0
11	1	12	9	1922.71	41.125	0	2.62	9.46	2.17	0	0	0	0	0	1	0
11	1	12	10	1875.73	71.875	2.26	4.74	15.1	4.38	0	0	0	0	0	1	0
11	1	12	11	1754.95	57.625	0	2.72	9.63	5.59	0	0	0	0	0	1	0
11	1	12	12	1828.67	44.25	0	2.98	8.24	5.39	0	0	0	0	0	1	0
11	1	12	13	1879.06	48.75	0	4.3	12.21	4.14	0	0	0	0	0	1	0
11	1	12	14	1838.07	44.125	0	3.17	11.23	3.69	0	0	0	0	0	1	0
11	1	12	15	1854.84	66.25	0	5.49	11.78	2.58	0	0	0	0	0	1	0
11	1	12	16	1973.8	65.875	0	8.07	19.11	2.85	0	0	0	0	0	1	0
11	1	12	17	2028.07	72.5	6.43	4.91	17.23	5.23	0	0	0	0	0	1	0
11	1	12	18	1886.33	44.75	0	0.98	7.03	4.84	0	0	0	0	0	1	0
11	1	12	19	1745.06	19.875	0	-1.77	7.06	2.33	0	0	0	0	0	1	1
11	1	12	20	1752.77	50	0	-0.26	12.33	4.31	0	0	0	0	0	1	1
11	1	12	21	1689.37	99	0.92	7.44	14.74	3.74	0	0	0	0	0	1	0
11	1	12	22	1763.65	51.125	14.19	12.77	18.11	2.92	1	0	0	0	0	1	0
11	1	12	23	1817.94	80	0	14.58	19.86	1.82	0	0	0	0	0	1	0
11	1	12	24	1817.94	57.125	0	7.15	16.71	3.52	0	0	0	0	0	1	0
11	1	12	25	1815.05	38.875	0	0.71	10.91	1.29	0	0	0	0	0	1	0
11	1	12	26	1763.35	1.875	0	1.74	12.29	5.08	0	0	0	0	0	1	0
11	1	12	27	1816.34	69.25	0	1.05	10.49	3.47	0	0	0	0	0	1	0
11	1	12	28	1816.34	26.375	14.51	5.82	16.33	6.23	1	0	0	0	0	1	0
11	1	12	29	2001.59	22.375	0	-0.88	11.93	2.48	0	0	0	0	0	1	1
11	1	12	30	2032.31	19.125	0	-0.03	10.08	3.85	0	0	0	0	0	1	1
11	1	12	31	1894.45	47.25	0	4.21	15.7	3.49	0	0	0	0	0	1	0
12	1	1	1	1676.67	11.125	0	2.28	17.8	1.81	0	0	0	0	0	1	0
12	1	1	2	1617.89	38.375	0	2.51	17.92	4.6	0	0	0	0	0	1	0
12	1	1	3	1720.57	38.5	0	-0.75	8.3	7.94	0	0	0	0	0	1	1
12	1	1	4	1786	32.625	0	-5.73	2.36	5.72	0	0	0	0	0	1	1
12	1	1	5	1765.95	43	0	-5.08	3.27	3.63	0	0	0	0	0	1	1
12	1	1	6	1841.2	5.375	0	-0.49	10.7	4.39	0	0	0	0	0	1	1
12	1	1	7	1701.19	14	0	4.29	18.52	4.65	0	0	0	0	0	1	0
12	1	1	8	1729.98	31.5	0	6.49	18.32	1.91	0	0	0	0	0	1	0
12	1	1	9	1765.67	74.125	0.71	3.49	11.22	3.96	0	0	0	0	0	1	0
12	1	1	10	1826.45	35.75	4.11	3.27	8.06	2.86	0	0	0	0	0	1	0
12	1	1	11	1791.76	39.5	0	0.83	11.59	2.5	0	0	0	0	0	1	0
12	1	1	12	1708.08	54	17.22	3.85	13.8	3.62	1	0	0	0	0	1	0
12	1	1	13	2127.25	18.5	0	5.36	14.84	6.24	0	0	0	0	0	1	0
12	1	1	14	2158.02	26.125	0	-2.47	5.8	5.76	0	0	0	0	0	1	1
12	1	1	15	1888.13	48.625	0	-2.81	4.3	3.99	0	0	0	0	0	1	1
12	1	1	16	1716.16	26.625	0	-4.04	2.17	0.67	0	0	0	0	0	1	1
12	1	1	17	1665.53	68.375	0	-1.93	9.44	6.09	0	0	0	0	0	1	1
12	1	1	18	1602	68.75	1.19	9.05	17.53	3.23	0	0	0	0	0	1	0
12	1	1	19	1604.8	37.875	0.75	-2.24	9.19	3.77	0	0	0	0	0	1	1
12	1	1	20	1728.78	50	0	-0.12	6.67	1.47	0	0	0	0	0	1	1
12	1	1	21	1698.19	100	2.57	3.07	10.87	2.4	0	0	0	0	0	1	0
12	1	1	22	1702.13	96.375	10.4	2.15	15.19	6.68	1	0	0	0	0	1	0
12	1	1	23	1702.13	85.125	0.52	3.77	7.69	1.46	0	0	0	0	0	1	0
12	1	1	24	1759.89	79.375	0.44	6.7	16.15	2.93	0	0	0	0	0	1	0
12	1	1	25	1732.9	11.625	0	4.03	17.13	2.33	0	0	0	0	0	1	0
12	1	1	26	1723.08	35.875	0	3.33	10.18	2.44	0	0	0	0	0	1	0
12	1	1	27	1645.7	98.875	0.01	6.5	18.61	4.46	0	0	0	0	0	1	0
12	1	1	28	1742.59	1	9.21	3.85	19.83	1.34	0	0	0	0	0	1	0
12	1	1	29	1622.01	0.125	0	3.6	15.52	2.74	0	0	0	0	0	1	0
12	1	1	30	1616.81	1.75	0	1.95	9.5	3.3	0	0	0	0	0	1	0
12	1	1	31	1575.42	3.25	0	1.64	10.68	4.62	0	0	0	0	0	1	0
12	1	2	1	1735.64	35.875	0	7.23	18.78	5.37	0	0	0	0	0	1	0
12	1	2	2	1711.26	79.125	6.72	11.16	21.85	3.05	0	0	0	0	0	1	0
12	1	2	3	1998.1	3.125	4.62	5.1	14.46	4.34	0	0	0	0	0	1	0
12	1	2	4	1952.94	43.625	0	0.02	9.37	2.19	0	0	0	0	0	1	0
12	1	2	5	1759.69	97.75	15.03	3.47	15.71	5.07	1	0	0	0	0	1	0
12	1	2	6	1664.11	28	0.4	-0.7	7.04	2.73	0	0	0	0	0	1	1
12	1	2	7	1669.44	36.125	0	0.38	9.48	1.78	0	0	0	0	0	1	0
12	1	2	8	1723.43	61.625	0	0.89	12.14	3.93	0	0	0	0	0	1	0
12	1	2	9	1754.42	77.25	4.41	2.89	10.93	4.94	0	0	0	0	0	1	0
12	1	2	10	1912.99	30.625	0	0.17	8.02	2.07	0	0	0	0	0	1	0
12	1	2	11	1971.22	100	0.5	2.77	11.06	1.96	0	0	0	0	0	1	0
12	1	2	12	1768.17	44.625	1.96	-4.28	8.02	9.3	0	0	0	0	0	1	1
12	1	2	13	1757.83	4.875	0	-5.45	2.43	4	0	0	0	0	0	1	1
12	1	2	14	1789.73	84.5	0	-3.12	9.42	3.83	0	0	0	0	0	1	1
12	1	2	15	1830.02	43.5	0	5.05	12.77	1.85	0	0	0	0	0	1	0
12	1	2	16	1921.11	61.5	0	2.05	12.87	2.98	0	0	0	0	0	1	0
12	1	2	17	2067.78	82.625	6.34	6.11	12.5	2.67	0	0	0	0	0	1	0
12	1	2	18	2268.52	32.375	0	4.13	11.2	1.21	0	0	0	0	0	1	0
12	1	2	19	1998.3	96.75	0	6.64	13.26	3.64	0	0	0	0	0	1	0
12	1	2	20	1745.9	71.625	22.33	1.87	7.2	8.8	1	1	0	0	0	1	0
12	1	2	21	1716.15	31.375	0	-2.21	7.09	0.74	0	0	0	0	0	1	1
12	1	2	22	1716.15	38.25	0	0.25	12.45	4.17	0	0	0	0	0	1	0
12	1	2	23	1770.67	57.875	0.57	9.29	19.83	3.41	0	0	0	0	0	1	0
12	1	2	24	1904.86	61.875	0	11.08	22.9	4.49	0	0	0	0	0	1	0
12	1	2	25	2032.23	51.125	4.54	6.2	26.17	7.43	0	0	0	0	0	1	0
12	1	2	26	1776.27	6.375	0	1.64	11.06	4.65	0	0	0	0	0	1	0
12	1	2	27	1821.58	23.625	0	-0.05	7.55	3.69	0	0	0	0	0	1	1
12	1	2	28	1804.29	19.875	0	3.99	15.05	1.64	0	0	0	0	0	1	0
12	1	2	29	1825.24	73.5	0	3.47	11.96	2.65	0	0	0	0	0	1	0
12	2	3	1	2166.04	56.5	10.18	11.86	19.04	4.27	1	0	0	0	0	1	0
12	2	3	2	1884.29	34.5	0	8.17	26.4	3.8	0	0	0	0	0	1	0
12	2	3	3	1937.97	100	16.49	9.97	18.58	3.07	1	0	0	0	0	1	0
12	2	3	4	1848.54	96.375	14.62	7.05	18.17	0.99	1	0	0	0	0	1	0
12	2	3	5	1725.64	66.625	21.29	1.3	7.21	2.96	1	1	0	0	0	1	0
12	2	3	6	1686.65	3.25	0.42	1.59	9.32	3.93	0	0	0	0	0	1	0
12	2	3	7	1771.52	8.5	0	1.43	7.08	3.64	0	0	0	0	0	1	0
12	2	3	8	1851.91	17.75	0	6.82	18.96	4.65	0	0	0	0	0	1	0
12	2	3	9	2075.92	94	1.96	13.5	23.04	1.12	0	0	0	0	0	1	0
12	2	3	10	2101.31	14.375	8.68	2.27	14.22	4.35	0	0	0	0	0	1	0
12	2	3	11	1901.01	5.125	0	0.7	7.97	1.48	0	0	0	0	0	1	0
12	2	3	12	1975.29	8	0	4.2	13.75	3.61	0	0	0	0	0	1	0
12	2	3	13	2176.27	50.25	2.1	9.09	21.09	5.03	0	0	0	0	0	1	0
12	2	3	14	2437.2	4.5	1.13	13.28	23.82	1.74	0	0	0	0	0	1	0
12	2	3	15	2478.57	9.25	0	13.12	25.3	2.11	0	0	0	0	0	1	0
12	2	3	16	3244.09	85.875	0	17.67	28.36	1.88	0	0	0	0	0	1	0
12	2	3	17	3951.73	54.625	19.21	13.33	26.75	3.19	1	0	0	0	0	1	0
12	2	3	18	2660.09	63.5	0	10.8	17.82	3.42	0	0	0	0	0	1	0
12	2	3	19	2148.61	6.875	2.8	10.84	17.07	1.7	0	0	0	0	0	1	0
12	2	3	20	2113.62	72.125	0	12.01	21.54	1.63	0	0	0	0	0	1	0
12	2	3	21	2096.25	78.625	0	13.3	21.83	2.25	0	0	0	0	0	1	0
12	2	3	22	2437.8	79.75	3.89	16.99	23.01	2.27	0	0	0	0	0	1	0
12	2	3	23	3016.43	34.125	0	16.2	26.06	2.32	0	0	0	0	0	1	0
12	2	3	24	3322.09	74	0.83	16.86	27.94	2.21	0	0	0	0	0	1	0
12	2	3	25	2608.15	100	15.17	15.97	23.77	1.64	1	0	0	0	0	1	0
12	2	3	26	2372.59	67.875	1.09	12.3	18.17	5.78	0	0	0	0	0	1	0
12	2	3	27	2517.62	3.25	0	5.24	20.1	6.66	0	0	0	0	0	1	0
12	2	3	28	2486.57	8.125	0	5.99	12.1	4.85	0	0	0	0	0	1	0
12	2	3	29	2456.75	1.625	0	11.1	24.97	2.45	0	0	0	0	0	1	0
12	2	3	30	3128.03	28.375	0	9.26	22.21	3.77	0	0	0	0	0	1	0
12	2	3	31	3288.2	72.125	0.88	11.8	17.08	0.95	0	0	0	0	0	1	0
12	2	4	1	2747.13	73	0.4	9.17	21.99	4.12	0	0	0	0	0	1	0
12	2	4	2	2631.78	27.625	1.57	10.13	17.09	2.65	0	0	0	0	0	1	0
12	2	4	3	2863.56	3.875	0.09	5.82	14.97	1.46	0	0	0	0	0	1	0
12	2	4	4	3184.99	58.125	0	11.86	19.29	1.8	0	0	0	0	0	1	0
12	2	4	5	3660.41	65.375	3.62	11.23	27.6	4.35	0	0	0	0	0	1	0
12	2	4	6	3916.07	53.875	0	9.14	11.2	5.42	0	0	0	0	0	1	0
12	2	4	7	3887.56	0	0	5.05	12.91	4.92	0	0	0	0	0	1	0
12	2	4	8	3058.54	6.75	0	5.83	17.26	2.25	0	0	0	0	0	1	0
12	2	4	9	2909.82	0.75	0	9.74	21.12	2.87	0	0	0	0	0	1	0
12	2	4	10	3324.87	18.75	0	9.01	23.1	2.45	0	0	0	0	0	1	0
12	2	4	11	3393	44.125	0	8.91	22.75	5.13	0	0	0	0	0	1	0
12	2	4	12	3498.42	12.25	0	5.57	12.75	5.54	0	0	0	0	0	1	0
12	2	4	13	4905.22	52.5	0	5.93	15.97	1.96	0	0	0	0	0	1	0
12	2	4	14	5537.99	12.625	0	6.74	17.09	3.09	0	0	0	0	0	1	0
12	2	4	15	2749.92	33.5	0	13.86	23.27	5.57	0	0	0	0	0	1	0
12	2	4	16	2274.37	6.625	0	17.18	27.88	5.22	0	0	0	0	0	1	0
12	2	4	17	2342.67	1.75	0	17.25	29.35	0.93	0	0	0	0	0	1	0
12	2	4	18	2330.45	45.375	0	14.36	26.6	4.46	0	0	0	0	0	1	0
12	2	4	19	2430.66	100	12.22	11.86	18.02	4.6	1	0	0	0	0	1	0
12	2	4	20	4039.55	71.75	0	9.29	15.18	2.79	0	0	0	0	0	1	0
12	2	4	21	4247.62	71.25	0	12.27	19.97	3.22	0	0	0	0	0	1	0
12	2	4	22	2523.23	100	4.4	15.95	26.45	2.41	0	0	0	0	0	1	0
12	2	4	23	1903.38	96.375	36.75	8.96	16.86	5.74	1	1	0	0	0	1	0
12	2	4	24	2101.81	16.25	0	5.52	14.01	5.42	0	0	0	0	0	1	0
12	2	4	25	2221.39	18.625	0	5.52	17.2	2.83	0	0	0	0	0	1	0
12	2	4	26	2286.41	76.75	0.69	11.86	20.99	3.47	0	0	0	0	0	1	0
12	2	4	27	3542.15	11.375	0.79	15.08	24.13	2.94	0	0	0	0	0	1	0
12	2	4	28	3472.42	44.75	0	9.48	19.37	4.23	0	0	0	0	0	1	0
12	2	4	29	2363.74	95.75	3.86	11.09	15.75	2.81	0	0	0	0	0	1	0
12	2	4	30	2080.16	60.375	0	8.18	15.97	2.05	0	0	0	0	0	1	0
12	2	5	1	1815.49	82.375	0	14.99	20.86	4.53	0	0	0	0	0	1	0
12	2	5	2	2252.77	49.375	0.01	19.19	28.92	2.25	0	0	0	0	0	1	0
12	2	5	3	5706.01	36	0	14.3	29.49	2.72	0	0	0	0	0	1	0
12	2	5	4	14427.1	33.875	0	15.2	23.01	1.31	0	0	0	0	0	1	0
12	2	5	5	14573.7	100	10.94	18.18	29.34	1.15	1	0	0	0	0	1	0
12	2	5	6	2297.02	78.375	1.09	15.83	26.01	5.44	0	0	0	0	0	1	0
12	2	5	7	1967.31	16.875	0.11	13.07	19.1	4.54	0	0	0	0	0	1	0
12	2	5	8	2083.5	4.125	0	13.64	19.61	3.92	0	0	0	0	0	1	0
12	2	5	9	2348.94	67.5	0	18.9	24.93	3.95	0	0	0	0	0	1	0
12	2	5	10	2540.96	59.875	72.1	13.45	22.76	4.41	1	1	1	0	0	1	0
12	2	5	11	6504.02	1.375	0	12.03	21.81	2.91	0	0	0	0	0	1	0
12	2	5	12	6972.97	12.75	0	11.32	20.67	2.48	0	0	0	0	0	1	0
12	2	5	13	3703.05	30.5	0	15.68	24.88	3.51	0	0	0	0	0	1	0
12	2	5	14	3178.3	100	0	18.79	24.94	3.64	0	0	0	0	0	1	0
12	2	5	15	2326.98	80.25	2.17	19.02	24.8	3.99	0	0	0	0	0	1	0
12	2	5	16	2070.36	100	30.4	19.1	25.13	2.17	1	1	0	0	0	1	0
12	2	5	17	2607.04	82.5	7.67	17	25.66	1.96	0	0	0	0	0	1	0
12	2	5	18	6705.7	42.75	0	15.21	22.88	5.65	0	0	0	0	0	1	0
12	2	5	19	7695.16	17.125	0	12.86	20.96	6.04	0	0	0	0	0	1	0
12	2	5	20	3094.61	49.875	0	15.88	21.87	5.55	0	0	0	0	0	1	0
12	2	5	21	2774.74	93.375	15.68	16.2	19.1	2.45	1	0	0	0	0	1	0
12	2	5	22	2855.1	92.375	0.67	15.92	23.19	1.01	0	0	0	0	0	1	0
12	2	5	23	3188.86	75.125	6.19	16.39	25.75	1.89	0	0	0	0	0	1	0
12	2	5	24	3973.64	54.75	4.79	18.04	26.96	2.98	0	0	0	0	0	1	0
12	2	5	25	19890.8	7.625	0	20.12	25.37	2.9	0	0	0	0	0	1	0
12	2	5	26	22049.4	2.5	0	19.12	25.81	3.16	0	0	0	0	0	1	0
12	2	5	27	21021.6	9	0	19.29	26	3.2	0	0	0	0	0	1	0
12	2	5	28	5137.24	27.625	0	22.75	26.97	2.89	0	0	0	0	0	1	0
12	2	5	29	2339.26	70.125	0	22.88	29.82	4.22	0	0	0	0	0	1	0
12	2	5	30	2217.73	70.375	0.52	23.04	30.78	1.44	0	0	0	0	0	0	0
12	2	5	31	2761.64	5.375	53.91	18.31	23.83	2.46	1	1	1	0	0	1	0
12	3	6	1	5495.46	23.375	0	20.68	29.26	3.37	0	0	0	0	0	1	0
12	3	6	2	6648.61	79.375	20.15	18.01	28.23	0.46	1	1	0	0	0	1	0
12	3	6	3	3625.43	9.5	0.53	16.14	23.74	3.08	0	0	0	0	0	1	0
12	3	6	4	3336.54	27.375	0	17.17	25	3.25	0	0	0	0	0	1	0
12	3	6	5	2725.68	42.25	3.56	15.6	27.73	4.56	0	0	0	0	0	1	0
12	3	6	6	2676.45	60.25	0	13.78	18.89	4.2	0	0	0	0	0	1	0
12	3	6	7	3278.12	5.375	0	13.01	20.88	0.83	0	0	0	0	0	1	0
12	3	6	8	8683.65	16.625	0	15.72	23.47	1.17	0	0	0	0	0	1	0
12	3	6	9	10929.1	8.875	0	17.8	27.48	1.68	0	0	0	0	0	1	0
12	3	6	10	6019.49	11.625	0	20.11	30.84	1.95	0	0	0	0	0	1	0
12	3	6	11	4905.34	21.875	0	20.23	31.74	2.6	0	0	0	0	0	1	0
12	3	6	12	4851.01	92.125	0	21.87	28.96	5.56	0	0	0	0	0	1	0
12	3	6	13	5163.79	94.875	4.39	21.71	26.05	2.64	0	0	0	0	0	1	0
12	3	6	14	5450.48	51.25	0	19.97	27.11	5.73	0	0	0	0	0	1	0
12	3	6	15	9711.04	29.25	0	18.03	22.97	6.88	0	0	0	0	0	1	0
12	3	6	16	12616.7	3.25	0	17.25	22.86	6.17	0	0	0	0	0	1	0
12	3	6	17	6912.21	6.625	0	17.21	22.83	4.97	0	0	0	0	0	1	0
12	3	6	18	5629.18	45.25	0	13.34	21.01	2.25	0	0	0	0	0	1	0
12	3	6	19	6764.66	76.25	0	18.91	22.92	2.3	0	0	0	0	0	1	0
12	3	6	20	6808.33	44.875	0.63	20.32	29.48	1.72	0	0	0	0	0	1	0
12	3	6	21	7733.84	15.5	0	23.93	32.47	1.58	0	0	0	0	0	0	0
[truncated: 1,604 more rows]
